# Supplementary material for: Eosin Y-catalyzed, visible-light-promoted carbophosphinylation of allylic alcohols via a radical neophyl rearrangement
Source: Royal Society of Chemistry journal article supplement (doi:10.1039/c8ob00231b), 2018-01-01

## *Supporting information*

### **Eosin Y-Catalyzed, Visible-Light-Promoted Carbophosphinylation of Allylic Alcohols via Radical Neophyl Rearrangement**

Yao Yin, Wei-Zhi Weng, Jian-Guo Sun, and Bo Zhang\*

*State Key Laboratory of Natural Medicines, China Pharmaceutical University,  
24 Tongjia Xiang, Nanjing 210009, China*

*E-mail: zb3981444@cpu.edu.cn.*

#### **Table of contents**

|                                                                                            |     |
|--------------------------------------------------------------------------------------------|-----|
| General                                                                                    | S2  |
| General procedure for visible-light-promoted carbophosphinylation of allylic alcohols (GP) | S3  |
| Physical data of the compounds                                                             | S3  |
| Larger scale experiment                                                                    | S16 |
| Mechanistic studies                                                                        | S17 |
| Crystallographic data of <b>3la</b>                                                        | S20 |
| References                                                                                 | S21 |
| NMR spectra                                                                                | S22 |

## General

All manipulations were conducted with a standard *Schlenk* tube under a nitrogen atmosphere. Unless otherwise noted, materials obtained from commercial suppliers were used without further purification. Allylic alcohols **1a-l** were prepared according to a reported method.<sup>[1]</sup> The P(O)H compounds **2b-g** were prepared according to a reported method.<sup>[2]</sup> The P(O)H compound **2i** was prepared according to a reported method.<sup>[3]</sup>

Flash column chromatography was carried out on silica gel (200-300 mesh). Thin layer chromatography (TLC) was performed using silica gel 60 F<sub>254</sub> plates.

<sup>1</sup>H NMR spectra were recorded on a *Bruker AV-300* spectrometer at room temperature. Chemical shifts (in ppm) were referenced to tetramethylsilane ( $\delta$  = 0 ppm) in CDCl<sub>3</sub> as an internal standard. <sup>13</sup>C NMR spectra were obtained by the same NMR spectrometer and were calibrated with CDCl<sub>3</sub> ( $\delta$  = 77.00 ppm). <sup>31</sup>P NMR spectra were recorded on a *Bruker AV-300* spectrometer and using 85% H<sub>3</sub>PO<sub>4</sub> as external standard. Data for <sup>1</sup>H NMR are reported as follows: chemical shifts ( $\delta$  ppm), multiplicity (s = singlet, d = doublet, t = triplet, q = quartet, m = multiplet or unresolved, br s = broad singlet), coupling constant (Hz) and integration. Data for <sup>13</sup>C NMR are reported in terms of chemical shift and multiplicity where appropriate. Mass spectra were performed on an *Aglient 6530 Q-TOF* for HRMS. The yields were determined on a *METTLER TOLEDO ME 104* balance (accuracy: 0.1 mg).

***General procedure for visible-light-promoted carbophosphinylation of allylic alcohols (GP):***

Allylic alcohol **1** (0.2 mmol, 1.0 equiv), P(O)H compound **2** (0.5 mmol, 2.5 equiv), and eosin Y (0.02 mmol, 0.1 equiv) were placed in a dry 10 mL Schlenk tube under a nitrogen atmosphere. Then DMA (2.0 mL) was added. The reaction mixture was stirred and irradiated by 12 W blue LEDs (450 nm) at room temperature for 24 h. After the reaction was completed monitored by TLC, H<sub>2</sub>O (10.0 mL) was added, and the mixture was extracted by EtOAc (3x10.0 mL). The combined organic layer was dried over anhydrous Na<sub>2</sub>SO<sub>4</sub>, filtered, and concentrated by rotary evaporation. The crude reaction mixture was purified by flash column chromatography on silica gel to afford the corresponding product.

***Physical data of the compounds***

**3-(Diphenylphosphoryl)-1,2-diphenylpropan-1-one (3aa)**<sup>[4]</sup>

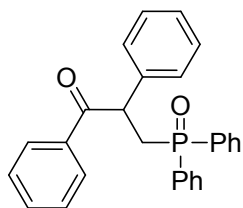

According to **GP** with 1,1-diphenylprop-2-en-1-ol **1a** (42.1 mg, 0.2 mmol, 1.0 equiv), diphenylphosphine oxide **2a** (101.2 mg, 0.5 mmol, 2.5 equiv), and eosin Y (13.0 mg, 0.02 mmol, 0.1 equiv). The crude reaction mixture was purified by flash silica gel column chromatography (petroleum ether/EtOAc = 3/1) to afford the desired product **3aa** as white solid (62.0 mg, 77%). <sup>1</sup>H NMR (300 MHz, CDCl<sub>3</sub>) δ 7.89-7.81 (m, 2H), 7.72-7.66 (m, 2H), 7.63-7.57 (m, 2H), 7.39-7.22 (m, 11H), 7.11-7.00 (m, 3H), 5.35-5.27 (m, 1H), 3.54-3.43 (m, 1H), 2.82-2.71 (m, 1H); <sup>13</sup>C NMR (75 MHz, CDCl<sub>3</sub>) δ 197.6 (d, *J* = 6.0 Hz), 138.3 (d, *J* = 7.1 Hz), 135.5, 133.2 (d, *J* = 40.1 Hz), 132.6, 131.8 (d, *J* = 40.1 Hz), 131.4 (d, *J* = 2.8 Hz), 131.1 (d, *J* = 2.8 Hz), 130.4 (dd, *J* = 10.7, 9.6 Hz), 128.6 (d, *J* = 9.4 Hz), 128.2 (d, *J* = 5.6 Hz), 128.1-128.0 (m), 127.0, 46.3 (d, *J* = 1.7 Hz), 33.6 (d, *J* = 70.4 Hz); <sup>31</sup>P NMR (121.5 MHz, CDCl<sub>3</sub>) δ 30.28; HRMS (ESI) calculated for C<sub>27</sub>H<sub>24</sub>O<sub>2</sub>P [M+H]<sup>+</sup> *m/z* 411.1508, found 411.1510.

### 3-(Diphenylphosphoryl)-1,2-di-*p*-tolylpropan-1-one (3ba)<sup>[4]</sup>

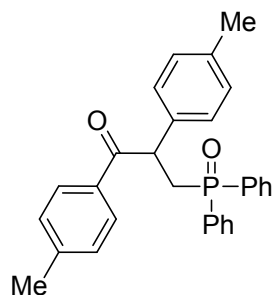

According to **GP** with 1,1-di-*p*-tolylprop-2-en-1-ol **1b** (47.9 mg, 0.2 mmol, 1.0 equiv), diphenylphosphine oxide **2a** (101.5 mg, 0.5 mmol, 2.5 equiv), and eosin Y (13.5 mg, 0.02 mmol, 0.1 equiv). The crude reaction mixture was purified by flash silica gel column chromatography (petroleum ether/EtOAc = 3/1) to afford the desired product **3ba** as white solid (55.0 mg, 63%). **<sup>1</sup>H NMR** (300 MHz, CDCl<sub>3</sub>) δ 7.75 (d, *J* = 8.1 Hz, 2H), 7.72-7.65 (m, 2H), 7.60-7.54 (m, 2H), 7.41-7.26 (m, 6H), 7.09 (d, *J* = 7.8 Hz, 4H), 6.87 (d, *J* = 7.8 Hz, 2H), 5.28-5.20 (m, 1H), 3.46-3.36 (m, 1H), 2.81-2.71 (m, 1H), 2.29 (s, 3H), 2.16 (s, 3H); **<sup>13</sup>C NMR** (75 MHz, CDCl<sub>3</sub>) δ 197.5 (d, *J* = 7.1 Hz), 143.7, 136.8, 135.6 (d, *J* = 7.1 Hz), 133.5 (d, *J* = 52.7 Hz), 133.1, 132.2 (d, *J* = 53.3 Hz), 131.3 (dd, *J* = 40.1, 2.7 Hz), 130.7 (dd, *J* = 9.3, 5.5 Hz), 129.5, 129.0 (d, *J* = 3.8 Hz), 128.4, 128.2 (dd, *J* = 11.6, 2.8 Hz), 46.0 (d, *J* = 1.7 Hz), 33.8 (d, *J* = 71.0 Hz), 21.5, 20.8; **<sup>31</sup>P NMR** (121.5 MHz, CDCl<sub>3</sub>) δ 30.46; **HRMS** (ESI) calculated for C<sub>29</sub>H<sub>28</sub>O<sub>2</sub>P [M+H]<sup>+</sup> *m/z* 439.1821, found 439.1827.

### 3-(Diphenylphosphoryl)-1,2-di-*m*-tolylpropan-1-one (3ca)

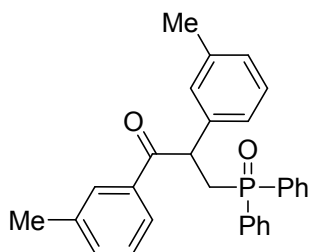

According to **GP** with 1,1-di-*m*-tolylprop-2-en-1-ol **1c** (47.8 mg, 0.2 mmol, 1.0 equiv), diphenylphosphine oxide **2a** (101.8 mg, 0.5 mmol, 2.5 equiv), and eosin Y (13.6 mg, 0.02 mmol, 0.1 equiv). The crude reaction mixture was purified by flash silica gel column chromatography (petroleum ether/EtOAc = 3/1) to afford the desired product **3ca** as colourless oil (62.0 mg, 71%). **<sup>1</sup>H NMR** (300 MHz, CDCl<sub>3</sub>) δ 7.72-7.56 (m, 6H), 7.37-7.27 (m, 6H), 7.20-7.12 (m, 2H), 7.06-6.95 (m, 3H), 6.81 (d, *J* = 7.2 Hz,

1H), 5.32-5.24 (m, 1H), 3.48-3.37 (m, 1H), 2.84-2.74 (m, 1H), 2.25 (s, 3H), 2.12 (s, 3H); <sup>13</sup>C NMR (75 MHz, CDCl<sub>3</sub>) δ 197.9 (d, J = 7.1 Hz), 138.2, 138.24, 138.21 (d, J = 7.1 Hz), 135.5, 133.5, 133.4 (d, J = 54.5 Hz), 132.0 (d, J = 53.9 Hz), 131.1 (dd, J = 22.0, 2.8 Hz), 130.4 (dd, J = 11.0, 9.3 Hz), 128.9 (d, J = 23.1 Hz), 128.4 (d, J = 23.6 Hz), 128.0 (d, J = 5.0 Hz), 129.9 (d, J = 6.1 Hz), 127.8, 125.8, 125.0, 46.3 (d, J = 1.7 Hz), 33.6 (d, J = 70.4 Hz), 21.0; <sup>31</sup>P NMR (121.5 MHz, CDCl<sub>3</sub>) δ 30.32; HRMS (ESI) calculated for C<sub>29</sub>H<sub>28</sub>O<sub>2</sub>P [M+H]<sup>+</sup> m/z 439.1821, found 439.1823.

### 3-(Diphenylphosphoryl)-1,2-di-*o*-tolylpropan-1-one (3da)

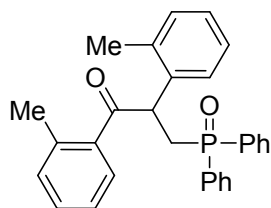

According to **GP** with 1,1-di-*o*-tolylprop-2-en-1-ol **1d** (47.7 mg, 0.2 mmol, 1.0 equiv), diphenylphosphine oxide **2a** (101.5 mg, 0.5 mmol, 2.5 equiv), and eosin Y (13.8 mg, 0.02 mmol, 0.1 equiv). The crude reaction mixture was purified by flash silica gel column chromatography (petroleum ether/EtOAc = 3/1) to afford the desired product **3da** as colourless oil (67.0 mg, 76%). <sup>1</sup>H NMR (300 MHz, CDCl<sub>3</sub>) δ 7.82-7.76 (m, 2H), 7.65-7.58 (m, 2H), 7.45-7.38 (m, 5H), 7.33-7.26 (m, 2H), 7.22-7.08 (m, 3H), 7.06-6.94 (m, 3H), 6.89 (d, J = 7.2 Hz, 1H), 5.29-5.21 (m, 1H), 3.67-3.56 (m, 1H), 2.69-2.59 (m, 1H), 2.13 (s, 3H), 2.10 (s, 3H); <sup>13</sup>C NMR (75 MHz, CDCl<sub>3</sub>) δ 201.8 (d, J = 6.6 Hz), 138.4, 137.4, 136.3, 136.0 (d, J = 7.7 Hz), 133.6 (d, J = 45.1 Hz), 132.3 (d, J = 44.6 Hz), 131.7 (d, J = 2.7 Hz), 131.4 (d, J = 2.2 Hz), 130.8 (dd, J = 23.1, 15.4 Hz), 130.6 (d, J = 2.2 Hz), 130.4, 128.4 (dd, J = 18.4, 11.8 Hz), 127.4, 127.3, 126.2, 125.2, 45.3 (d, J = 1.1 Hz), 32.8 (d, J = 70.3 Hz), 20.0, 19.6; <sup>31</sup>P NMR (121.5 MHz, CDCl<sub>3</sub>) δ 30.35; HRMS (ESI) calculated for C<sub>29</sub>H<sub>28</sub>O<sub>2</sub>P [M+H]<sup>+</sup> m/z 439.1821, found 439.1824.

### 3-(Diphenylphosphoryl)-1,2-bis(4-fluorophenyl)propan-1-one (3ea)<sup>[4]</sup>

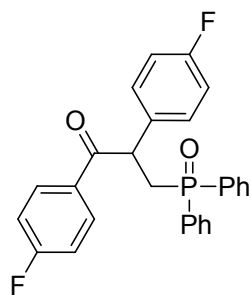

According to **GP** with 1,1-bis(4-fluorophenyl)prop-2-en-1-ol **1e** (49.5 mg, 0.2 mmol, 1.0 equiv), diphenylphosphine oxide **2a** (101.5 mg, 0.5 mmol, 2.5 equiv), and eosin Y (13.2 mg, 0.02 mmol, 0.1 equiv). The crude reaction mixture was purified by flash silica gel column chromatography (petroleum ether/EtOAc = 3/1) to afford the desired product **3ea** as white solid (44.5 mg, 50%). **<sup>1</sup>H NMR** (300 MHz, CDCl<sub>3</sub>) δ 7.90-7.86 (m, 2H), 7.72-7.65 (m, 2H), 7.60-7.54 (m, 2H), 7.46-7.28 (m, 6H), 7.20-7.16 (m, 2H), 7.03-6.97 (m, 2H), 6.80-6.74 (m, 2H), 5.30-5.22 (m, 1H), 3.41-3.31 (m, 1H), 2.84-2.73 (m, 1H); **<sup>13</sup>C NMR** (75 MHz, CDCl<sub>3</sub>) δ 196.3 (d, *J* = 7.7 Hz), 165.5 (d, *J* = 253.9 Hz), 161.8 (d, *J* = 245.0 Hz), 133.8 (dd, *J* = 6.6, 3.3 Hz), 133.7, 132.6 (d, *J* = 36.8 Hz), 131.7 (dd, *J* = 7.1, 2.8 Hz), 131.44 (d, *J* = 18.2 Hz), 131.42 (d, *J* = 9.9 Hz), 130.5 (dd, *J* = 9.6, 5.8 Hz), 139.9 (d, *J* = 8.3 Hz), 128.4 (dd, *J* = 14.7, 11.5 Hz), 115.6 (dd, *J* = 21.7, 16.8 Hz), 45.7 (d, *J* = 1.7 Hz), 33.8 (d, *J* = 70.4 Hz); **<sup>31</sup>P NMR** (121.5 MHz, CDCl<sub>3</sub>) δ 29.91; **HRMS** (ESI) calculated for C<sub>27</sub>H<sub>22</sub>F<sub>2</sub>O<sub>2</sub>P [M+H]<sup>+</sup> *m/z* 447.1320, found 447.1323.

### 1,2-Bis(4-chlorophenyl)-3-(diphenylphosphoryl)propan-1-one (3fa)<sup>[4]</sup>

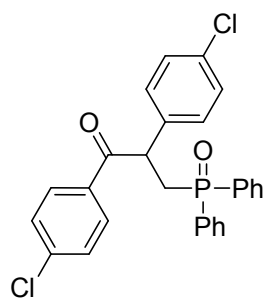

According to **GP** with 1,1-bis(4-chlorophenyl)prop-2-en-1-ol **1f** (55.9 mg, 0.2 mmol, 1.0 equiv), diphenylphosphine oxide **2a** (101.4 mg, 0.5 mmol, 2.5 equiv), and eosin Y (13.4 mg, 0.02 mmol, 0.1 equiv). The crude reaction mixture was purified by flash silica gel column chromatography (petroleum ether/EtOAc = 3/1) to afford the desired product **3fa** as white solid (70.0 mg, 73%). **<sup>1</sup>H NMR** (300 MHz, CDCl<sub>3</sub>) δ 7.79 (d, *J*

= 8.1 Hz, 2H), 7.73-7.66 (m, 2H), 7.60-7.53 (m, 2H), 7.39-7.27 (m, 8H), 7.13 (d,  $J$  = 8.1 Hz, 2H), 7.03 (d,  $J$  = 7.8 Hz, 2H), 5.28-5.21 (m, 1H), 3.42-3.31 (m, 1H), 2.84-2.74 (m, 1H);  $^{13}\text{C}$  NMR (75 MHz,  $\text{CDCl}_3$ )  $\delta$  196.3 (d,  $J$  = 7.7 Hz), 139.5, 136.3 (d,  $J$  = 6.6 Hz), 133.4 (d,  $J$  = 19.2 Hz), 132.4 (d,  $J$  = 29.6 Hz), 131.6 (d,  $J$  = 2.7 Hz), 131.3, 131.2 (d,  $J$  = 3.3 Hz), 130.4 (dd,  $J$  = 9.4, 3.3 Hz), 130.0, 129.6, 128.8 (d,  $J$  = 20.3 Hz), 128.3 (dd,  $J$  = 15.7, 11.8 Hz), 45.9 (d,  $J$  = 1.7 Hz), 33.5 (d,  $J$  = 70.3 Hz);  $^{31}\text{P}$  NMR (121.5 MHz,  $\text{CDCl}_3$ )  $\delta$  29.81; HRMS (ESI) calculated for  $\text{C}_{27}\text{H}_{22}\text{Cl}_2\text{O}_2\text{P}$   $[\text{M}+\text{H}]^+$   $m/z$  479.0729, found 479.0732.

### 1,2-Bis(4-bromophenyl)-3-(diphenylphosphoryl)propan-1-one (**3ga**)<sup>[4]</sup>

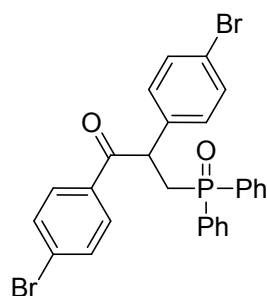

According to **GP** with 1,1-bis(4-bromophenyl)prop-2-en-1-ol **1g** (73.8 mg, 0.2 mmol, 1.0 equiv), diphenylphosphine oxide **2a** (101.3 mg, 0.5 mmol, 2.5 equiv), and eosin Y (13.5 mg, 0.02 mmol, 0.1 equiv). The crude reaction mixture was purified by flash silica gel column chromatography (petroleum ether/EtOAc = 3/1) to afford the desired product **3ga** as white solid (56.7 mg, 50%).  $^1\text{H}$  NMR (300 MHz,  $\text{CDCl}_3$ )  $\delta$  7.72-7.66 (m, 4H), 7.58-7.52 (m, 2H), 7.47-7.30 (m, 8H), 7.17 (d,  $J$  = 8.1 Hz, 2H), 7.06 (d,  $J$  = 8.1 Hz, 2H), 5.25-5.18 (m, 1H), 3.40-3.29 (m, 1H), 2.83-2.72 (m, 1H);  $^{13}\text{C}$  NMR (75 MHz,  $\text{CDCl}_3$ )  $\delta$  196.6 (d,  $J$  = 8.3 Hz), 136.8 (d,  $J$  = 6.5 Hz), 134.0, 133.1 (d,  $J$  = 74.2 Hz), 131.8 (d,  $J$  = 73.6 Hz), 132.3, 131.7, 131.3 (d,  $J$  = 2.8 Hz), 130.5 (dd,  $J$  = 9.6, 3.0 Hz), 130.2, 130.0, 128.4, 128.3 (dd,  $J$  = 12.4, 10.2 Hz), 121.6, 46.0 (d,  $J$  = 1.7 Hz), 33.5 (d,  $J$  = 70.3 Hz);  $^{31}\text{P}$  NMR (121.5 MHz,  $\text{CDCl}_3$ )  $\delta$  29.57; HRMS (ESI) calculated for  $\text{C}_{27}\text{H}_{22}\text{Br}_2\text{O}_2\text{P}$   $[\text{M}+\text{H}]^+$   $m/z$  566.9719, found 566.9727.

### 3-(Diphenylphosphoryl)-1,2-bis(4-methoxyphenyl)propan-1-one (3ha)<sup>[4]</sup>

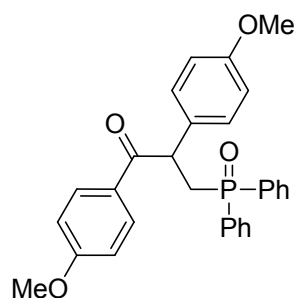

According to **GP** with 1,1-bis(4-methoxyphenyl)prop-2-en-1-ol **1h** (55.0 mg, 0.2 mmol, 1.0 equiv), diphenylphosphine oxide **2a** (101.0 mg, 0.5 mmol, 2.5 equiv), and eosin Y (13.3 mg, 0.02 mmol, 0.1 equiv). The crude reaction mixture was purified by flash silica gel column chromatography (petroleum ether/EtOAc = 2/1) to afford the desired product **3ha** as white solid (57.8 mg, 61%). **<sup>1</sup>H NMR** (300 MHz, CDCl<sub>3</sub>) δ 7.85 (d, *J* = 8.4 Hz, 2H), 7.71-7.65 (m, 2H), 7.60-7.54 (m, 2H), 7.43-7.27 (m, 6H), 7.13 (d, *J* = 8.1 Hz, 2H), 6.78 (d, *J* = 8.4 Hz, 2H), 6.59 (d, *J* = 8.4 Hz, 2H), 5.25-5.17 (m, 1H), 3.78 (s, 3H), 3.66 (s, 3H), 3.41-3.30 (m, 1H), 2.83-2.73 (m, 1H); **<sup>13</sup>C NMR** (75 MHz, CDCl<sub>3</sub>) δ 196.5 (d, *J* = 7.1 Hz), 163.2, 158.5, 131.5 (d, *J* = 2.2 Hz), 131.1, 131.0 (d, *J* = 2.2 Hz), 130.8, 130.6 (dd, *J* = 9.3, 3.8 Hz), 129.3, 128.5, 128.2 (dd, *J* = 13.2, 11.6 Hz), 114.1, 113.5, 55.3, 55.0, 45.3 (d, *J* = 1.7 Hz), 33.7 (d, *J* = 71.0 Hz); **<sup>31</sup>P NMR** (121.5 MHz, CDCl<sub>3</sub>) δ 30.45; **HRMS** (ESI) calculated for C<sub>29</sub>H<sub>28</sub>O<sub>4</sub>P [M+H]<sup>+</sup> *m/z* 471.1720, found 471.1726.

### 3-(Diphenylphosphoryl)-1-phenyl-2-(3-(trifluoromethyl)phenyl)propan-1-one (3ia) and 3-(diphenylphosphoryl)-2-phenyl-1-(3-(trifluoromethyl)phenyl)propan-1-one (3ia')<sup>[4]</sup>

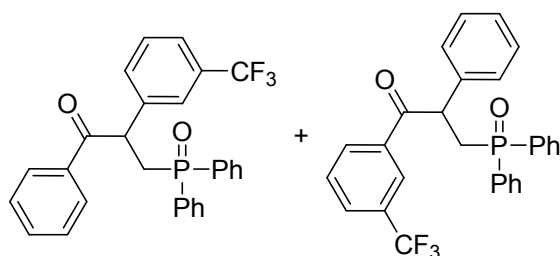

According to **GP** with 1-phenyl-1-(3-(trifluoromethyl)phenyl)prop-2-en-1-ol **1i** (56.0 mg, 0.2 mmol, 1.0 equiv), diphenylphosphine oxide **2a** (101.4 mg, 0.5 mmol, 2.5 equiv), and eosin Y (13.5 mg, 0.02 mmol, 0.1 equiv). The crude reaction mixture was purified by flash silica gel column chromatography (petroleum ether/EtOAc = 3/1) to



afford the desired product **3ia+3ia'** as colourless oil (55.0 mg, 57%, **3ia/3ia'** = 2.5:1). **<sup>1</sup>H NMR** (300 MHz, CDCl<sub>3</sub>) δ **3ia**: 7.89 (d, *J* = 7.5 Hz, 2H), 7.73-7.05 (m, 17H), 5.49-5.41 (m, 1H), 3.44-3.31 (m, 1H), 2.94-2.84 (m, 1H); **3ia'**: 8.07 (s, 1H), 8.03 (d, *J* = 8.1 Hz, 1H), 7.73-7.05 (m, 17H), 5.33-5.25 (m, 1H), 3.59-3.48 (m, 1H), 2.82-2.74 (m, 1H); **<sup>13</sup>C NMR** (75 MHz, CDCl<sub>3</sub>) **3ia+3ia'** CF<sub>3</sub>-signal could not be assigned δ 197.3 (d, *J* = 8.8 Hz), 196.4 (d, *J* = 6.0 Hz), 138.8 (d, *J* = 6.0 Hz), 137.7 (d, *J* = 8.3 Hz), 136.0, 135.0, 133.5, 133.1, 132.3 (d, *J* = 12.7 Hz), 131.9, 131.7, 131.3 (d, *J* = 2.7 Hz), 131.2 (d, *J* = 2.8 Hz), 130.6, 130.5 (d, *J* = 3.8 Hz), 130.4 (d, *J* = 2.8 Hz), 130.3 (d, *J* = 4.4 Hz), 129.2, 128.9, 128.6, 128.4, 128.3, 128.2 (d, *J* = 2.7 Hz), 128.0 (d, *J* = 3.9 Hz), 127.4, 125.3 (d, *J* = 3.7 Hz), 125.3, 124.9 (q, *J* = 3.7 Hz), 124.1 (q, *J* = 3.6 Hz), 121.6, 46.7 (d, *J* = 1.7 Hz), 46.0 (d, *J* = 1.7 Hz), 33.7 (d, *J* = 69.8 Hz), 33.5 (d, *J* = 70.4 Hz); **<sup>31</sup>P NMR** (121.5 MHz, CDCl<sub>3</sub>) **3ia+3ia'** δ 30.07, 29.62; **HRMS** (ESI) calculated for C<sub>28</sub>H<sub>23</sub>F<sub>3</sub>O<sub>2</sub>P [M+H]<sup>+</sup> *m/z* 479.1382, found 479.1385.

**3-(Diphenylphosphoryl)-1-phenyl-2-(pyridin-3-yl)propan-1-one (3ja) and 3-(diphenylphosphoryl)-2-phenyl-1-(pyridin-3-yl)propan-1-one (3ja')** <sup>[4]</sup>

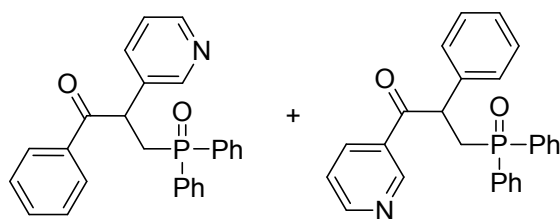

According to **GP** with 1-phenyl-1-(pyridin-3-yl)prop-2-en-1-ol **1j** (42.5 mg, 0.2 mmol, 1.0 equiv), diphenylphosphine oxide **2a** (101.5 mg, 0.5 mmol, 2.5 equiv), and eosin Y (13.2 mg, 0.02 mmol, 0.1 equiv). The crude reaction mixture was purified by flash silica gel column chromatography (dichloromethane/MeOH = 100/1) to afford the desired product **3ja+3ja'** as white solid (58.0 mg, 70%, **3ja/3ja'** = 2.9:1). **<sup>1</sup>H NMR** (300 MHz, CDCl<sub>3</sub>) δ **3ja**: 8.52 (s, 1H), 8.28 (d, *J* = 4.2 Hz, 1H), 7.86 (d, *J* = 7.8 Hz, 2H), 7.74-7.67 (m, 3H), 7.69-7.29 (m, 9H), 7.25-7.21 (m, 1H), 7.17-7.09 (m, 1H), 7.00-6.96 (m, 1H), 5.40-5.33 (m, 1H), 3.46-3.35 (m, 1H), 2.89-2.79 (m, 1H); **3ja'**: 9.02 (s, 1H), 8.63 (d, *J* = 3.9 Hz, 1H), 8.10 (d, *J* = 7.8 Hz, 1H), 7.69-7.29 (m, 15H), 7.17-7.09 (m, 1H), 5.26-5.17 (m, 1H), 3.59-3.49 (m, 1H), 2.75-2.70 (m, 1H); **<sup>13</sup>C NMR** (75 MHz, CDCl<sub>3</sub>) **3ja+3ja'** δ 197.3 (d, *J* = 7.7 Hz), 153.1, 150.0, 149.8, 148.6, 136.0, 135.6, 135.0, 134.0 (d, *J* = 6.6 Hz), 133.4, 132.6, 132.1, 131.8 (d, *J* = 2.8 Hz), 131.5 (d, *J* = 2.8 Hz), 130.8, 130.5 (dd, *J* = 9.3, 5.5 Hz), 130.6 (d, *J* = 9.4 Hz), 129.1, 128.8, 128.6, 128.5, 128.4, 128.3, 128.2, 123.5, 123.2, 43.9 (d, *J* = 1.7 Hz), 33.5 (d, *J*

= 69.8 Hz);  $^{31}\text{P}$  NMR (121.5 MHz,  $\text{CDCl}_3$ ) **3ja+3ja'**  $\delta$  30.10, 29.62; HRMS (ESI) calculated for  $\text{C}_{26}\text{H}_{22}\text{NO}_2\text{PNa}$   $[\text{M}+\text{Na}]^+$   $m/z$  434.1280, found 434.1281.

**1-(3,4-Dimethylphenyl)-3-(diphenylphosphoryl)-2-phenylpropan-1-one (3ka) and 2-(3,4-dimethylphenyl)-3-(diphenylphosphoryl)-1-phenylpropan-1-one (3ka')** <sup>[4]</sup>

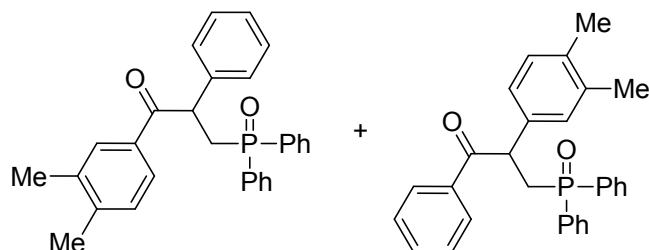

According to **GP** with 1-(3,4-dimethylphenyl)-1-phenylprop-2-en-1-ol **1k** (48.0 mg, 0.2 mmol, 1.0 equiv), diphenylphosphine oxide **2a** (101.4 mg, 0.5 mmol, 2.5 equiv), and eosin Y (13.4 mg, 0.02 mmol, 0.1 equiv). The crude reaction mixture was purified by flash silica gel column chromatography (petroleum ether/EtOAc = 3/1) to afford the desired product **3ka+3ka'** as white solid (60.0 mg, 68%, **3ka/3ka'** = 3.3:1).  $^1\text{H}$  NMR (300 MHz,  $\text{CDCl}_3$ )  $\delta$  **3ka**: 7.86-7.85 (m, 1H), 7.72-7.66 (m, 2H), 7.62-7.55 (m, 3H), 7.41-7.22 (m, 9H), 7.09-6.95 (m, 3H), 5.34-5.26 (m, 1H), 3.50-3.39 (m, 1H), 2.84-2.73 (m, 1H), 2.17 (s, 6H); **3ka'**: 7.72-7.66 (m, 2H), 7.62-7.55 (m, 3H), 7.41-7.22 (m, 9H), 7.09-6.95 (m, 3H), 6.84 (d,  $J$  = 7.5 Hz, 1H), 5.26-5.20 (m, 1H), 3.41-3.34 (m, 1H), 2.84-2.73 (m, 1H), 2.04 (s, 3H), 2.02 (s, 3H);  $^{13}\text{C}$  NMR (75 MHz,  $\text{CDCl}_3$ )  $\delta$  **3ka+3ka'**  $\delta$  197.8 (d,  $J$  = 7.1 Hz), 197.6 (d,  $J$  = 7.1 Hz), 142.4, 138.7 (d,  $J$  = 6.6 Hz), 136.9, 136.5, 135.62 (d,  $J$  = 7.2 Hz), 135.55 (d,  $J$  = 8.8 Hz), 133.8, 133.4, 133.1 (d,  $J$  = 2.8 Hz), 132.7, 132.5, 131.4 (d,  $J$  = 2.7 Hz), 131.2 (d,  $J$  = 2.7 Hz), 130.7, 130.6 (d,  $J$  = 9.4 Hz), 130.5, 130.4, 129.8, 129.44, 129.42, 128.7, 128.4, 128.22, 128.20, 128.16, 128.1, 128.0, 127.9 (d,  $J$  = 11.6 Hz), 127.0, 126.5, 125.5, 46.2 (d,  $J$  = 1.7 Hz), 46.1 (d,  $J$  = 2.2 Hz), 33.8 (d,  $J$  = 70.4 Hz), 33.6 (d,  $J$  = 70.3 Hz), 19.8, 19.54, 19.49, 19.1;  $^{31}\text{P}$  NMR (121.5 MHz,  $\text{CDCl}_3$ ) **3ka+3ka'**  $\delta$  30.4, 30.3; HRMS (ESI) calculated for  $\text{C}_{29}\text{H}_{28}\text{O}_2\text{P}$   $[\text{M}+\text{H}]^+$   $m/z$  439.1821, found 439.1827.

**10-((Diphenylphosphoryl)methyl)-10-phenylphenanthren-9(10*H*)-one (3la)**

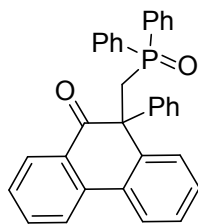

According to **GP** with 9-(1-phenylvinyl)-9*H*-fluoren-9-ol **11** (57.1 mg, 0.2 mmol, 1.0 equiv), diphenylphosphine oxide **2a** (101.2 mg, 0.5 mmol, 2.5 equiv), and eosin Y (13.2 mg, 0.02 mmol, 0.1 equiv). The crude reaction mixture was purified by flash silica gel column chromatography (petroleum ether/EtOAc = 3/1) to afford the desired product **3la** as white solid (40.1 mg, 41%). **<sup>1</sup>H NMR** (300 MHz, CDCl<sub>3</sub>) δ 8.02-7.97 (m, 3H), 7.61-7.51 (m, 5H), 7.45-7.40 (m, 1H), 7.36-7.20 (m, 7H), 7.11-7.08 (m, 5H), 7.03 (d, *J* = 7.8 Hz, 1H), 6.86 (d, *J* = 7.7 Hz, 1H), 4.61-4.53 (m, 1H), 3.45-3.37 (m, 1H); **<sup>13</sup>C NMR** (75 MHz, CDCl<sub>3</sub>) δ 197.7 (d, *J* = 1.1 Hz), 142.7, 142.5, 138.8 (d, *J* = 2.8 Hz), 136.9, 134.4 (d, *J* = 7.7 Hz), 134.2, 133.1 (d, *J* = 8.3 Hz), 131.2 (d, *J* = 2.8 Hz), 131.1 (d, *J* = 9.3 Hz), 130.8, 130.6 (d, *J* = 7.1 Hz), 128.5, 128.4 (d, *J* = 7.1 Hz), 128.2, 128.1 (d, *J* = 2.3 Hz), 128.0, 127.7, 127.2, 127.0, 123.4, 122.9, 56.3 (d, *J* = 2.7 Hz), 40.5 (d, *J* = 69.2 Hz); **<sup>31</sup>P NMR** (121.5 MHz, CDCl<sub>3</sub>) δ 26.66; **HRMS** (ESI) calculated for C<sub>33</sub>H<sub>26</sub>O<sub>2</sub>P [M+H]<sup>+</sup> *m/z* 485.1665, found 485.1668.

### 3-(Bis(4-(*tert*-butyl)phenyl)phosphoryl)-1,2-diphenylpropan-1-one (**3ab**)

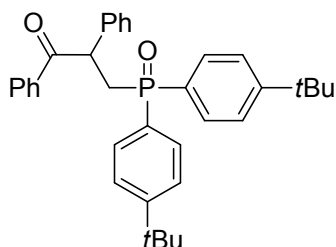

According to **GP** with 1,1-diphenylprop-2-en-1-ol **1a** (42.3 mg, 0.2 mmol, 1.0 equiv), bis(4-(*tert*-butyl)phenyl)phosphine oxide **2b** (151.2 mg, 0.5 mmol, 2.5 equiv), and eosin Y (13.2 mg, 0.02 mmol, 0.1 equiv). The crude reaction mixture was purified by flash silica gel column chromatography (petroleum ether/EtOAc = 4/1) to afford the desired product **3ab** as white solid (80.1 mg, 77%). **<sup>1</sup>H NMR** (300 MHz, CDCl<sub>3</sub>) δ 7.82 (d, *J* = 7.5 Hz, 2H), 7.66-7.50 (m, 4H), 7.41-7.21 (m, 9H), 7.09-6.98 (m, 3H), 5.34-5.26 (m, 1H), 3.49-3.38 (m, 1H), 2.82-2.70 (m, 1H), 1.27 (s, 9H), 1.23 (s, 9H); **<sup>13</sup>C NMR** (75 MHz, CDCl<sub>3</sub>) δ 197.9 (d, *J* = 6.6 Hz), 154.8 (d, *J* = 2.8 Hz), 154.4 (d, *J* = 2.8 Hz), 138.5 (d, *J* = 7.2 Hz), 135.6, 132.7, 130.5 (dd, *J* = 16.2, 9.7 Hz), 130.0 (d, *J*

= 43.4 Hz), 128.7 (d,  $J$  = 44.0 Hz), 128.7, 128.2 (d,  $J$  = 7.2 Hz), 127.0, 124.7 (dd,  $J$  = 11.6, 7.1 Hz), 46.3 (d,  $J$  = 1.1 Hz), 34.7, 34.6, 34.1 (d,  $J$  = 70.4 Hz), 30.89, 30.86;  **$^{31}\text{P}$  NMR** (121.5 MHz,  $\text{CDCl}_3$ )  $\delta$  30.2; **HRMS** (ESI) calculated for  $\text{C}_{35}\text{H}_{40}\text{O}_2\text{P}$   $[\text{M}+\text{H}]^+$   $m/z$  523.2760, found 523.2770.

### 3-(Bis(4-chlorophenyl)phosphoryl)-1,2-diphenylpropan-1-one (3ac)

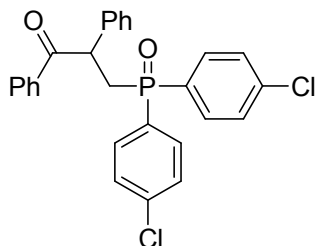

According to **GP** with 1,1-diphenylprop-2-en-1-ol **1a** (42.5 mg, 0.2 mmol, 1.0 equiv), bis(4-chlorophenyl)phosphine oxide **2c** (135.6 mg, 0.5 mmol, 2.5 equiv), and eosin Y (13.4 mg, 0.02 mmol, 0.1 equiv). The crude reaction mixture was purified by flash silica gel column chromatography (petroleum ether/EtOAc = 3/1) to afford the desired product **3ac** as white solid (45.8 mg, 48%).  **$^1\text{H}$  NMR** (300 MHz,  $\text{CDCl}_3$ )  $\delta$  7.84 (d,  $J$  = 7.8 Hz, 2H), 7.63-7.57 (m, 2H), 7.51-7.41 (m, 3H), 7.34-7.26 (m, 6H), 7.22 (d,  $J$  = 7.2 Hz, 2H), 7.13-7.05 (m, 3H), 5.32-5.24 (m, 1H), 3.45-3.34 (m, 1H), 2.82-2.72 (m, 1H);  **$^{13}\text{C}$  NMR** (75 MHz,  $\text{CDCl}_3$ )  $\delta$  197.7 (d,  $J$  = 7.1 Hz), 138.5 (d,  $J$  = 3.3 Hz), 138.11 (d,  $J$  = 3.3 Hz), 138.07 (d,  $J$  = 7.1 Hz), 135.4, 133.1, 132.0 (dd,  $J$  = 13.5, 10.2 Hz), 130.9 (d,  $J$  = 56.0 Hz), 129.0, 128.9, 128.8, 128.6, 128.3 (d,  $J$  = 8.8 Hz), 127.4, 46.4 (d,  $J$  = 1.7 Hz), 33.7 (d,  $J$  = 71.5 Hz);  **$^{31}\text{P}$  NMR** (121.5 MHz,  $\text{CDCl}_3$ )  $\delta$  29.4; **HRMS** (ESI) calculated for  $\text{C}_{27}\text{H}_{21}\text{Cl}_2\text{O}_2\text{PNa}$   $[\text{M}+\text{Na}]^+$   $m/z$  501.0548, found 501.0553.

### 3-(Di(naphthalen-2-yl)phosphoryl)-1,2-diphenylpropan-1-one (3ad)

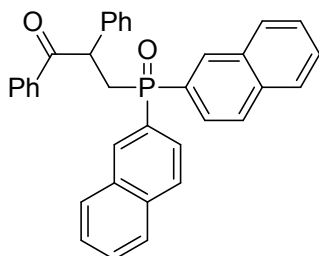

According to **GP** with 1,1-diphenylprop-2-en-1-ol **1a** (42.7 mg, 0.2 mmol, 1.0 equiv), di(naphthalen-2-yl)phosphine oxide **2d** (151.2 mg, 0.5 mmol, 2.5 equiv), and eosin Y (13.4 mg, 0.02 mmol, 0.1 equiv). The crude reaction mixture was purified by flash

silica gel column chromatography (petroleum ether/EtOAc = 4/1) to afford the desired product **3ad** as white solid (50.2 mg, 49%). **<sup>1</sup>H NMR** (300 MHz, CDCl<sub>3</sub>) δ 8.36-8.25 (m, 2H), 7.83-7.74 (m, 8H), 7.68-7.44 (m, 6H), 7.38-7.17 (m, 5H), 7.05-7.01 (m, 2H), 6.95-6.90 (m, 1H), 5.42-5.34 (m, 1H), 3.71-3.61 (m, 1H), 3.00-2.90 (m, 1H); **<sup>13</sup>C NMR** (75 MHz, CDCl<sub>3</sub>) δ 197.9 (d, *J* = 6.6 Hz), 138.5 (d, *J* = 7.7 Hz), 135.5, 134.4 (d, *J* = 2.7 Hz), 134.3 (d, *J* = 2.2 Hz), 132.9, 132.8 (d, *J* = 3.8 Hz), 132.7 (d, *J* = 4.4 Hz), 132.4, 132.2, 130.5 (d, *J* = 35.7 Hz), 129.2 (d, *J* = 35.2 Hz), 128.83, 128.76, 128.7, 128.3, 128.2 (d, *J* = 9.9 Hz), 128.1, 128.0, 127.7, 127.6, 127.3, 126.7, 125.7 (d, *J* = 10.4 Hz), 125.5 (d, *J* = 11.0 Hz), 46.6 (d, *J* = 1.7 Hz), 33.8 (d, *J* = 70.4 Hz); **<sup>31</sup>P NMR** (121.5 MHz, CDCl<sub>3</sub>) δ 30.60; **HRMS** (ESI) calculated for C<sub>35</sub>H<sub>27</sub>O<sub>2</sub>PNa [M+Na]<sup>+</sup> *m/z* 533.1641, found 533.1644.

### 3-(Di-*m*-tolylphosphoryl)-1,2-diphenylpropan-1-one (**3ae**)

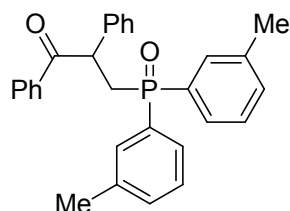

According to **GP** with 1,1-diphenylprop-2-en-1-ol **1a** (42.4 mg, 0.2 mmol, 1.0 equiv), di-*m*-tolylphosphine oxide **2e** (115.2 mg, 0.5 mmol, 2.5 equiv), and eosin Y (13.2 mg, 0.02 mmol, 0.1 equiv). The crude reaction mixture was purified by flash silica gel column chromatography (petroleum ether/EtOAc = 3/1) to afford the desired product **3ae** as colourless oil (70.0 mg, 80%). **<sup>1</sup>H NMR** (300 MHz, CDCl<sub>3</sub>) δ 7.84 (d, *J* = 7.8 Hz, 2H), 7.54 (d, *J* = 12.0 Hz, 1H), 7.44-7.37 (m, 4H), 7.33-7.20 (m, 8H), 7.14-7.02 (m, 3H), 5.34-5.26 (m, 1H), 3.50-3.39 (m, 1H), 2.80-2.70 (m, 1H), 2.27 (s, 3H), 2.24 (s, 3H); **<sup>13</sup>C NMR** (75 MHz, CDCl<sub>3</sub>) δ 197.9 (d, *J* = 6.6 Hz), 138.6 (d, *J* = 7.7 Hz), 138.2 (d, *J* = 11.6 Hz), 138.1 (d, *J* = 11.6 Hz), 135.6, 133.2 (d, *J* = 47.3 Hz), 132.9, 132.2 (dd, *J* = 13.2, 2.8 Hz), 131.9 (d, *J* = 46.7 Hz), 131.2 (dd, *J* = 10.7, 9.1 Hz), 128.8, 128.3, 128.2 (dd, *J* = 12.7, 6.6 Hz), 127.6 (dd, *J* = 9.9, 7.8 Hz), 127.2, 46.4 (d, *J* = 1.6 Hz), 33.9 (d, *J* = 69.8 Hz), 21.2 (d, *J* = 2.8 Hz); **<sup>31</sup>P NMR** (121.5 MHz, CDCl<sub>3</sub>) δ 30.69; **HRMS** (ESI) calculated for C<sub>29</sub>H<sub>28</sub>O<sub>2</sub>P [M+H]<sup>+</sup> *m/z* 439.1821, found 439.1826.

### 3-(Di-*o*-tolylphosphoryl)-1,2-diphenylpropan-1-one (3af)

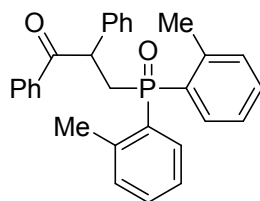

According to **GP** with 1,1-diphenylprop-2-en-1-ol **1a** (42.8 mg, 0.2 mmol, 1.0 equiv), di-*o*-tolylphosphine oxide **2f** (115.6 mg, 0.5 mmol, 2.5 equiv), and eosin Y (13.4 mg, 0.02 mmol, 0.1 equiv). The crude reaction mixture was purified by flash silica gel column chromatography (petroleum ether/EtOAc = 3/1) to afford the desired product **3af** as colourless oil (72.6 mg, 83%). **<sup>1</sup>H NMR** (300 MHz, CDCl<sub>3</sub>) δ 7.86-7.68 (m, 4H), 7.43-7.38 (m, 1H), 7.35-7.26 (m, 6H), 7.23-7.13 (m, 4H), 7.11-7.06 (m, 3H), 5.35-5.26 (m, 1H), 3.81-3.70 (m, 1H), 2.85-2.75 (m, 1H), 2.21 (s, 3H), 2.16 (s, 3H); **<sup>13</sup>C NMR** (75 MHz, CDCl<sub>3</sub>) δ 197.5 (d, *J* = 4.4 Hz), 141.3 (dd, *J* = 19.5, 9.1 Hz), 139.1 (d, *J* = 8.8 Hz), 135.6, 132.8, 132.4 (d, *J* = 9.8 Hz), 131.8-131.4 (m), 130.3 (d, *J* = 27.6 Hz), 128.9, 128.7, 128.2, 128.1, 127.2, 125.4 (dd, *J* = 11.6, 1.7 Hz), 46.0 (d, *J* = 1.1 Hz), 32.5 (d, *J* = 69.8 Hz), 21.1 (d, *J* = 4.4 Hz), 21.0 (d, *J* = 4.4 Hz); **<sup>31</sup>P NMR** (121.5 MHz, CDCl<sub>3</sub>) δ 30.58; **HRMS** (ESI) calculated for C<sub>29</sub>H<sub>28</sub>O<sub>2</sub>P [M+H]<sup>+</sup> *m/z* 439.1821, found 439.1827.

### 3-(Butyl(phenyl)phosphoryl)-1,2-diphenylpropan-1-one (3ag)

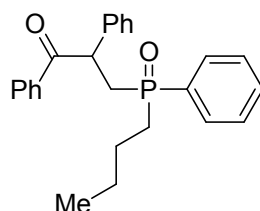

According to **GP** with 1,1-diphenylprop-2-en-1-ol **1a** (42.5 mg, 0.2 mmol, 1.0 equiv), butyl(phenyl)phosphine oxide **2g** (91.4 mg, 0.5 mmol, 2.5 equiv), and eosin Y (13.4 mg, 0.02 mmol, 0.1 equiv). The crude reaction mixture was purified by flash silica gel column chromatography (petroleum ether/EtOAc = 3/1) to afford the desired product **3ag** as colourless oil (40.2 mg, 51%, d.r. = 1:1). **<sup>1</sup>H NMR** (300 MHz, CDCl<sub>3</sub>) δ 7.98 (d, *J* = 7.8 Hz, 2H), 7.81 (d, *J* = 8.1 Hz, 2H), 7.68-7.62 (m, 2H), 7.55-7.49 (m, 2H), 7.43-7.28 (m, 14H), 7.22-7.15 (m, 4H), 7.08-6.97 (m, 4H), 5.28-5.18 (m, 2H), 3.18-3.07 (m, 1H), 3.04-2.93 (m, 1H), 2.55-2.47 (m, 1H), 2.44-2.34 (m, 1H), 1.97-1.78 (m, 2H), 1.65-1.43 (m, 4H), 1.19-1.23 (m, 6H), 0.79 (d, *J* = 6.9 Hz, 3H), 0.74 (d, *J* = 6.9 Hz, 3H); **<sup>13</sup>C NMR** (75 MHz, CDCl<sub>3</sub>) δ 198.2 (d, *J* = 6.6 Hz), 197.7 (d, *J* = 7.2 Hz),

138.8 (d,  $J = 7.1$  Hz), 138.2 (d,  $J = 7.7$  Hz), 135.43, 135.37, 132.9, 132.8, 132.7, 131.7, 131.5, 131.2 (d,  $J = 2.7$  Hz), 130.8 (d,  $J = 2.8$  Hz), 130.2 (d,  $J = 8.8$  Hz), 129.8 (d,  $J = 8.8$  Hz), 129.8 (d,  $J = 8.8$  Hz), 128.9, 128.7, 128.6, 128.5, 128.21, 128.18, 128.10, 128.0, 127.9, 127.3, 127.0, 46.6 (d,  $J = 2.2$  Hz), 46.2 (d,  $J = 1.7$  Hz), 33.9 (d,  $J = 65.9$  Hz), 33.5 (d,  $J = 65.9$  Hz), 30.6 (d,  $J = 68.2$  Hz), 29.7 (d,  $J = 68.2$  Hz), 23.62 (d,  $J = 14.8$  Hz), 23.55 (d,  $J = 15.5$  Hz), 23.11, 23.05, 13.2, 13.1;  $^{31}\text{P}$  NMR (121.5 MHz,  $\text{CDCl}_3$ )  $\delta$  39.25, 38.92; HRMS (ESI) calculated for  $\text{C}_{25}\text{H}_{28}\text{O}_2\text{P}$   $[\text{M}+\text{H}]^+$   $m/z$  391.1821, found 391.1823.

### Ethyl (3-oxo-2,3-diphenylpropyl)(phenyl)phosphinate (**3ah**)<sup>[4]</sup>

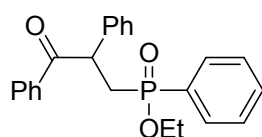

According to **GP** with 1,1-diphenylprop-2-en-1-ol **1a** (42.4 mg, 0.2 mmol, 1.0 equiv), ethyl phenylphosphinate **2h** (177.4 mg, 0.5 mmol, 2.5 equiv), and eosin Y (13.2 mg, 0.02 mmol, 0.1 equiv). The crude reaction mixture was purified by flash silica gel column chromatography (petroleum ether/EtOAc = 4/1) to afford the desired product **3ah** as colourless oil (60.0 mg, 79%, d.r. = 1:1).  $^1\text{H}$  NMR (300 MHz,  $\text{CDCl}_3$ )  $\delta$  8.01 (d,  $J = 7.5$  Hz, 2H), 7.87 (d,  $J = 7.5$  Hz, 2H), 7.74-7.64 (m, 4H), 7.50-7.23 (m, 18H), 7.19-7.03 (m, 4H), 5.26-5.20 (m, 2H), 3.96-3.84 (m, 2H), 3.79-3.65 (m, 2H), 3.25-3.12 (m, 1H), 3.07-2.95 (m, 1H), 2.52-2.32 (m, 2H), 1.10 (t,  $J = 7.4$  Hz, 3H), 1.05 (t,  $J = 7.7$  Hz, 3H);  $^{13}\text{C}$  NMR (75 MHz,  $\text{CDCl}_3$ )  $\delta$  197.8 (d,  $J = 6.6$  Hz), 197.6 (d,  $J = 6.6$  Hz), 138.9 (d,  $J = 9.9$  Hz), 138.2 (d,  $J = 9.9$  Hz), 135.9, 135.7, 132.9, 132.2 (d,  $J = 2.8$  Hz), 132.0 (d,  $J = 2.8$  Hz), 131.6, 131.5, 131.4, 129.8 (d,  $J = 19.3$  Hz), 128.9, 128.8, 128.7, 128.7, 128.5, 128.4, 128.31, 128.27, 128.2, 127.3, 127.2, 60.43 (d,  $J = 6.6$  Hz), 60.39 (d,  $J = 6.1$  Hz), 46.9 (d,  $J = 1.1$  Hz), 46.5 (d,  $J = 1.7$  Hz), 34.0 (d,  $J = 98.9$  Hz), 33.8 (d,  $J = 98.9$  Hz), 16.1 (d,  $J = 6.6$  Hz), 16.0 (d,  $J = 6.6$  Hz);  $^{31}\text{P}$  NMR (121.5 MHz,  $\text{CDCl}_3$ )  $\delta$  42.37, 42.07; HRMS (ESI) calculated for  $\text{C}_{23}\text{H}_{24}\text{O}_3\text{P}$   $[\text{M}+\text{H}]^+$   $m/z$  379.1458, found 379.1458.

### 3-(Dipropylphosphoryl)-1,2-diphenylpropan-1-one (**3ai**)

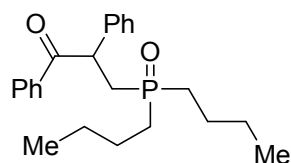

According to **GP** with 1,1-diphenylprop-2-en-1-ol **1a** (42.3 mg, 0.2 mmol, 1.0 equiv),

dipropylphosphine oxide **2i** (81.2 mg, 0.5 mmol, 2.5 equiv), and eosin Y (13.6 mg, 0.02 mmol, 0.1 equiv). The crude reaction mixture was purified by flash silica gel column chromatography (petroleum ether/EtOAc = 4/1) to afford the desired product **3ai** as colourless oil (25.1 mg, 34%). **<sup>1</sup>H NMR** (300 MHz, CDCl<sub>3</sub>) δ 8.01 (d, *J* = 7.8 Hz, 2H), 7.49-7.35 (m, 5H), 7.33-7.26 (m, 2H), 7.22-7.17 (m, 1H), 5.28-5.21 (m, 1H), 2.78-2.67 (m, 1H), 2.20-2.10 (m, 1H), 1.68-1.46 (m, 6H), 1.41-1.19 (m, 6H), 0.89 (d, *J* = 7.1 Hz, 3H), 0.80 (d, *J* = 6.9 Hz, 3H); **<sup>13</sup>C NMR** (75 MHz, CDCl<sub>3</sub>) δ 198.3 (d, *J* = 6.6 Hz), 138.9 (d, *J* = 6.6 Hz), 135.4, 132.9, 128.9, 128.7, 128.24, 128.17, 127.3, 46.5 (d, *J* = 2.3 Hz), 31.0 (d, *J* = 63.2 Hz), 31.0 (d, *J* = 64.9 Hz), 28.1 (d, *J* = 64.3 Hz), 23.9 (d, *J* = 8.9 Hz), 23.7 (d, *J* = 8.8 Hz), 23.5 (d, *J* = 3.3 Hz), 23.3 (d, *J* = 3.8 Hz), 13.3, 13.2; **<sup>31</sup>P NMR** (121.5 MHz, CDCl<sub>3</sub>) δ 48.26; **HRMS** (ESI) calculated for C<sub>23</sub>H<sub>32</sub>O<sub>2</sub>P [M+Na]<sup>+</sup> *m/z* 371.2134, found 371.2134.

### Larger scale experiment

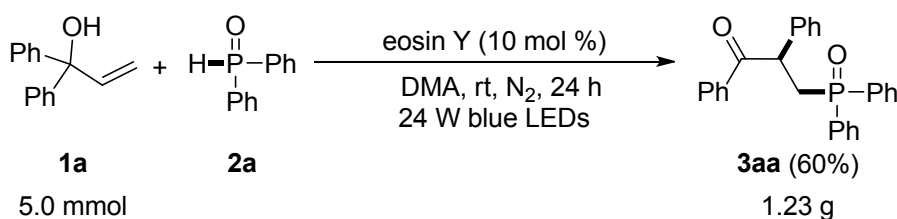

1,1-Diphenylprop-2-en-1-ol **1a** (1.05 g, 5.0 mmol, 1.0 equiv), diphenylphosphine oxide **2a** (2.50 g, 12.5 mmol, 2.5 equiv), and eosin Y (0.32 g, 0.5 mmol, 0.1 equiv) were placed in a dry 100 mL Schlenk tube under a nitrogen atmosphere. Then DMA (20.0 mL) was added. The reaction mixture was stirred and irradiated by 24 W blue LEDs (450 nm) at room temperature for 24 h. After the reaction was completed monitored by TLC, H<sub>2</sub>O (50.0 mL) was added, and the mixture was extracted by EtOAc (3x50.0 mL). The combined organic layer was dried over anhydrous Na<sub>2</sub>SO<sub>4</sub>, filtered, and concentrated by rotary evaporation. The crude reaction mixture was purified by flash silica gel column chromatography (petroleum ether/EtOAc = 3/1) to afford the desired product **3aa** (1.23g, 60%).



## Mechanistic studies

### Radical inhibition experiments:

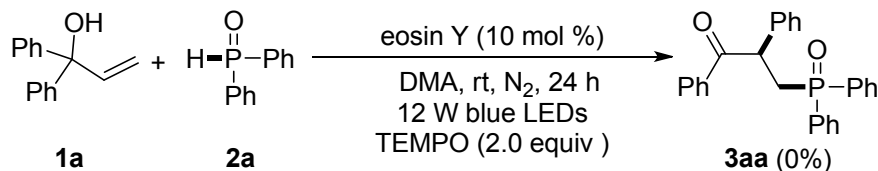

1,1-Diphenylprop-2-en-1-ol **1a** (42.5 mg, 0.2 mmol, 1.0 equiv), diphenylphosphine oxide **2a** (101.2 mg, 0.5 mmol, 2.5 equiv), eosin Y (13.1 mg, 0.02 mmol, 0.1 equiv), and 2,2,6,6-tetramethyl-1-piperidinyloxy (TEMPO) (62.4 mg, 0.4 mmol, 2.0 equiv) were placed in a dry 10 mL Schlenk tube under a nitrogen atmosphere. Then DMA (2.0 mL) was added. The reaction mixture was stirred and irradiated by 12 W blue LEDs (450 nm) at room temperature for 24 h. In this reaction, the formation of **3aa** was completely suppressed.

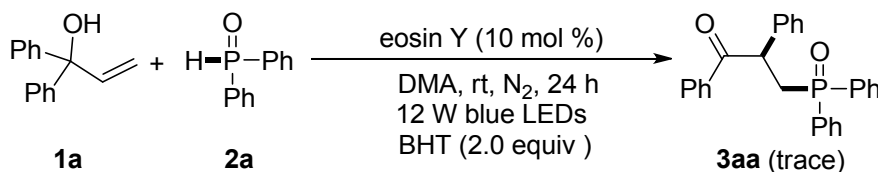

1,1-Diphenylprop-2-en-1-ol **1a** (43.0 mg, 0.2 mmol, 1.0 equiv), diphenylphosphine oxide **2a** (101.3 mg, 0.5 mmol, 2.5 equiv), eosin Y (13.4 mg, 0.02 mmol, 0.1 equiv), and 2,6-di-*tert*-butyl-4-methylphenol (BHT) (88.1 mg, 0.6 mmol, 2.0 equiv) were placed in a dry 10 mL Schlenk tube under a nitrogen atmosphere. Then DMA (2.0 mL) was added. The reaction mixture was stirred and irradiated by 12 W blue LEDs (450 nm) at room temperature for 24 h. In this reaction, only traces of the desired product **3aa** were observed.

### Radical trapping experiments:

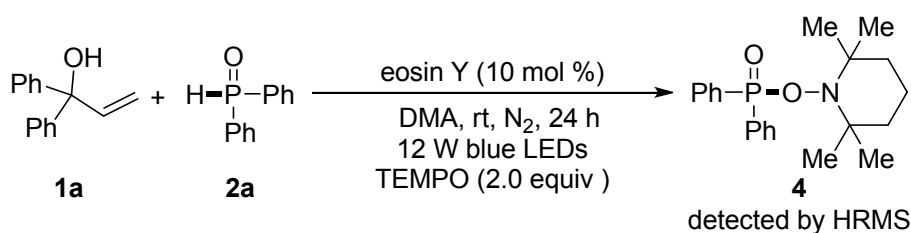

1,1-Diphenylprop-2-en-1-ol **1a** (42.6 mg, 0.2 mmol, 1.0 equiv), diphenylphosphine

oxide **2a** (101.8 mg, 0.5 mmol, 2.5 equiv), eosin Y (13.2 mg, 0.02 mmol, 0.1 equiv), and 2,2,6,6-tetramethyl-1-piperidinyloxy (TEMPO) (62.5 mg, 0.4 mmol, 2.0 equiv) were placed in a dry 10 mL Schlenk tube under a nitrogen atmosphere. Then DMA (2.0 mL) was added. The reaction mixture was stirred and irradiated by 12 W blue LEDs (450 nm) at room temperature for 24 h. High-resolution mass spectra analysis of this reaction mixture showed that TEMPO-trapped product **4** was formed.

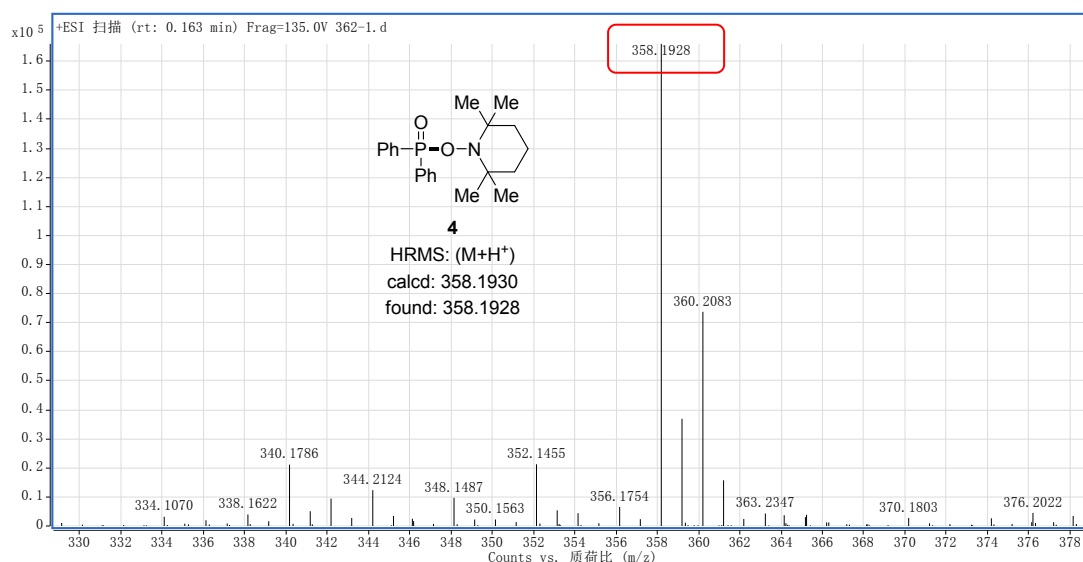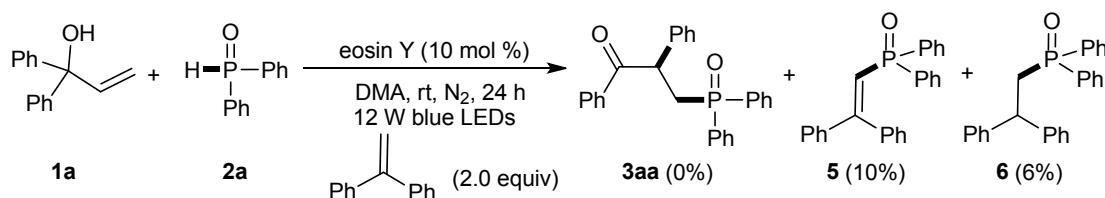

1,1-Diphenylprop-2-en-1-ol **1a** (42.5 mg, 0.2 mmol, 1.0 equiv), diphenylphosphine oxide **2a** (101.6 mg, 0.5 mmol, 2.5 equiv), eosin Y (13.5 mg, 0.02 mmol, 0.1 equiv), and ethene-1,1-diyl dibenzene (71  $\mu$ L, 0.4 mmol, 2.0 equiv) were placed in a dry 10 mL Schlenk tube under a nitrogen atmosphere. Then DMA (2.0 mL) was added. The reaction mixture was stirred and irradiated by 12 W blue LEDs (450 nm) at room temperature for 24 h. After the reaction was completed monitored by TLC, H<sub>2</sub>O (10.0 mL) was added, and the mixture was extracted by EtOAc (3x10.0 mL). The combined organic layer was dried over anhydrous Na<sub>2</sub>SO<sub>4</sub>, filtered, and concentrated by rotary evaporation. The crude reaction mixture was purified by flash silica gel column chromatography (petroleum ether/EtOAc = 3/1) to afford the product **5** and **6** (24.0 mg, **5/6** = 1.86:1).<sup>[5,6]</sup>

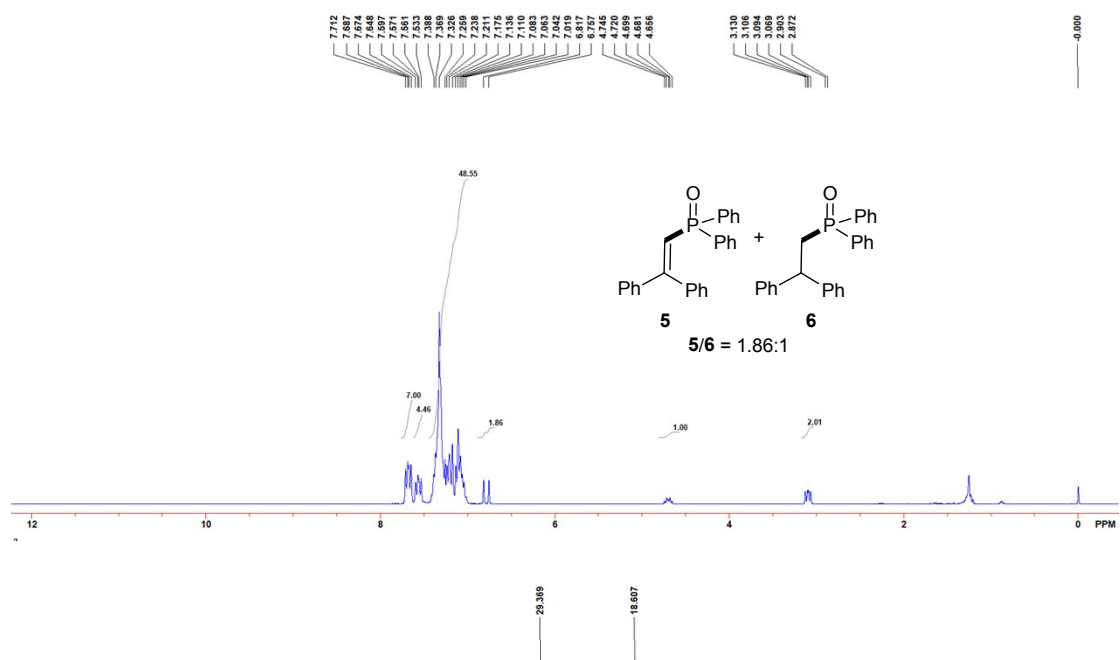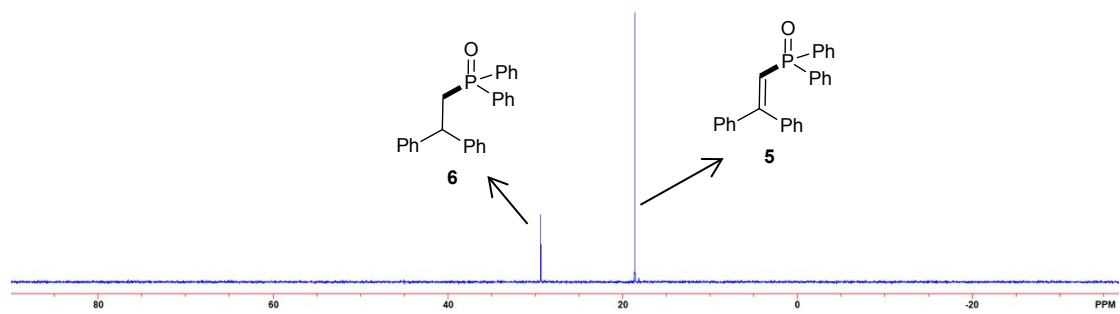

## Crystallographic data of 3la (CCDC: 1811785)

Datablock mo\_20171213YKD\_ZB\_0m\_a - ellipsoid plot

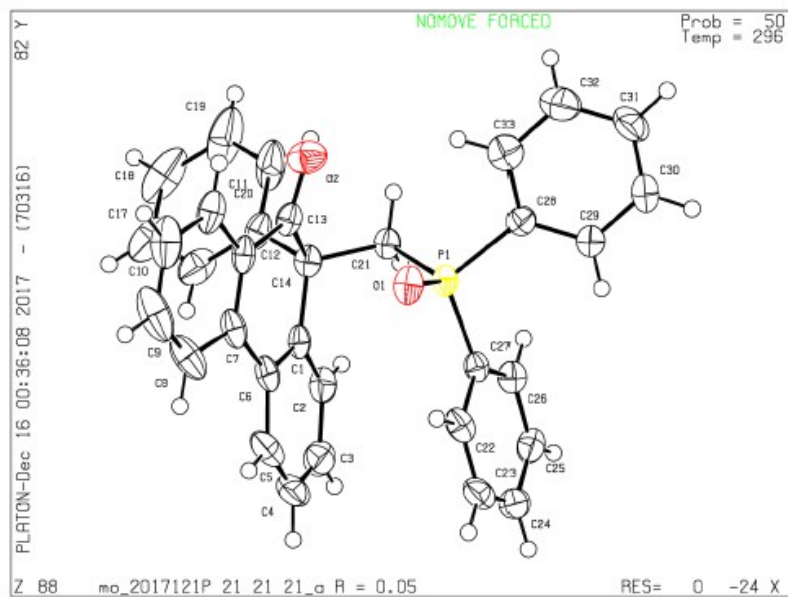

No syntax errors found.

[CIF dictionary](#)

[Interpreting this report](#)

### Datablock: mo\_20171213YKD\_ZB\_0m\_a

Bond precision: C-C = 0.0062 Å

Wavelength=0.71073

Cell: a=11.149 (2)

b=11.921 (2)

c=18.456 (4)

alpha=90

beta=90

gamma=90

Temperature: 296 K

|                        | Calculated    | Reported     |
|------------------------|---------------|--------------|
| Volume                 | 2452.9 (8)    | 2452.8 (9)   |
| Space group            | P 21 21 21    | P 21 21 21   |
| Hall group             | P 2ac 2ab     | P 2ac 2ab    |
| Moiety formula         | C33 H25 O2 P  | ?            |
| Sum formula            | C33 H25 O2 P  | C33 H25 O2 P |
| Mr                     | 484.50        | 484.50       |
| Dx, g cm <sup>-3</sup> | 1.312         | 1.312        |
| Z                      | 4             | 4            |
| Mu (mm <sup>-1</sup> ) | 0.142         | 0.142        |
| F000                   | 1016.0        | 1016.0       |
| F000'                  | 1016.81       |              |
| h, k, lmax             | 13, 14, 21    | 13, 14, 21   |
| Nref                   | 4335 [ 2466 ] | 4296         |
| Tmin, Tmax             | 0.969, 0.975  |              |
| Tmin'                  | 0.969         |              |

Correction method= Not given

Data completeness= 1.74/0.99

Theta(max)= 25.010

R(reflections)= 0.0459 ( 3943)

wR2(reflections)= 0.1304 ( 4296)

S = 1.033

Npar= 325

## ***References:***

- [1] Liu, X.; Xiong, F.; Huang, X.; Xu, L.; Li, P.; Wu, X. *Angew. Chem. Int. Ed.* **2013**, *52*, 6962.
- [2] Busacca, C. A.; Lorenz, J. C.; Grinberg, N.; Haddad, N.; Hrapchak, M.; Latli, B.; Lee, H.; Sabila, P.; Saha, A.; Sarvestani, M.; Shen, S.; Varsolona, R.; Wei, X.; Senanayake, C. H. *Org. Lett.* **2005**, *7*, 4277.
- [3] Keglevich, G.; Jablonkai, E.; Balázs, L. B. *RSC Adv.* **2014**, *4*, 22808.
- [4] Chu, X.-Q.; Zi, Y.; Meng, H.; Xu, X.-P.; Ji, S.-J. *Chem. Commun.* **2014**, *50*, 7642.
- [5] Zhang, H.-Y.; Mao, L.-L.; Yang, B.; Yang, S.-D. *Chem. Commun.* **2015**, *51*, 4101.
- [6] Isley, N. A.; Linstadt, R. T. H.; Slack, E. D.; Lipshutz, B. H. *Dalton Trans.* **2014**, *43*, 13196.

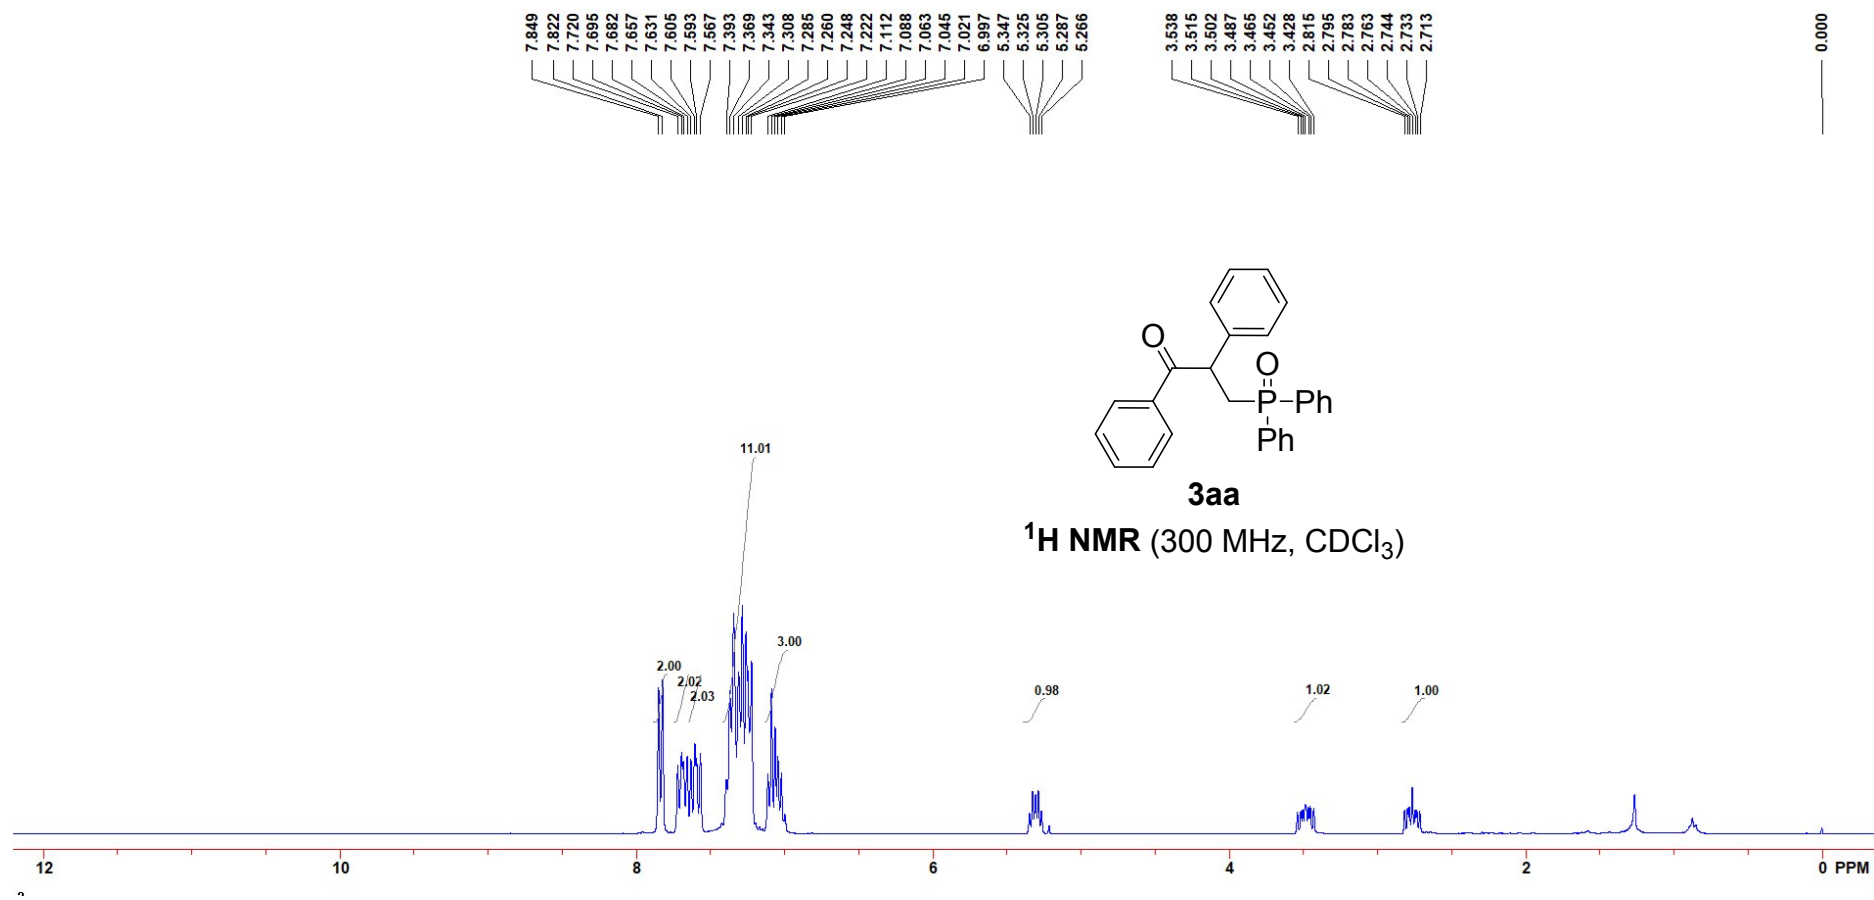

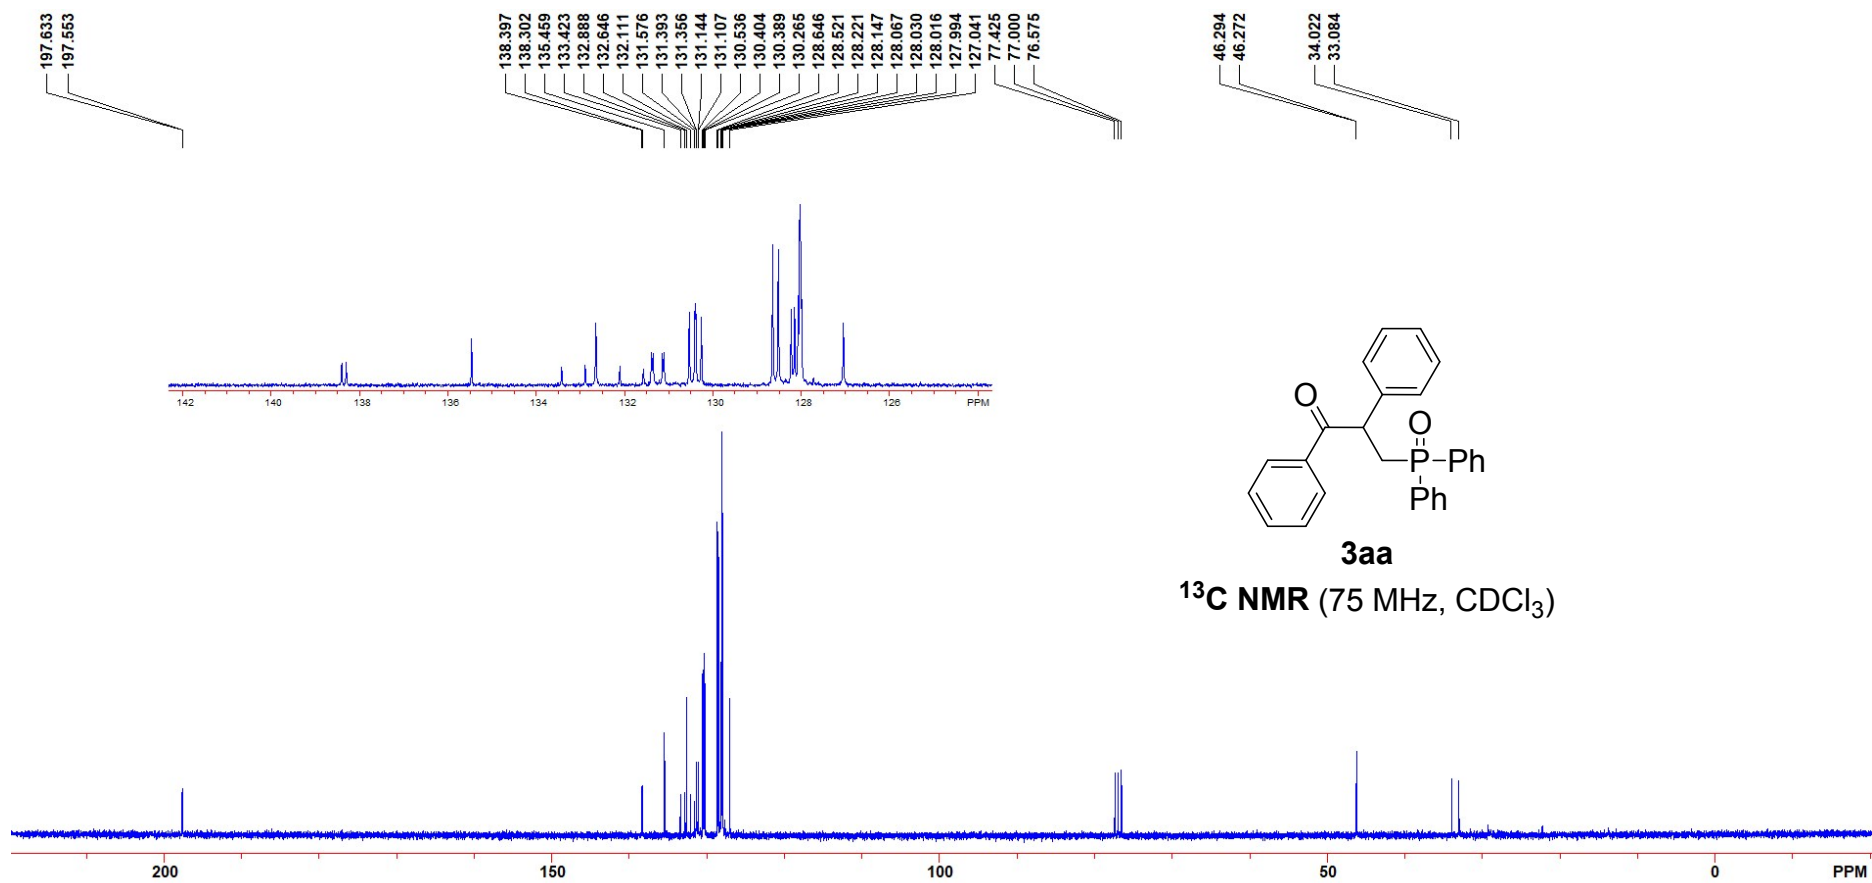

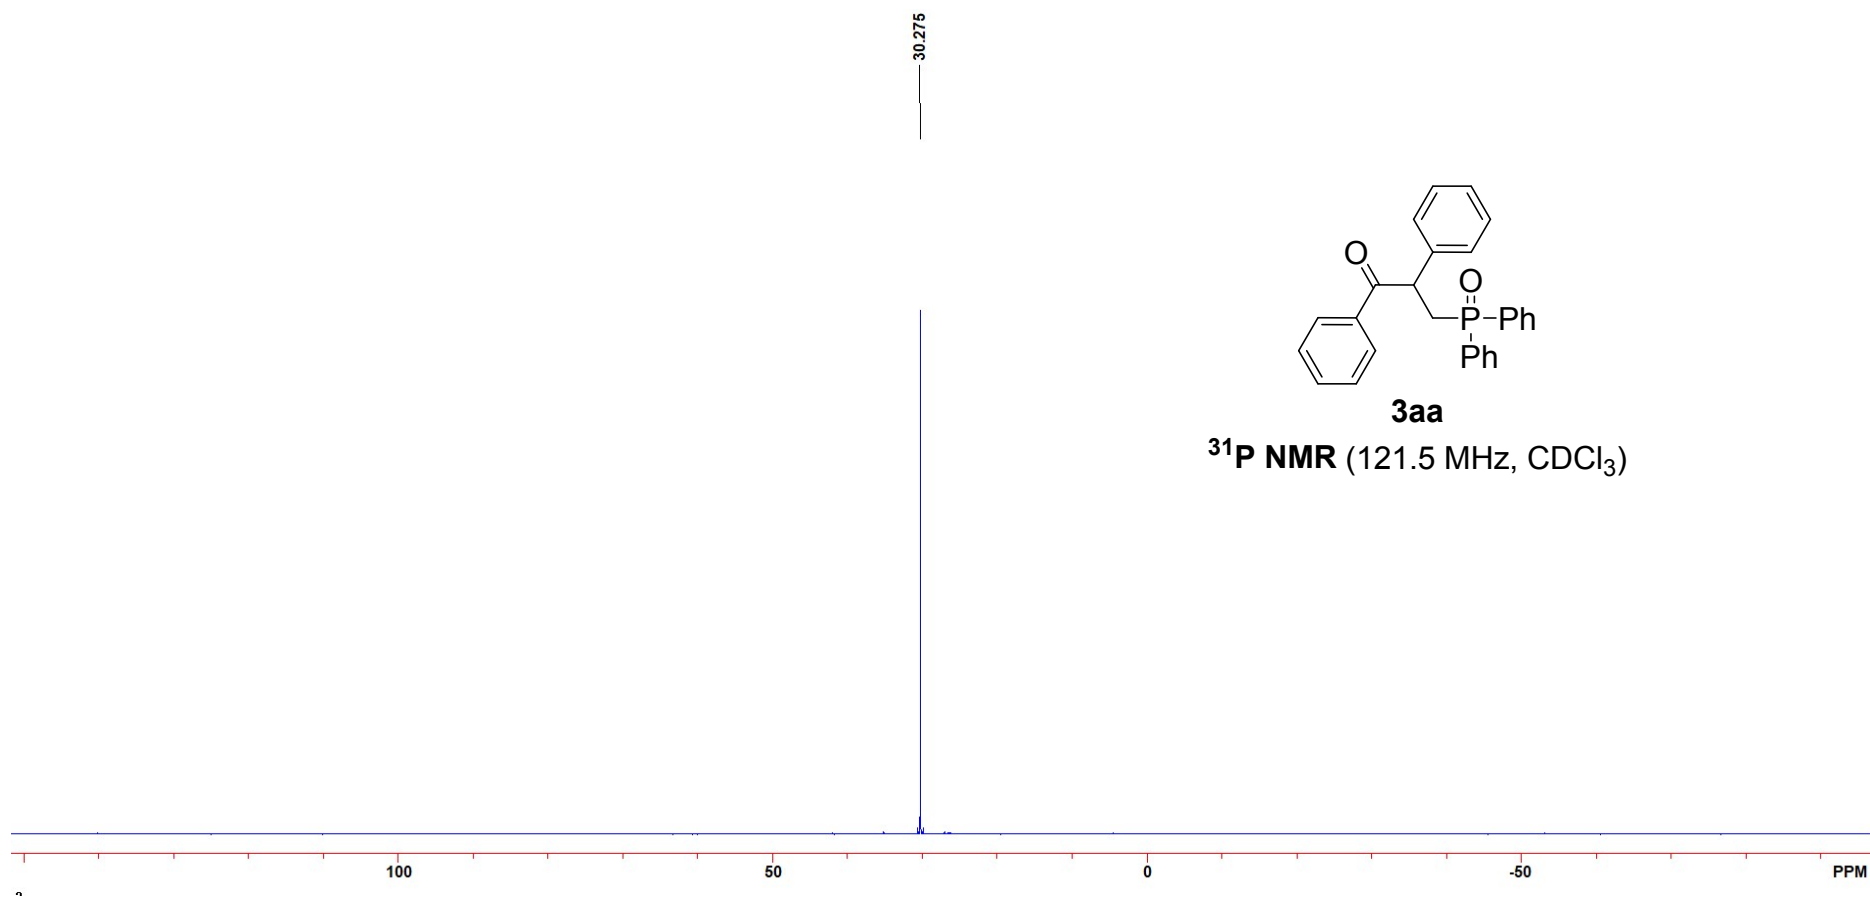



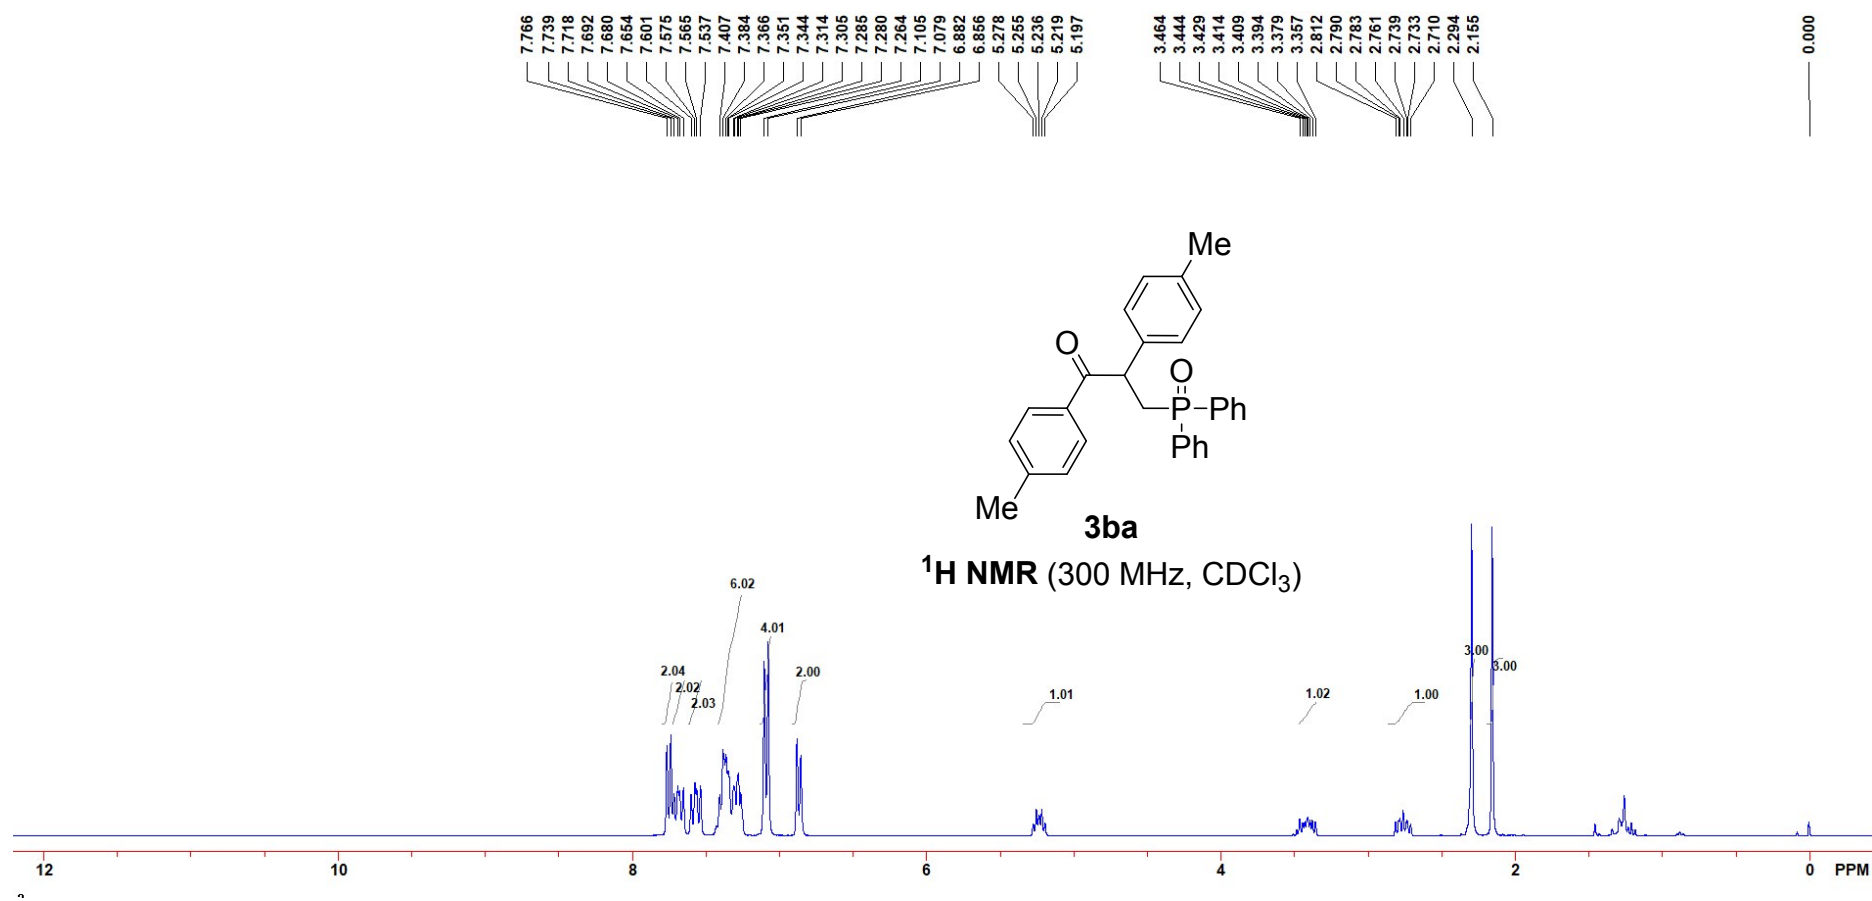

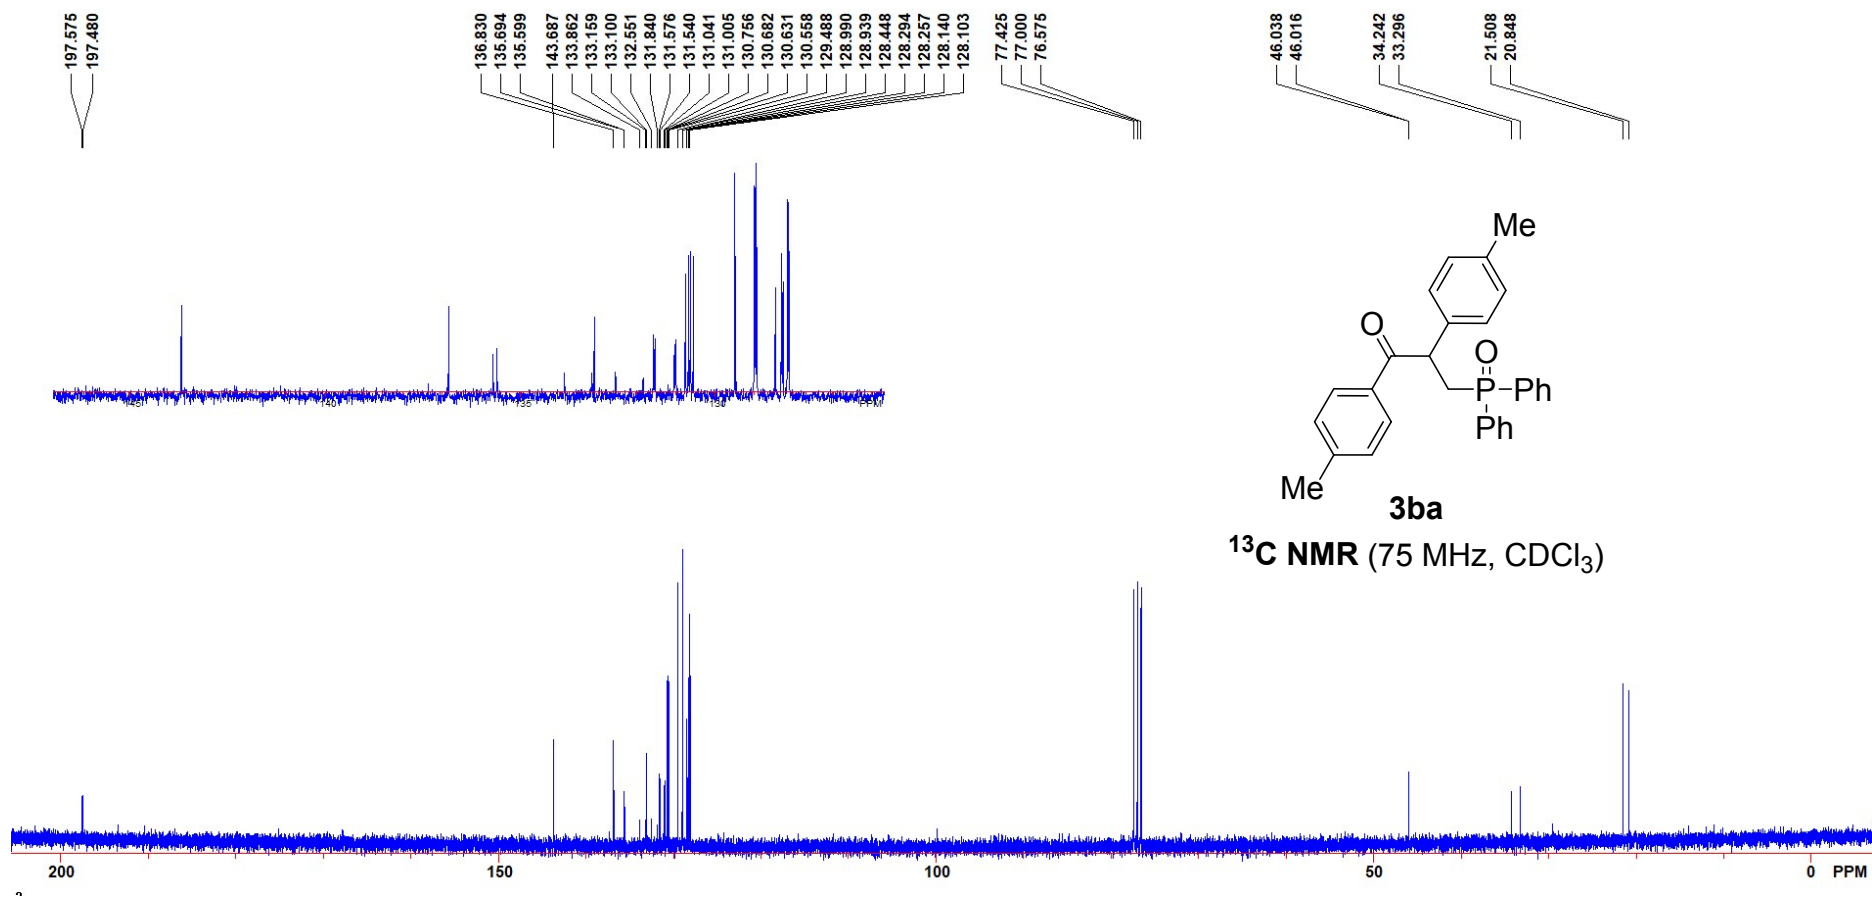

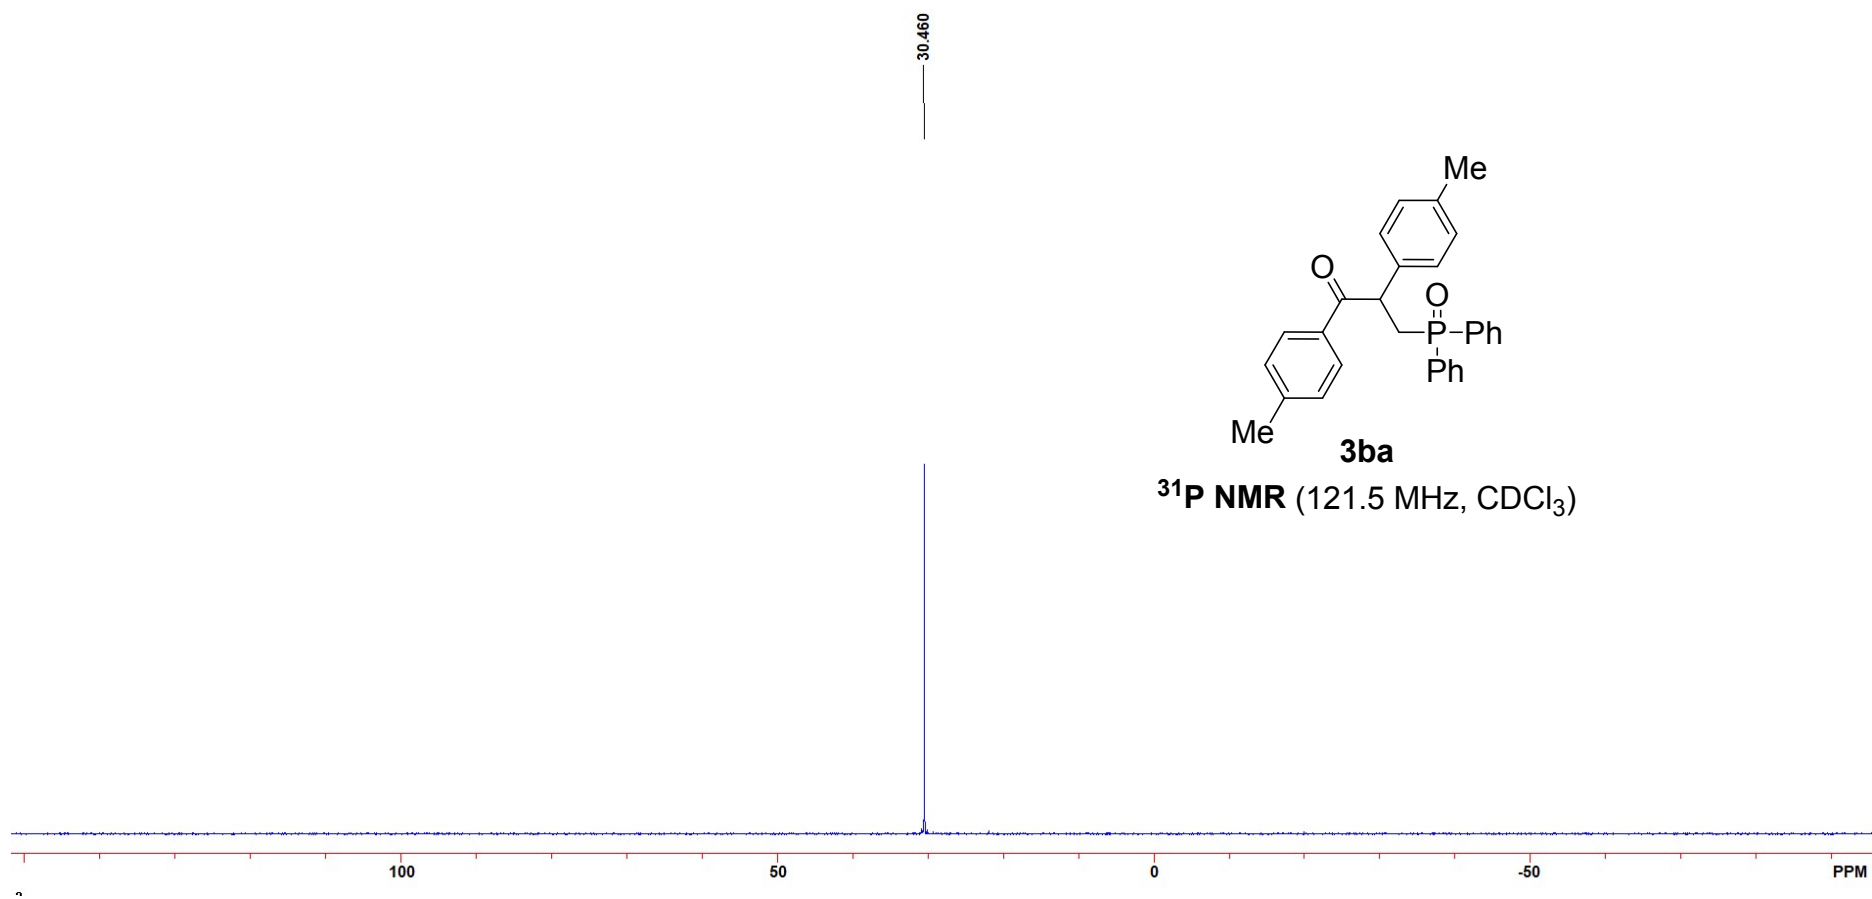

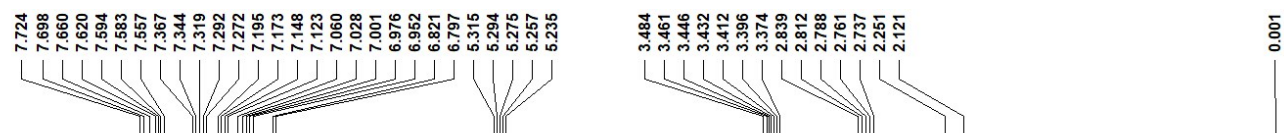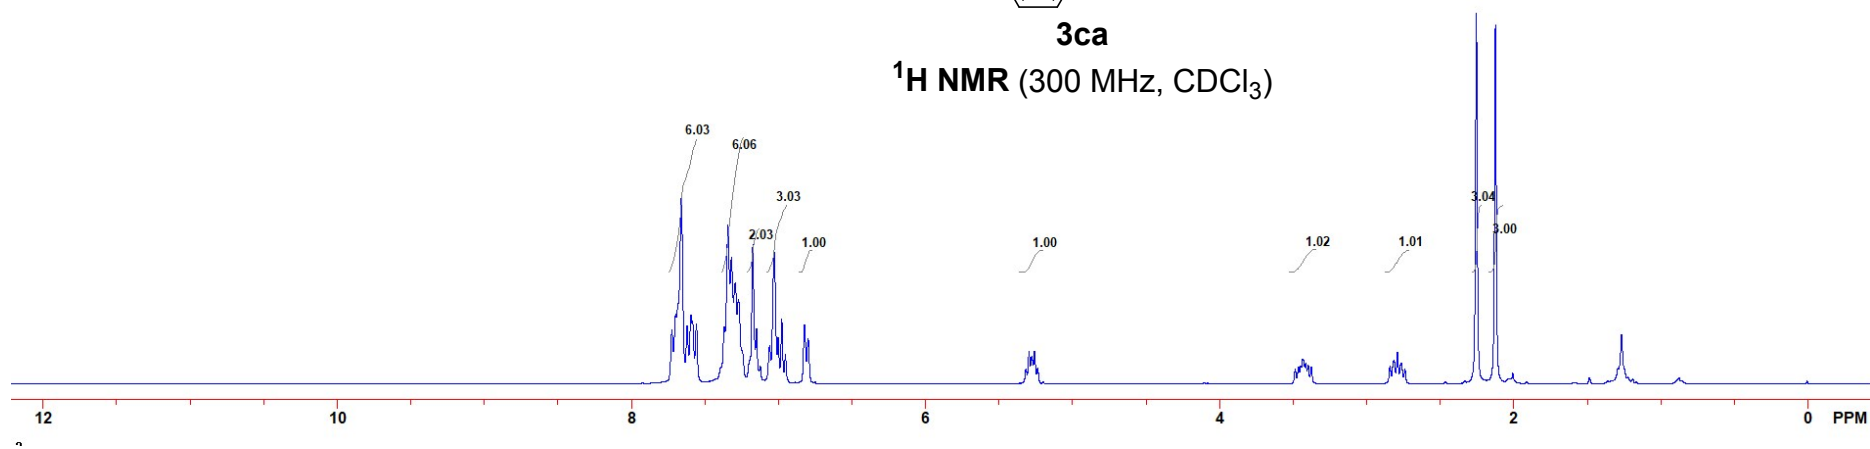

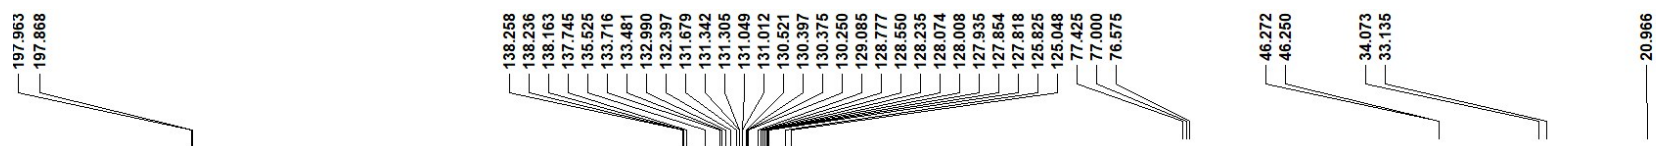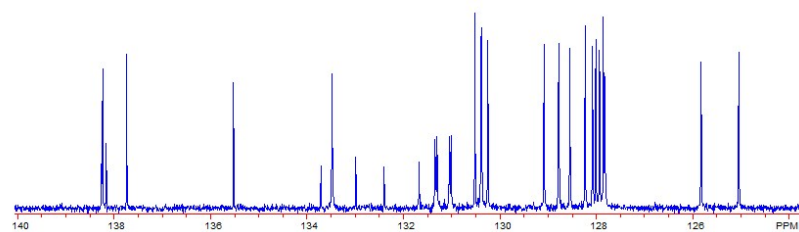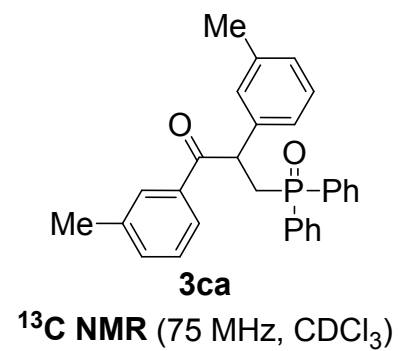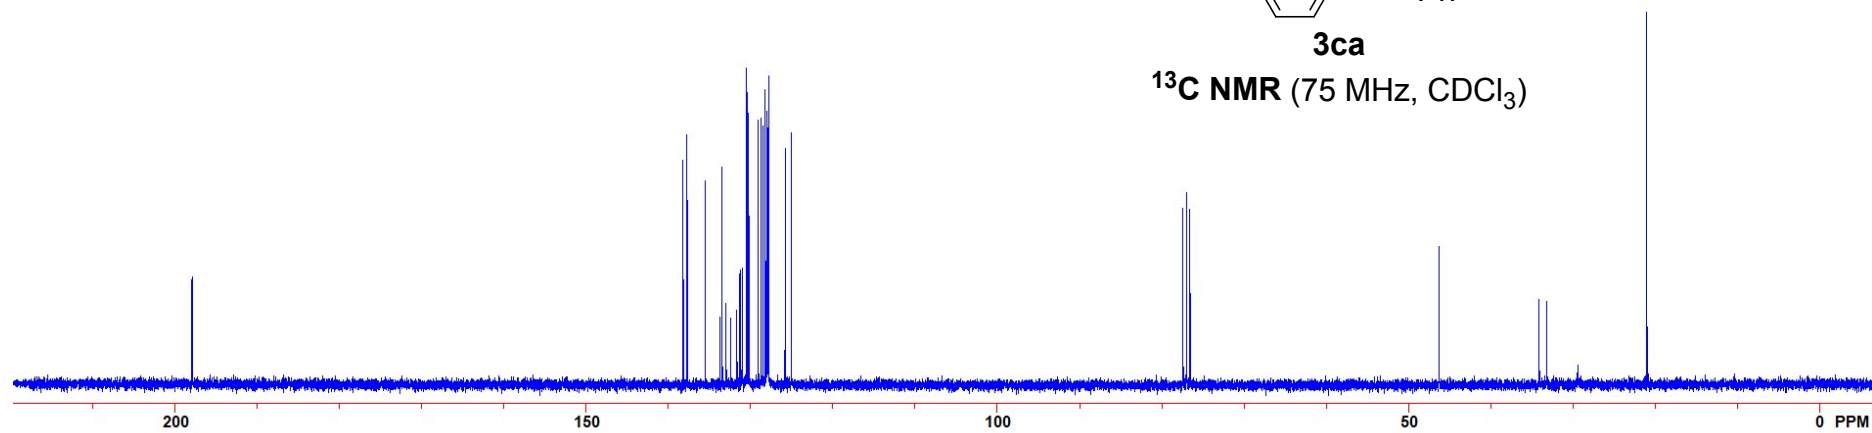

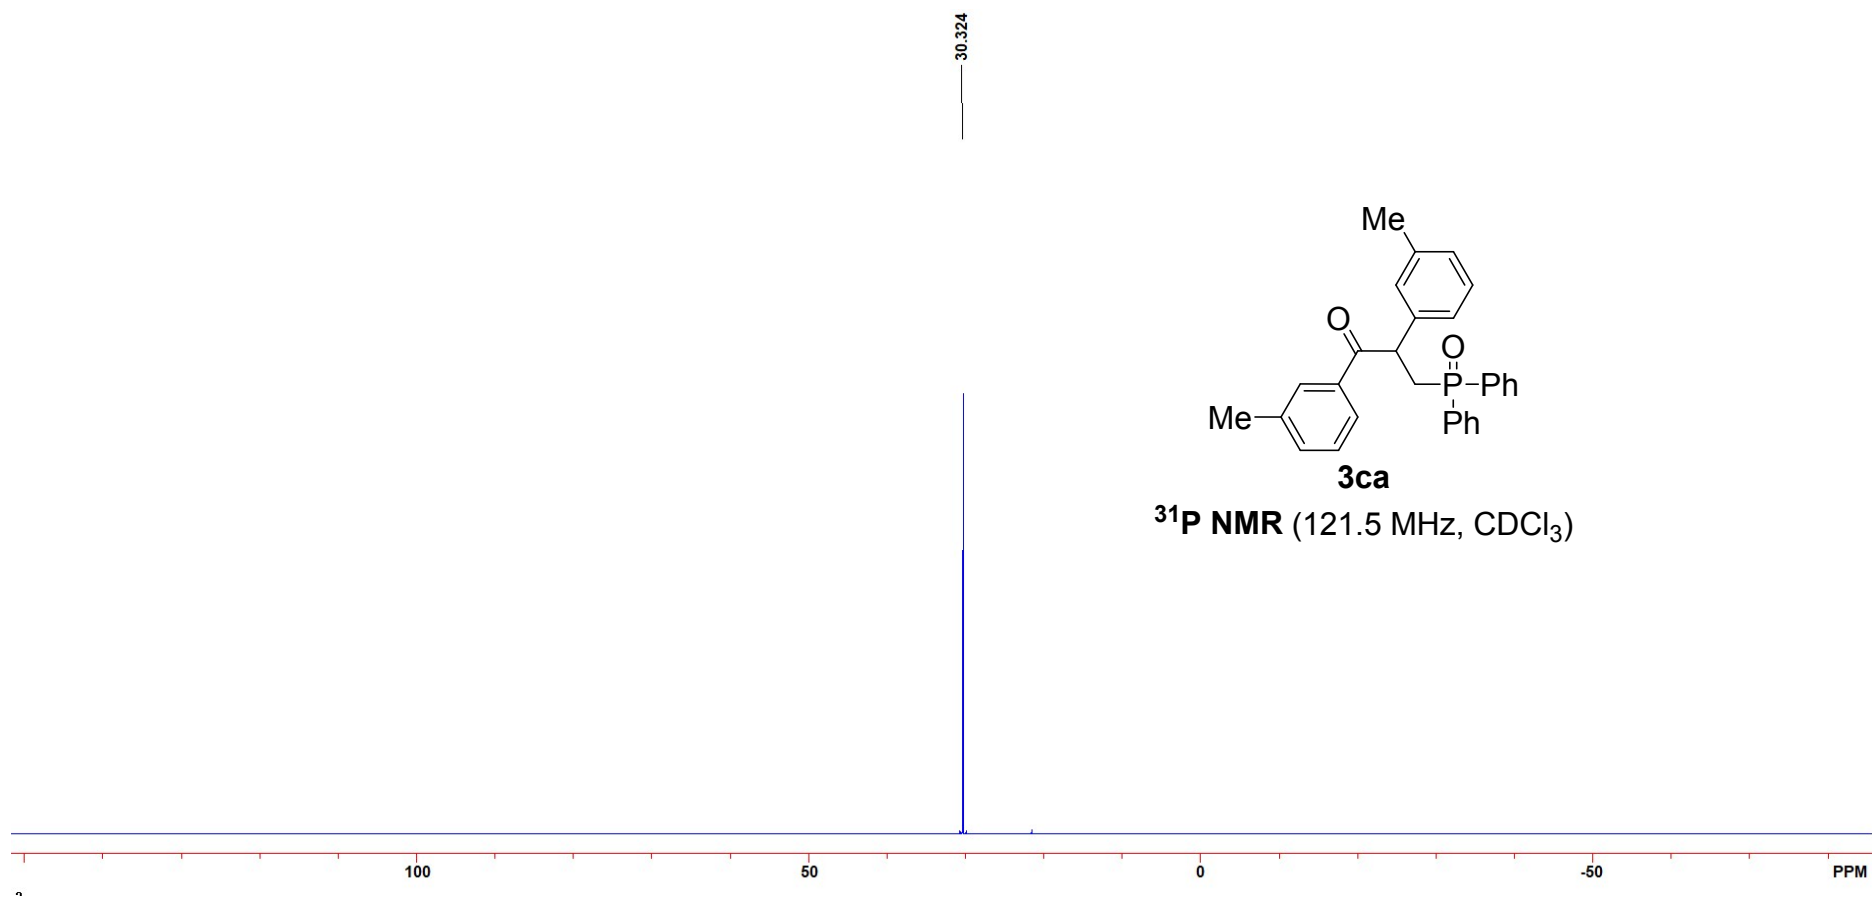

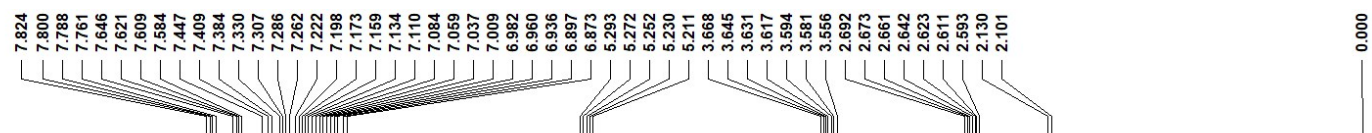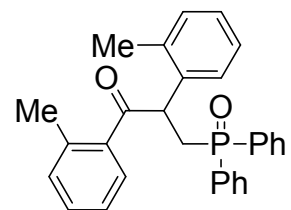

**3da**

$^1\text{H}$  NMR (300 MHz,  $\text{CDCl}_3$ )

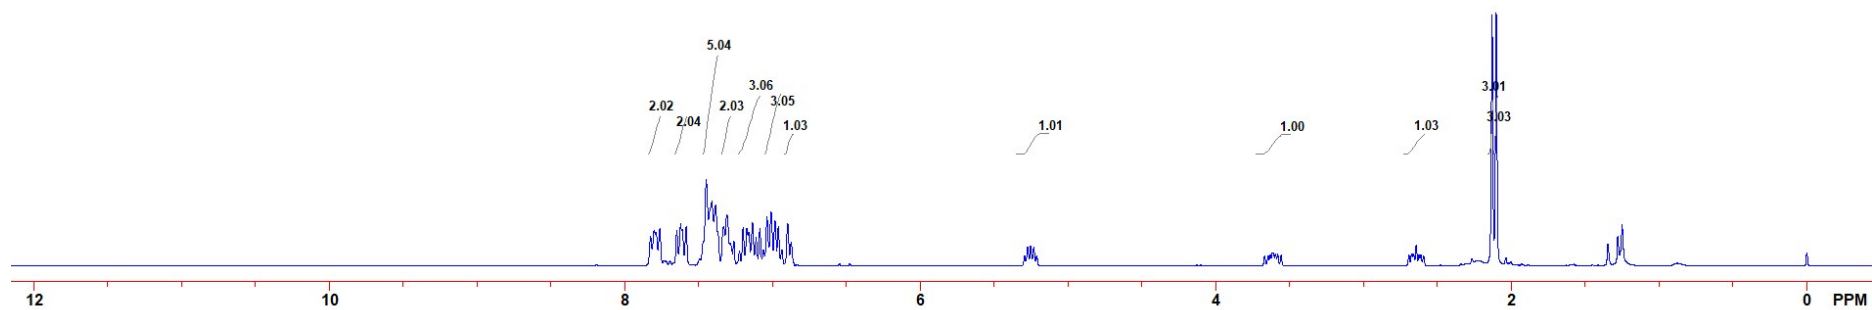

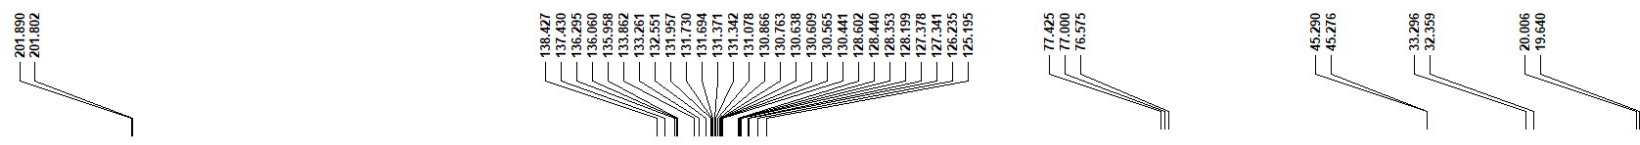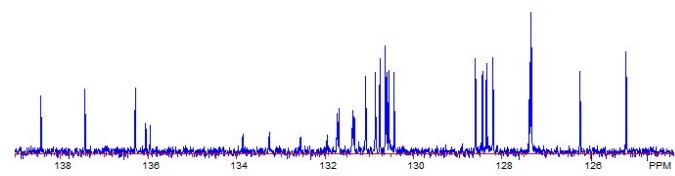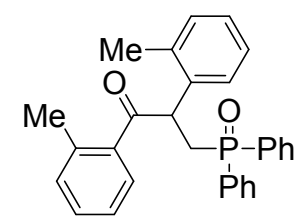

**3da**

**<sup>13</sup>C NMR (75 MHz, CDCl<sub>3</sub>)**

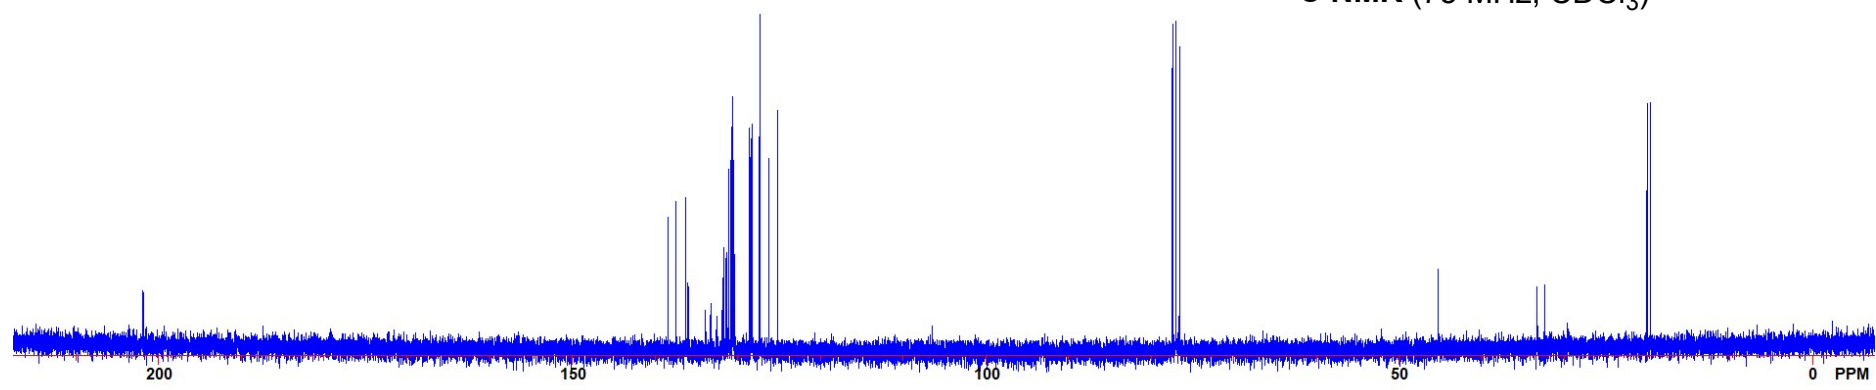



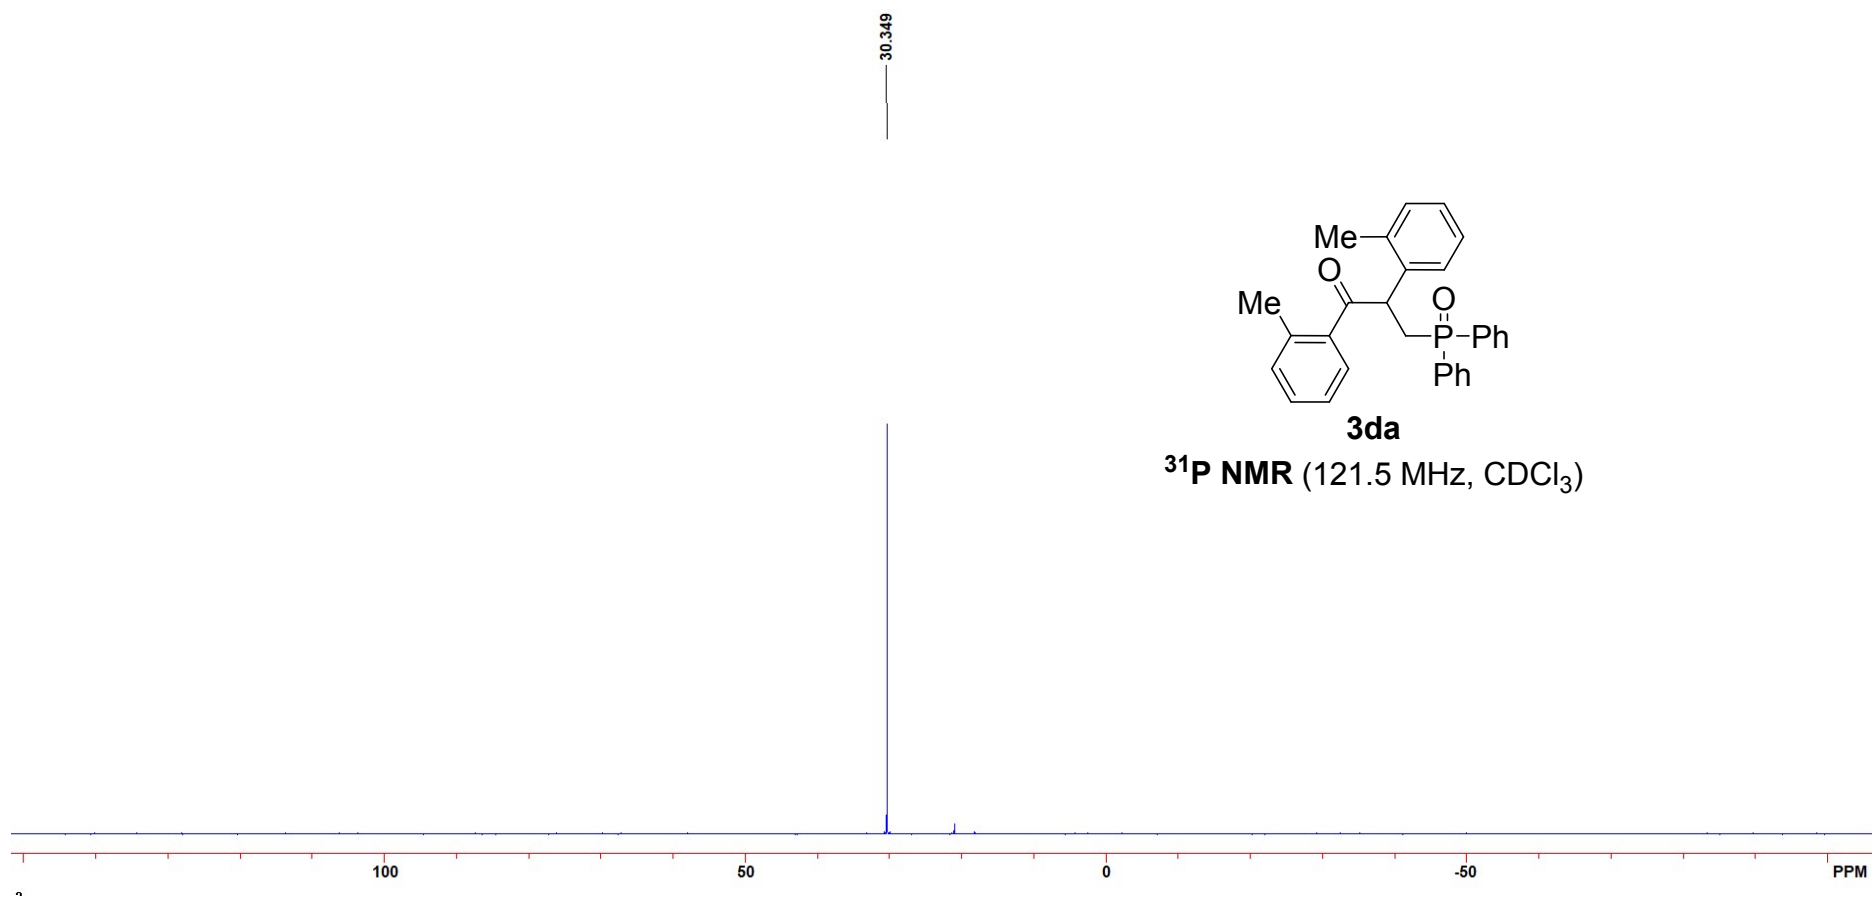

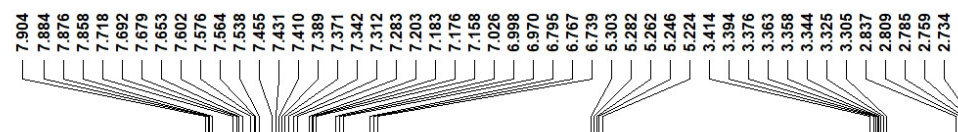

0.001

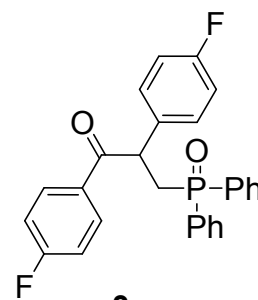

**3ea**

$^1\text{H}$  NMR (300 MHz,  $\text{CDCl}_3$ )

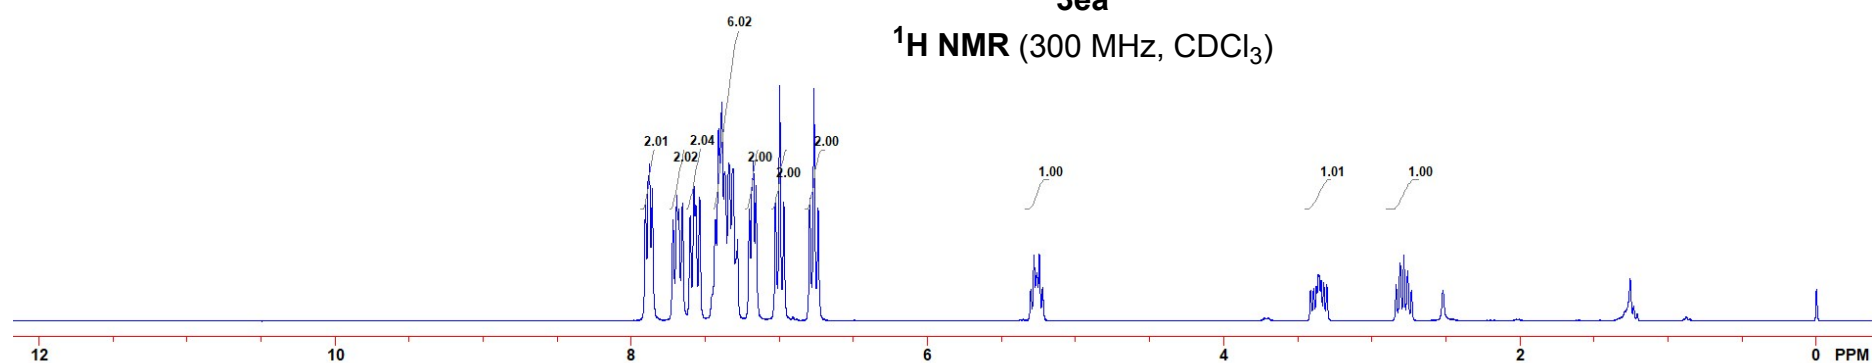

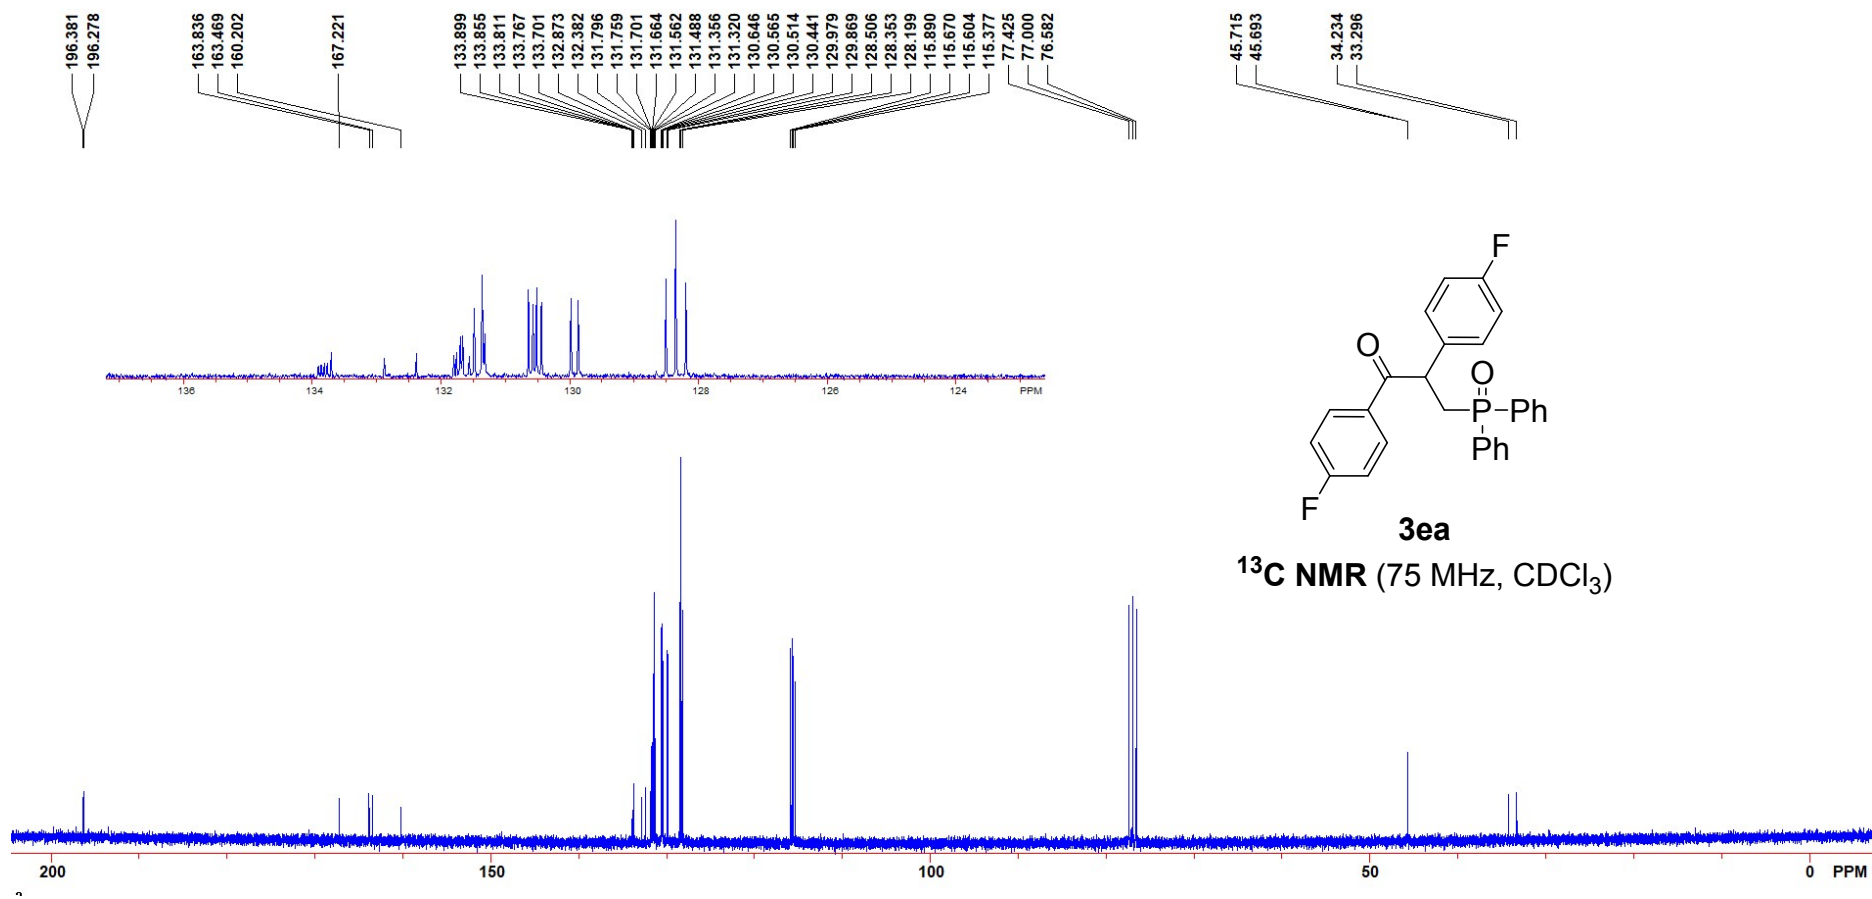



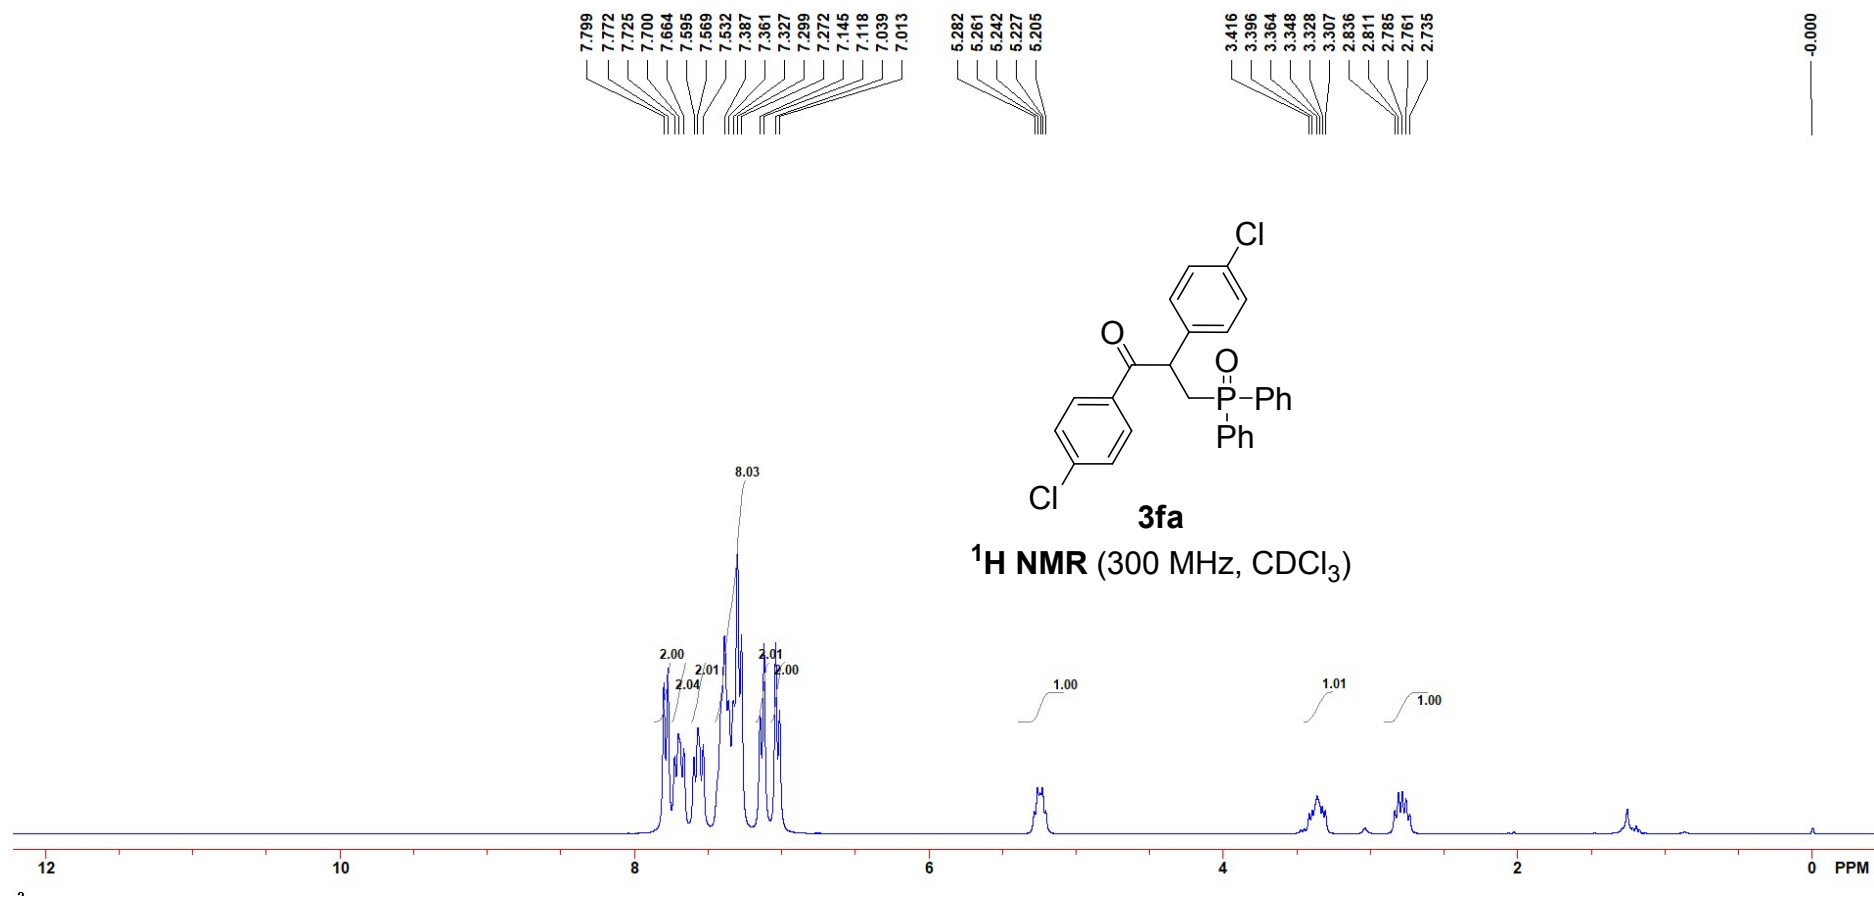

196.388  
196.285

136.324  
136.236  
133.547  
133.291  
132.631  
139.467  
132.236  
131.642  
131.606  
131.313  
131.210  
131.166  
130.514  
130.470  
130.389  
130.345  
130.030  
129.554  
128.895  
128.624  
128.440  
128.279  
128.125

77.425  
77.000  
76.582

45.898  
45.876  
33.992  
33.055

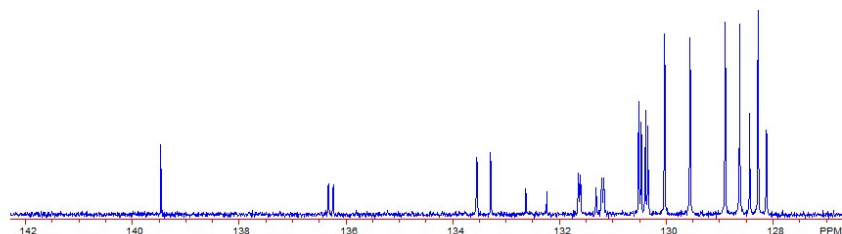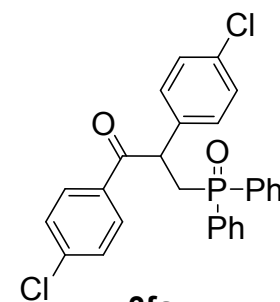

<sup>13</sup>C NMR (75 MHz, CDCl<sub>3</sub>)

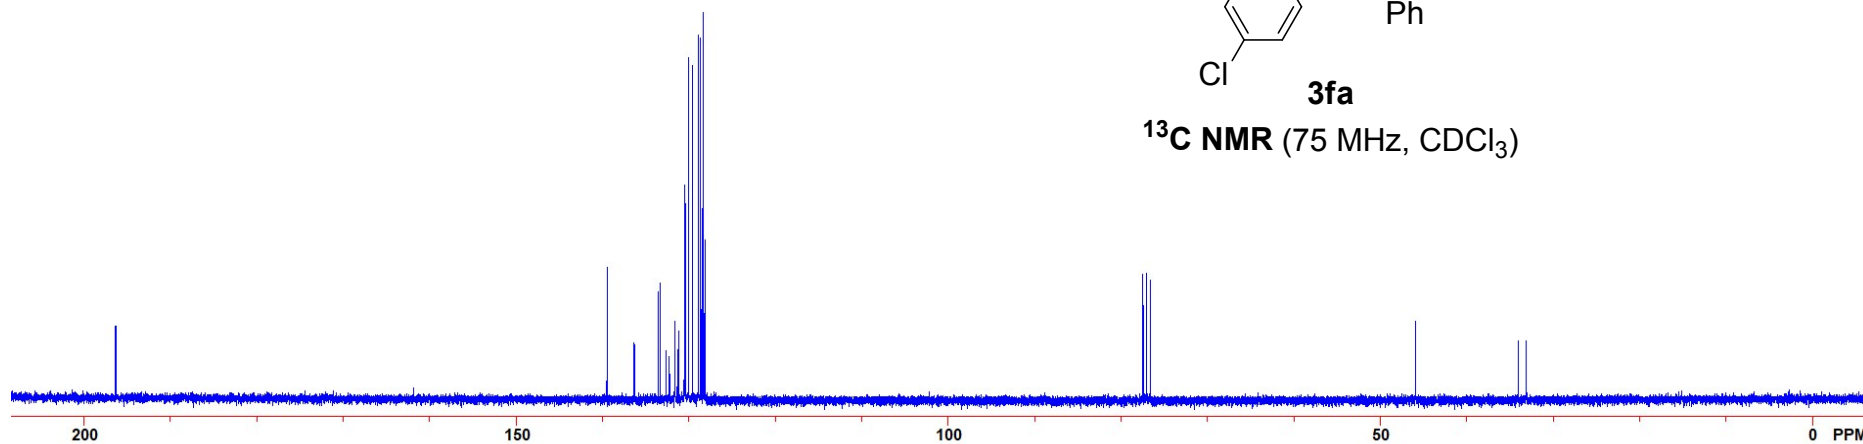

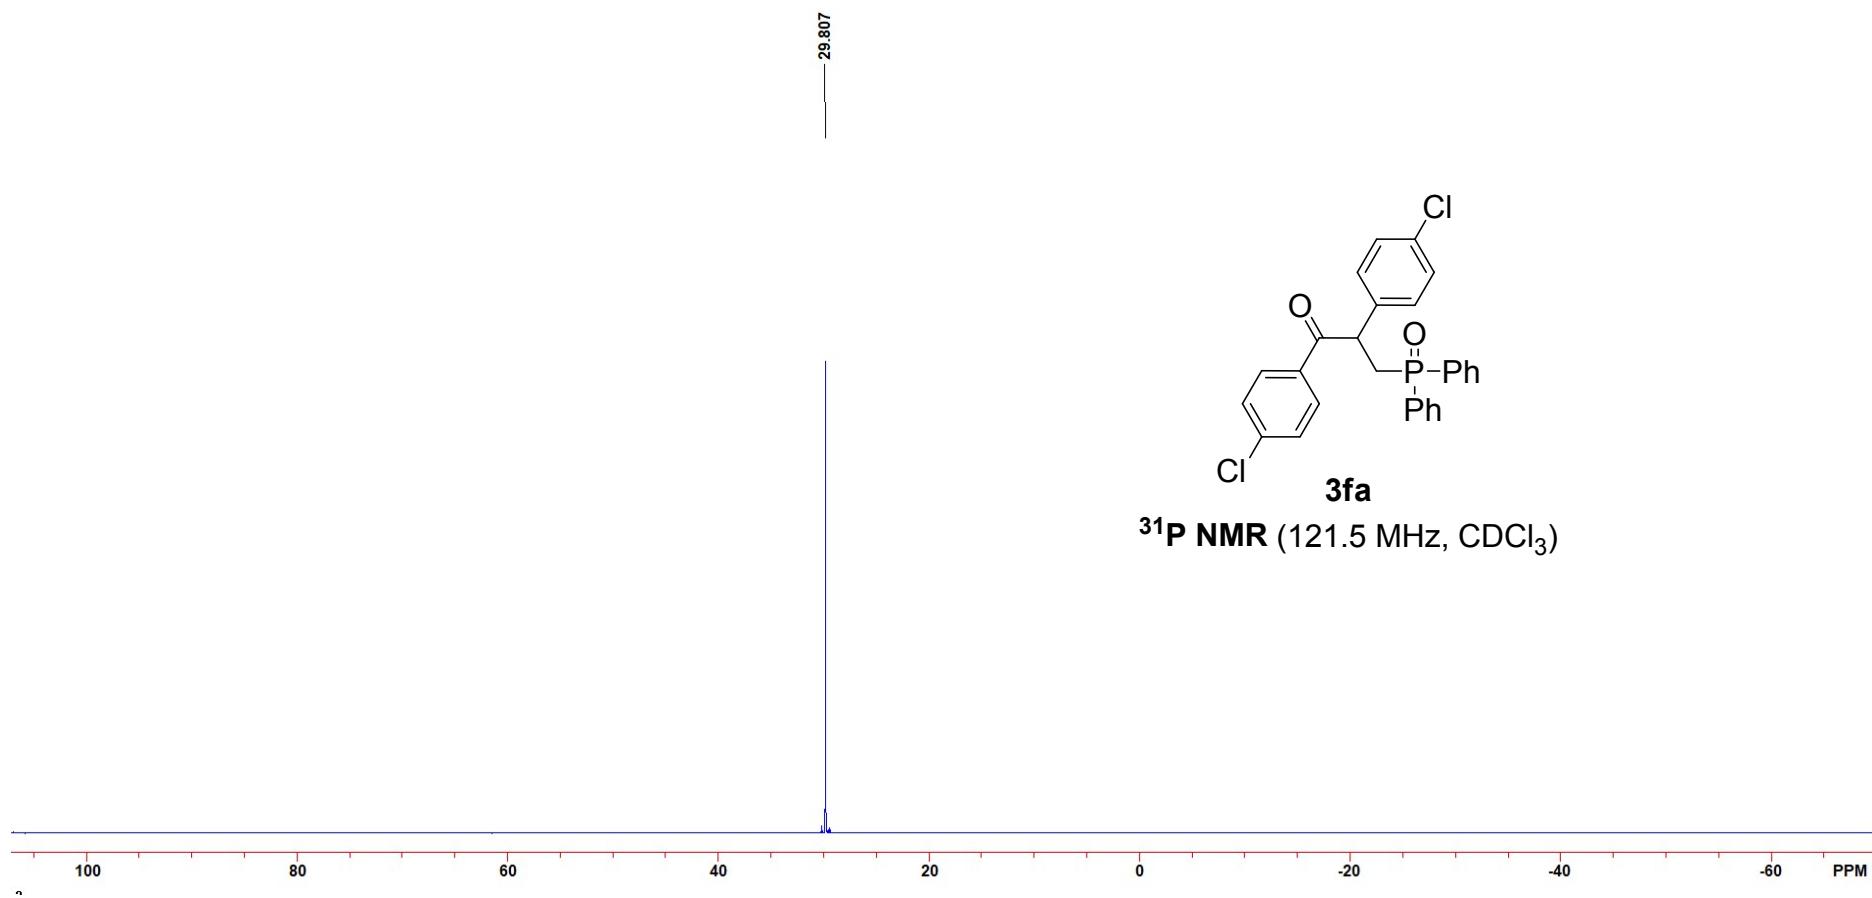

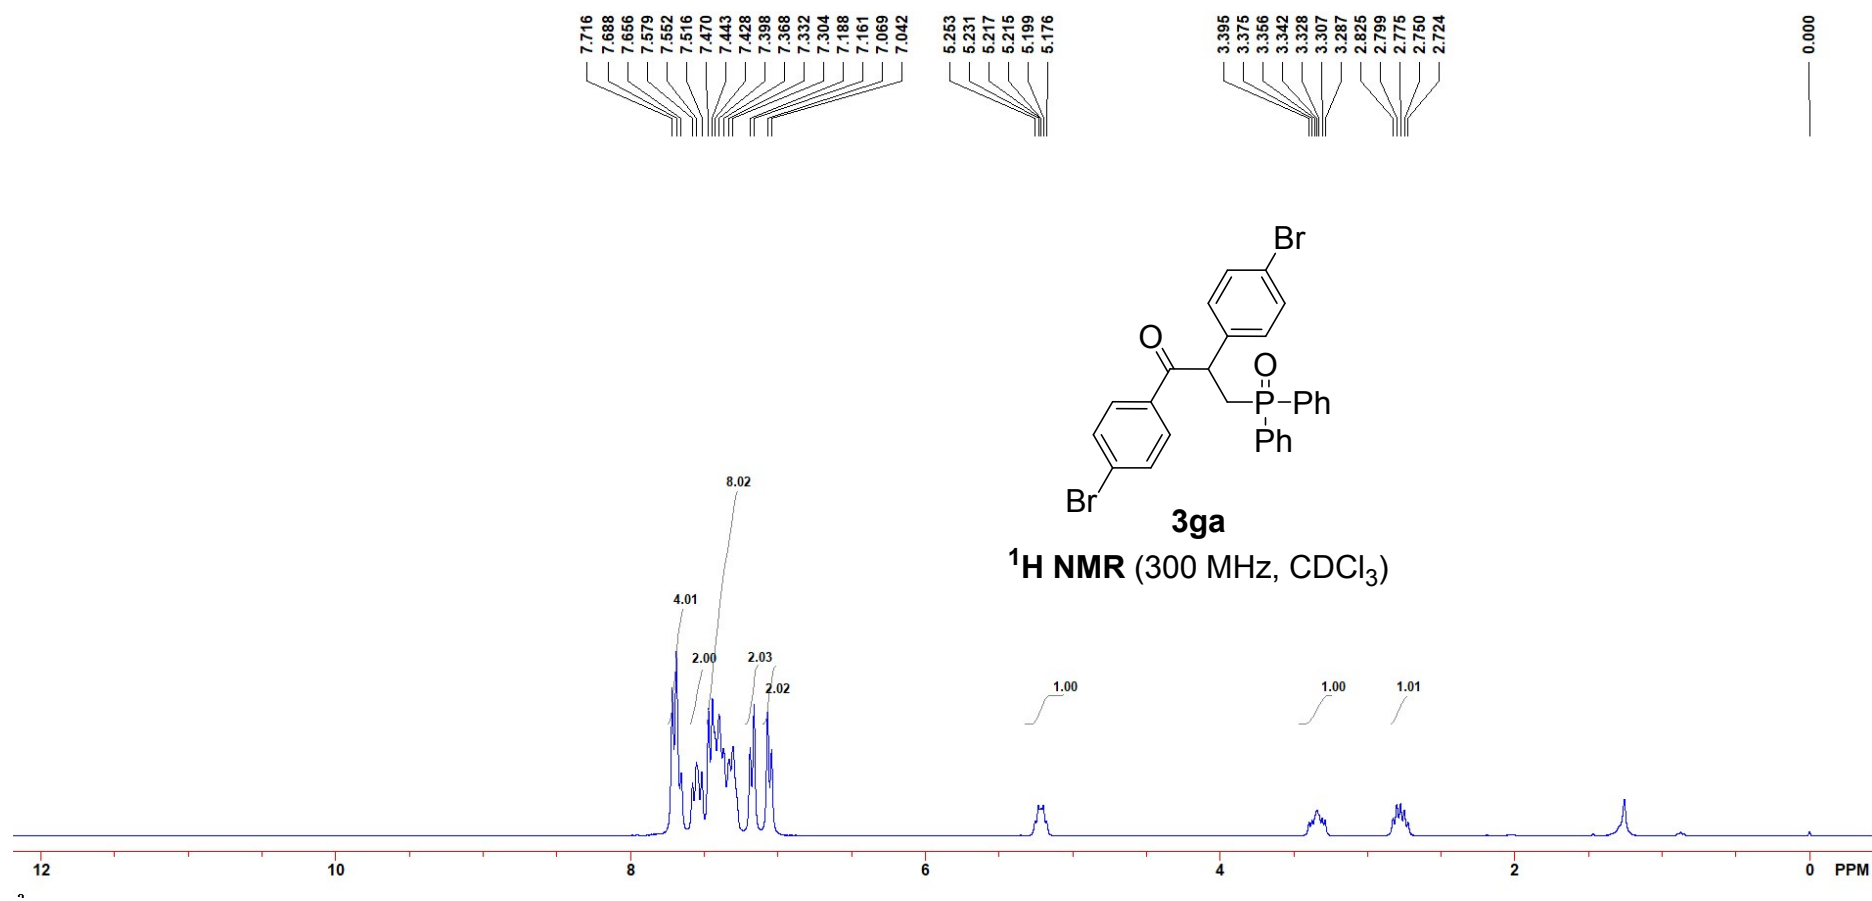



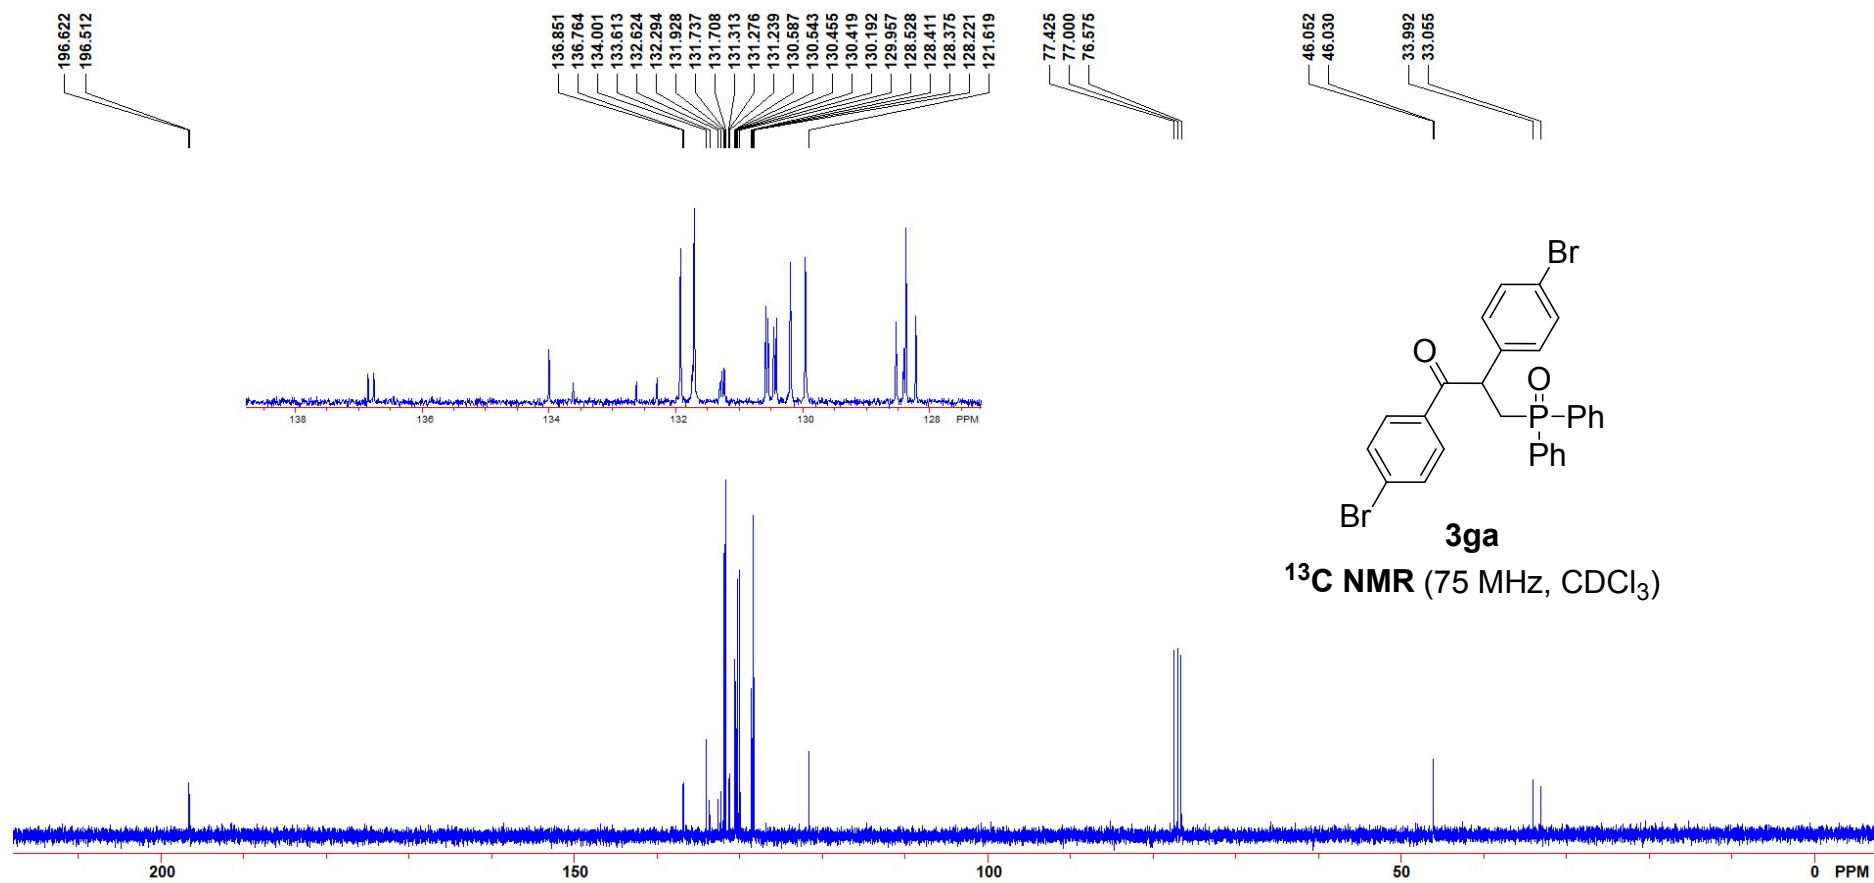

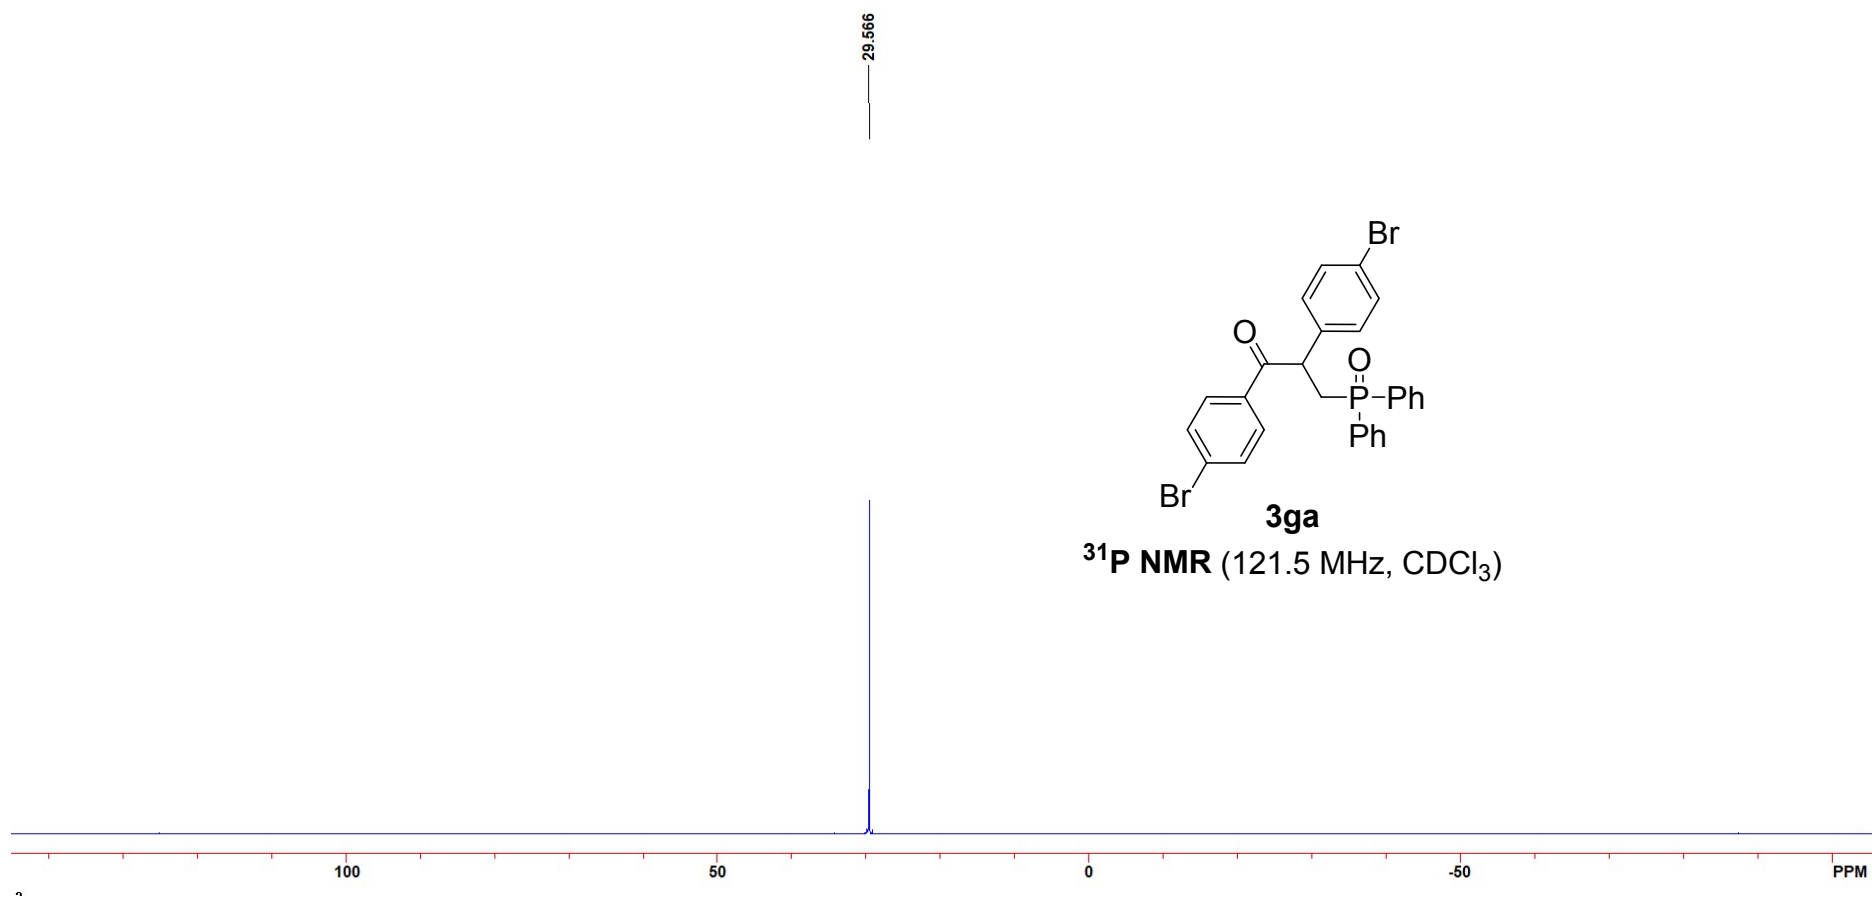

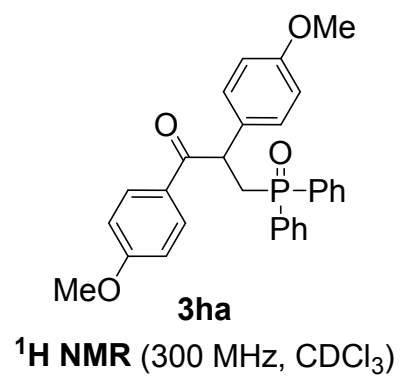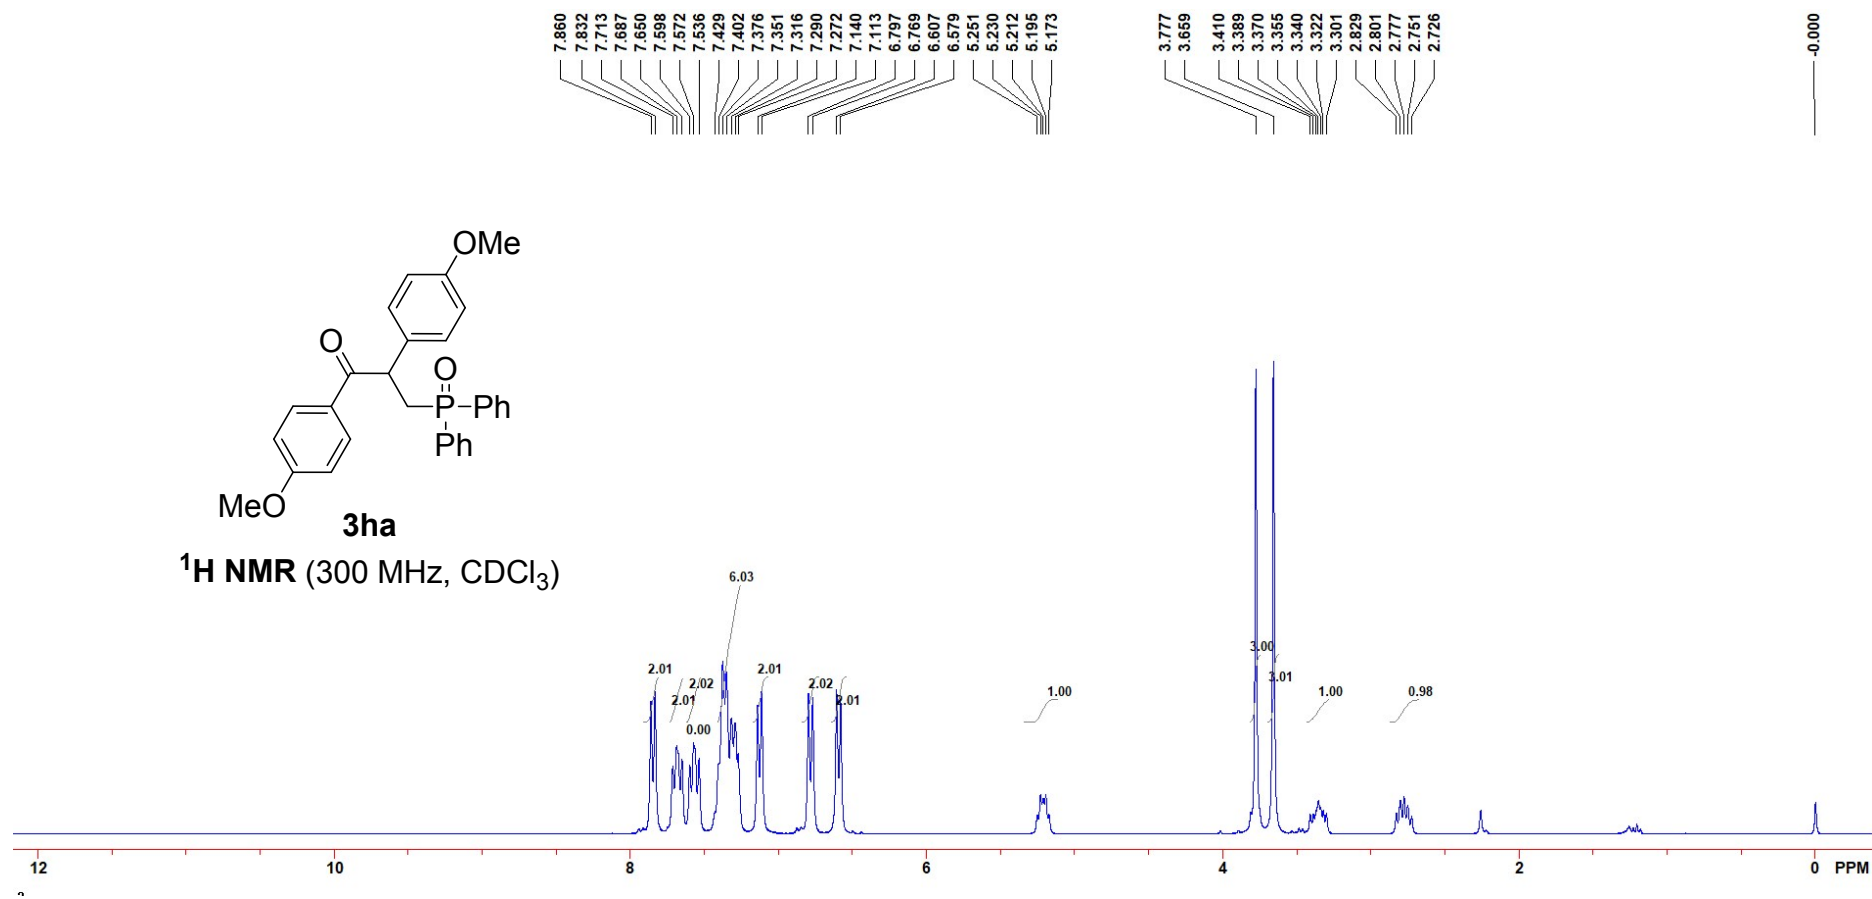

196.534  
196.439

163.205  
158.509

133.928  
133.174  
132.617  
131.862  
131.532  
131.503  
131.100  
131.056  
130.770  
130.682  
130.531  
130.558  
130.507  
129.327  
128.521  
128.411  
128.257  
128.235  
128.081  
114.139  
113.450

77.425  
77.000  
76.575

55.269  
55.020

45.305  
45.283

34.220  
33.274

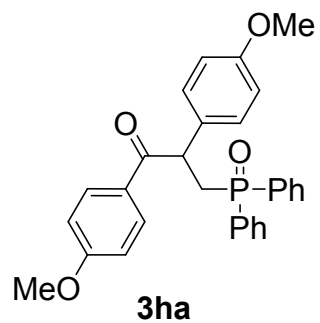

**<sup>13</sup>C NMR (75 MHz, CDCl<sub>3</sub>)**

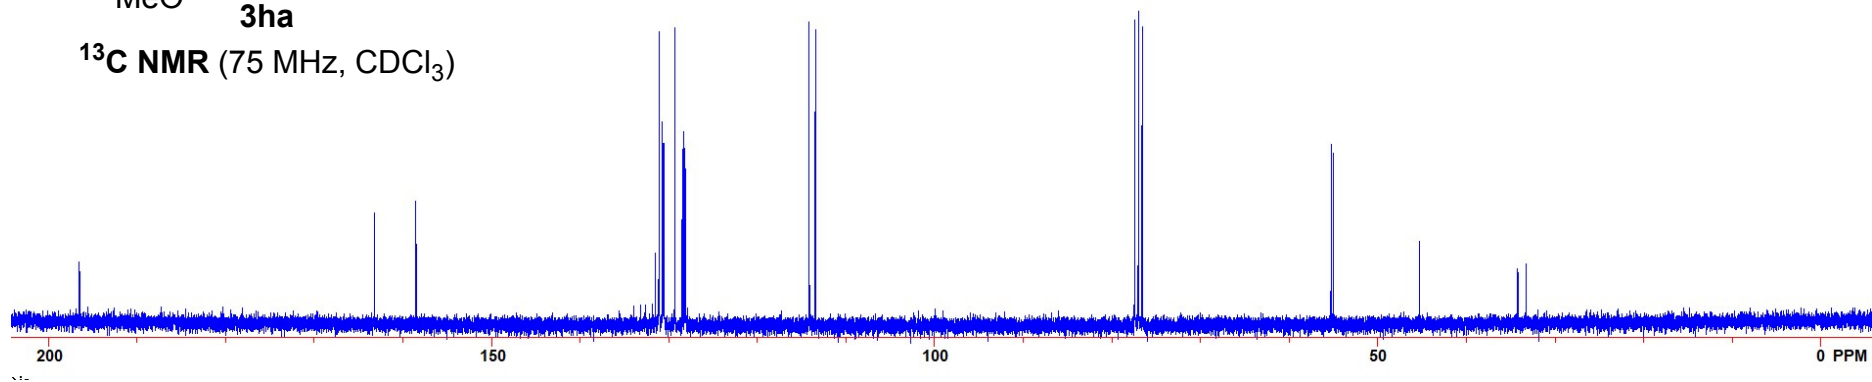

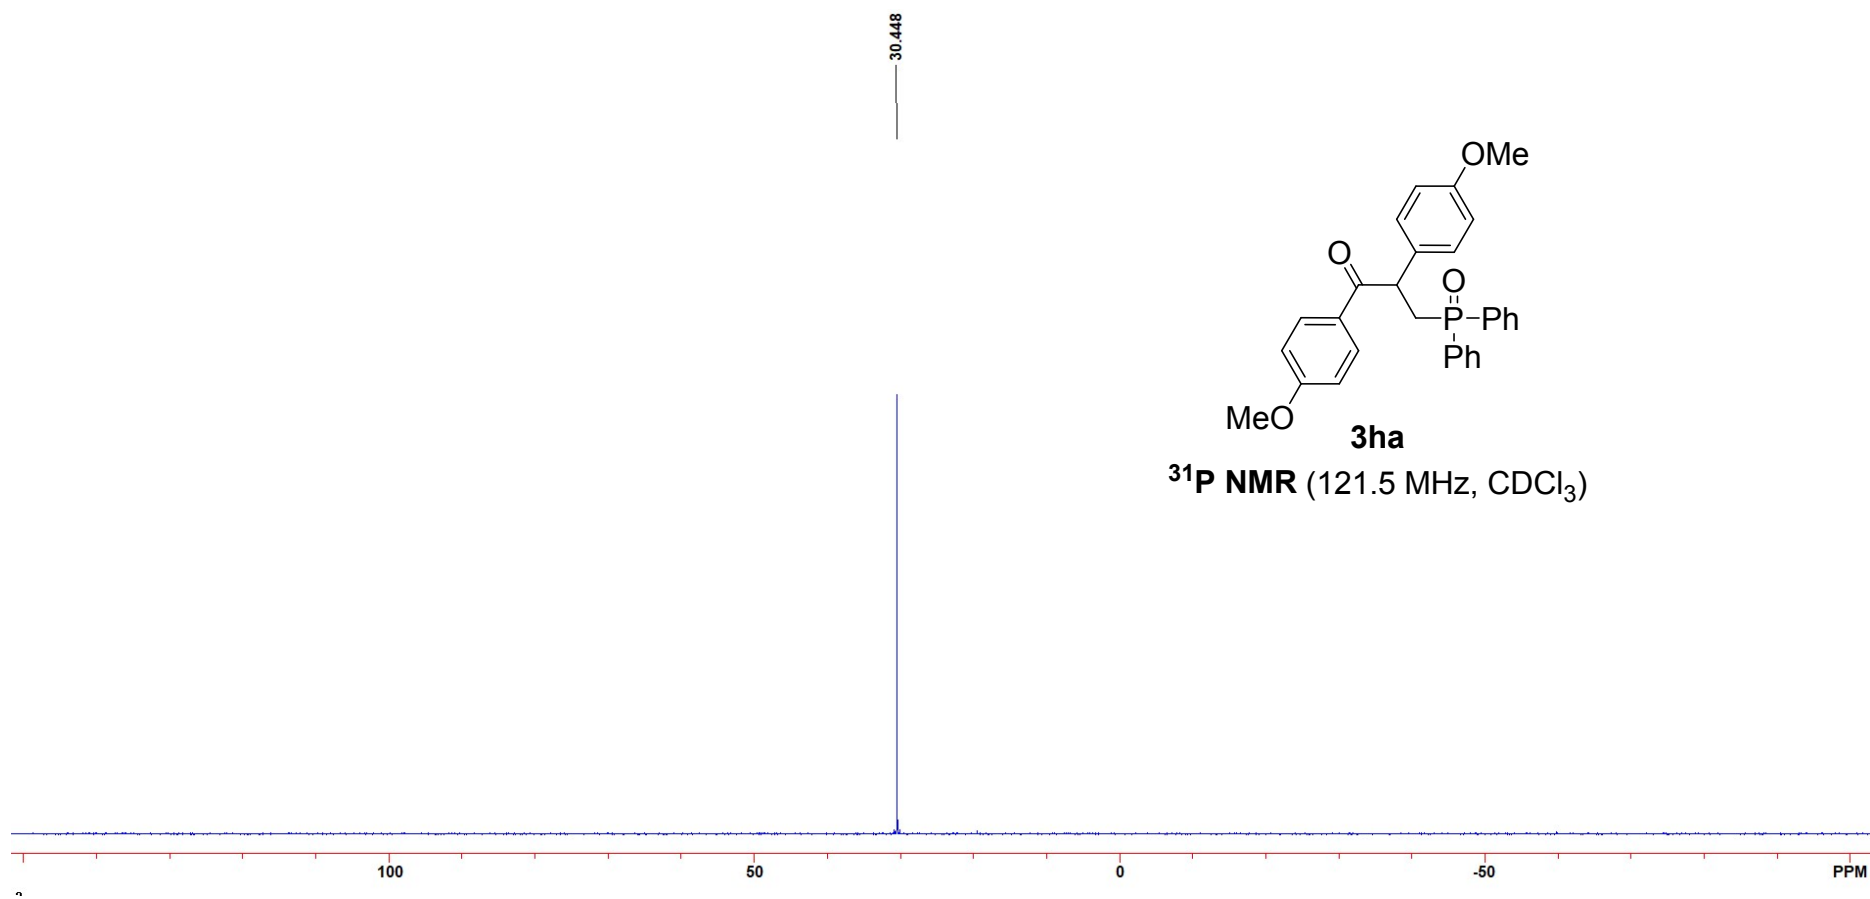

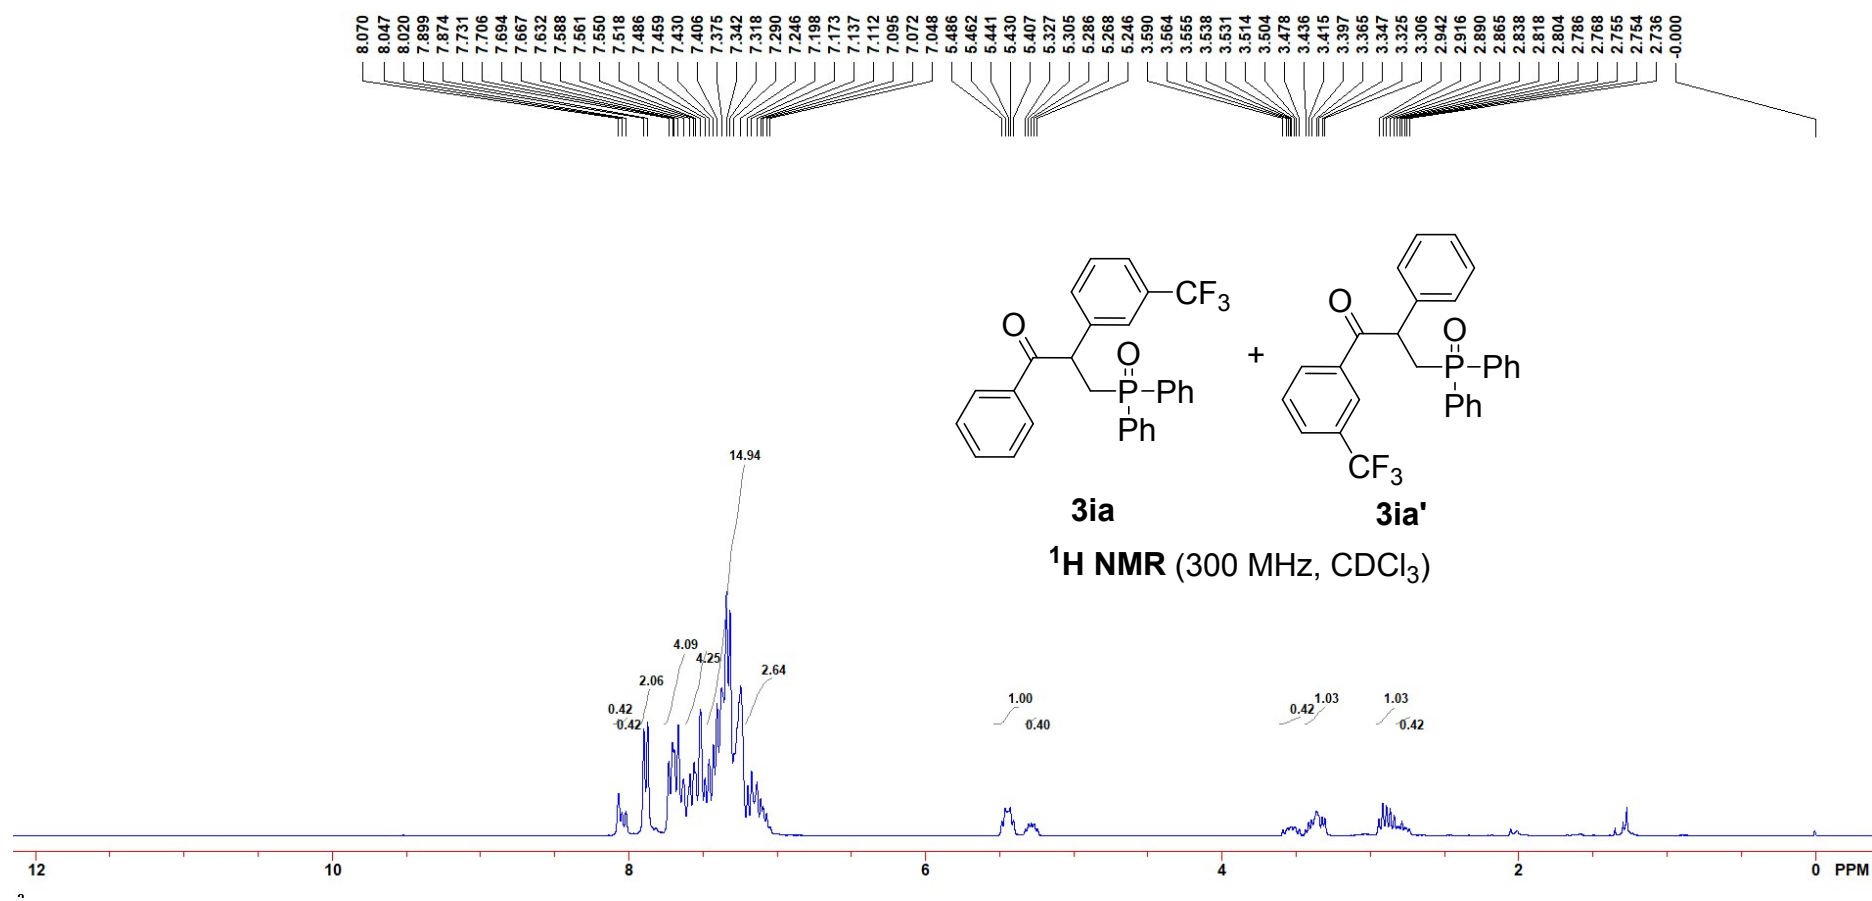

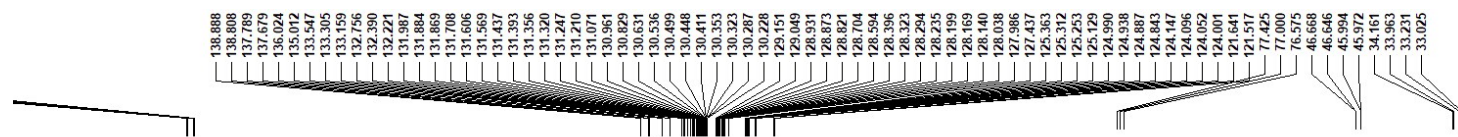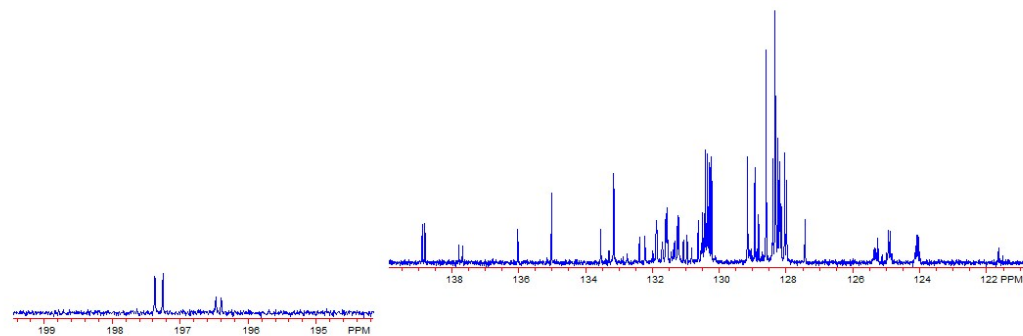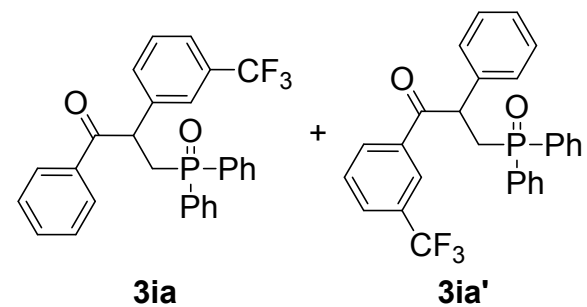

<sup>13</sup>C NMR (75 MHz, CDCl<sub>3</sub>)

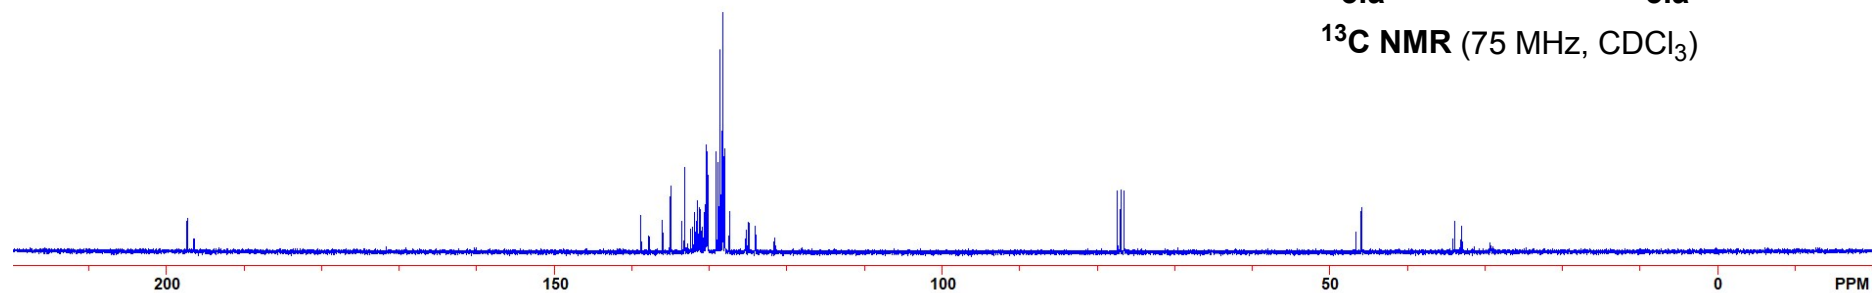

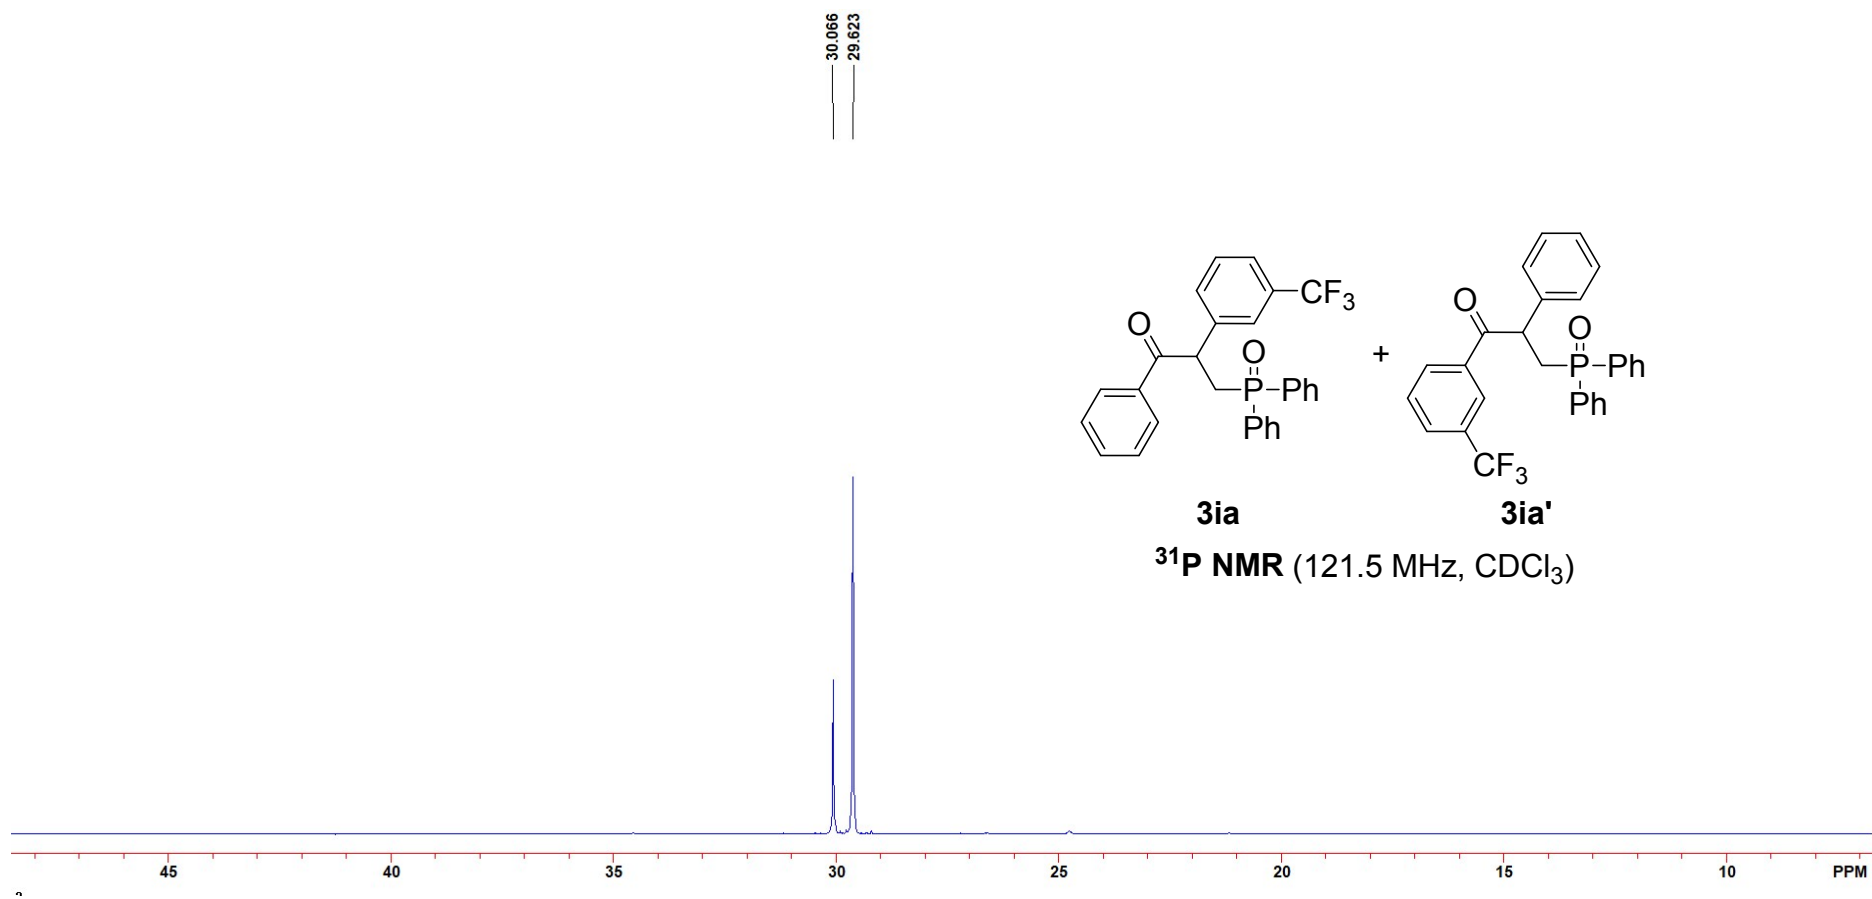



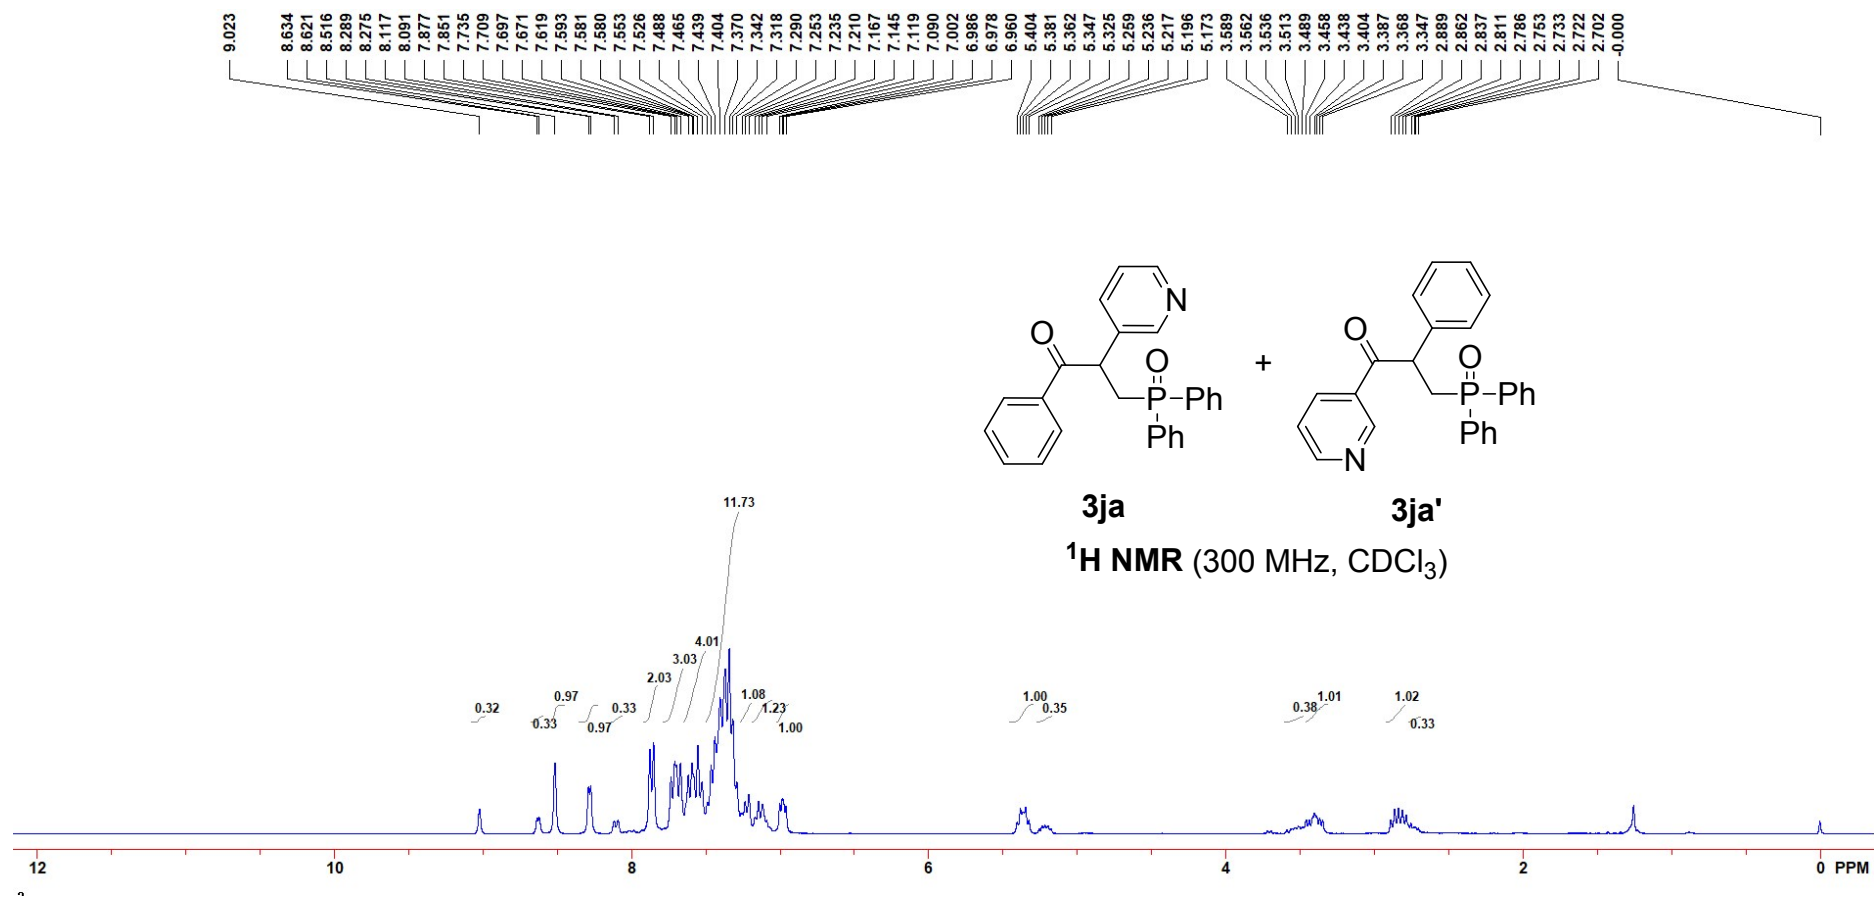

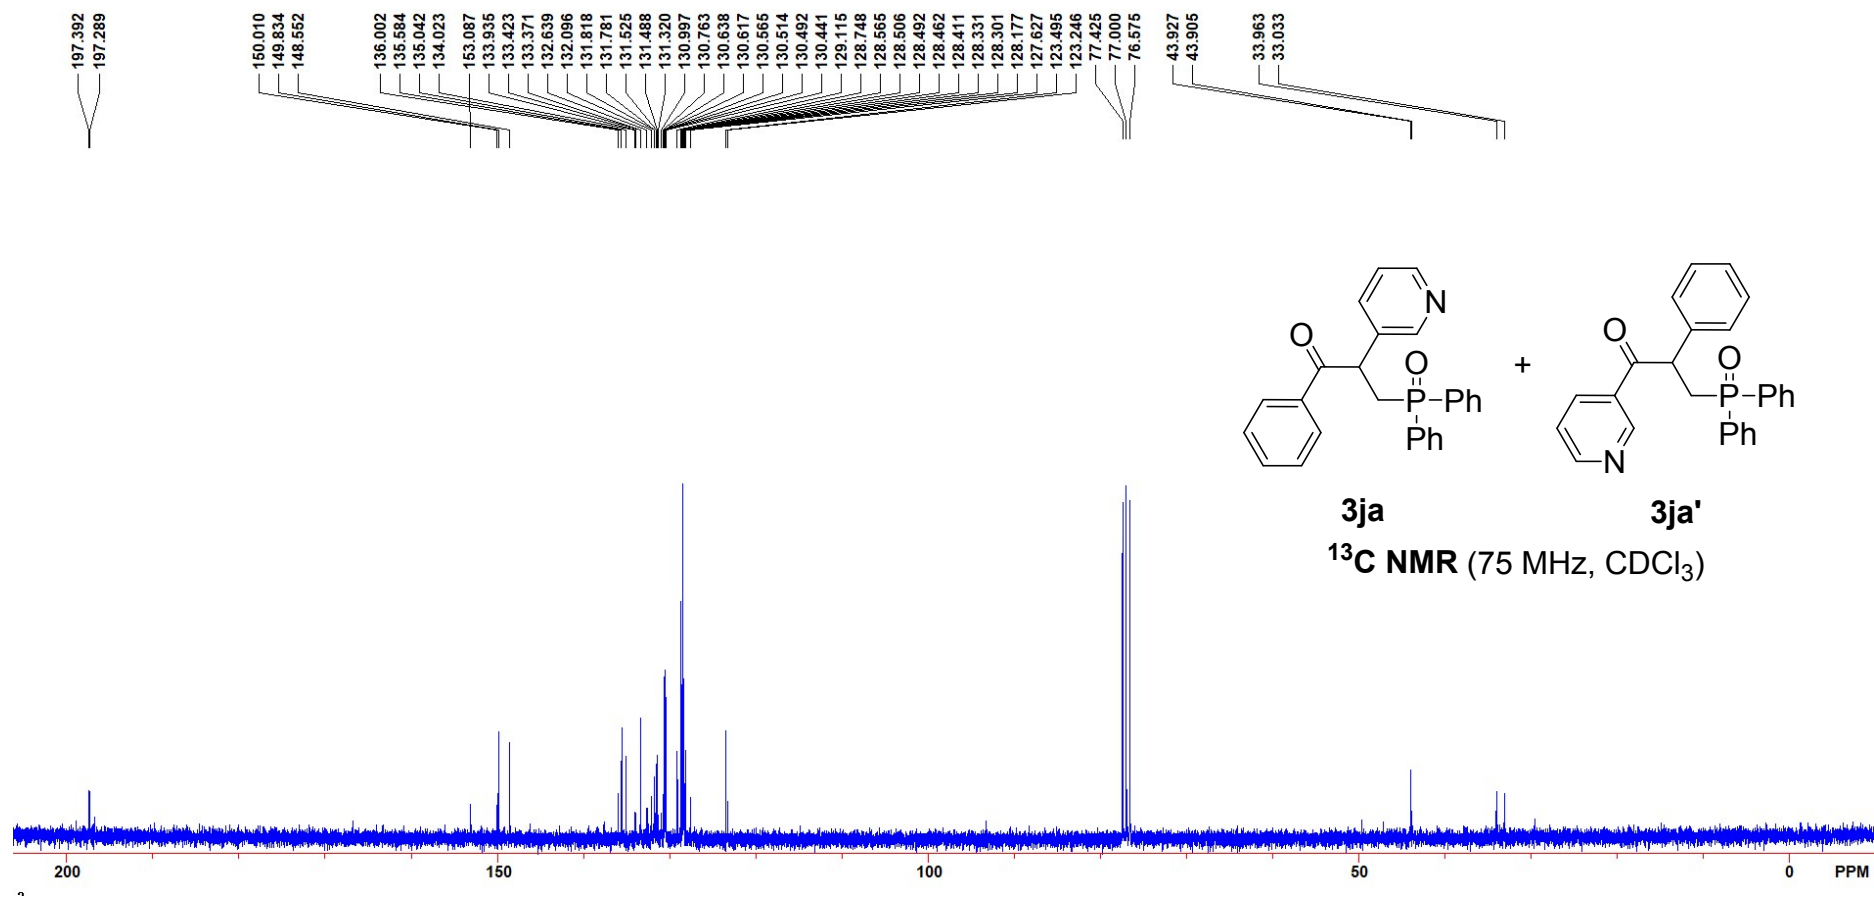

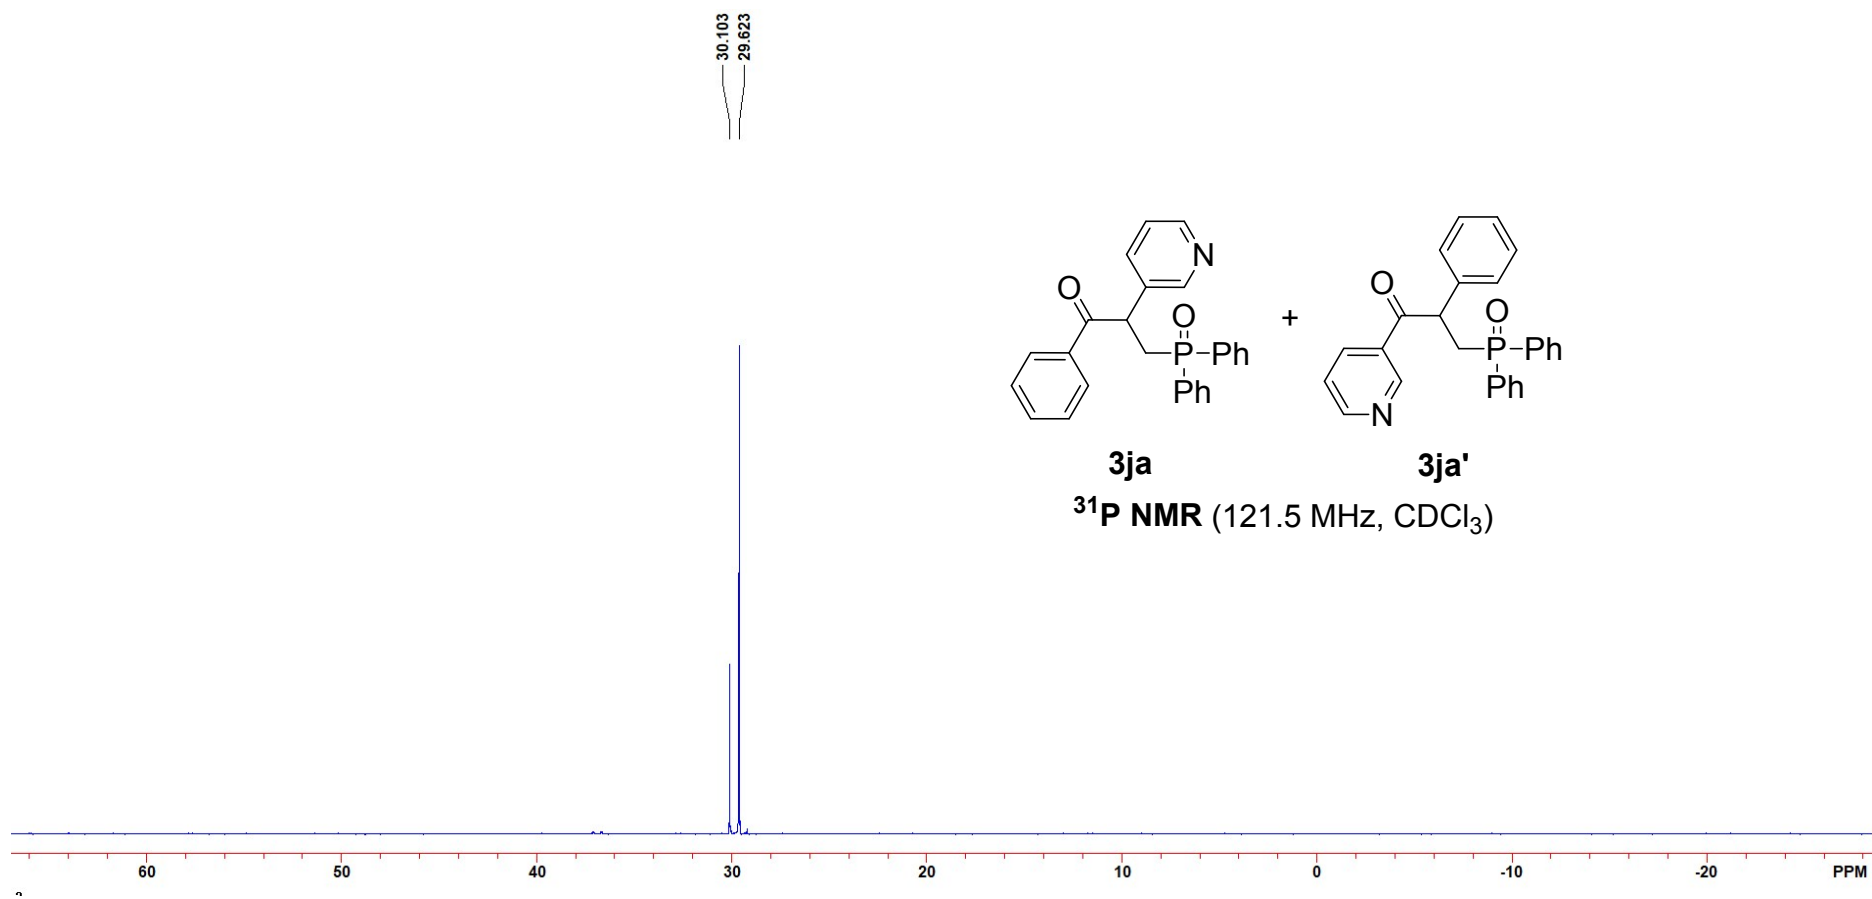

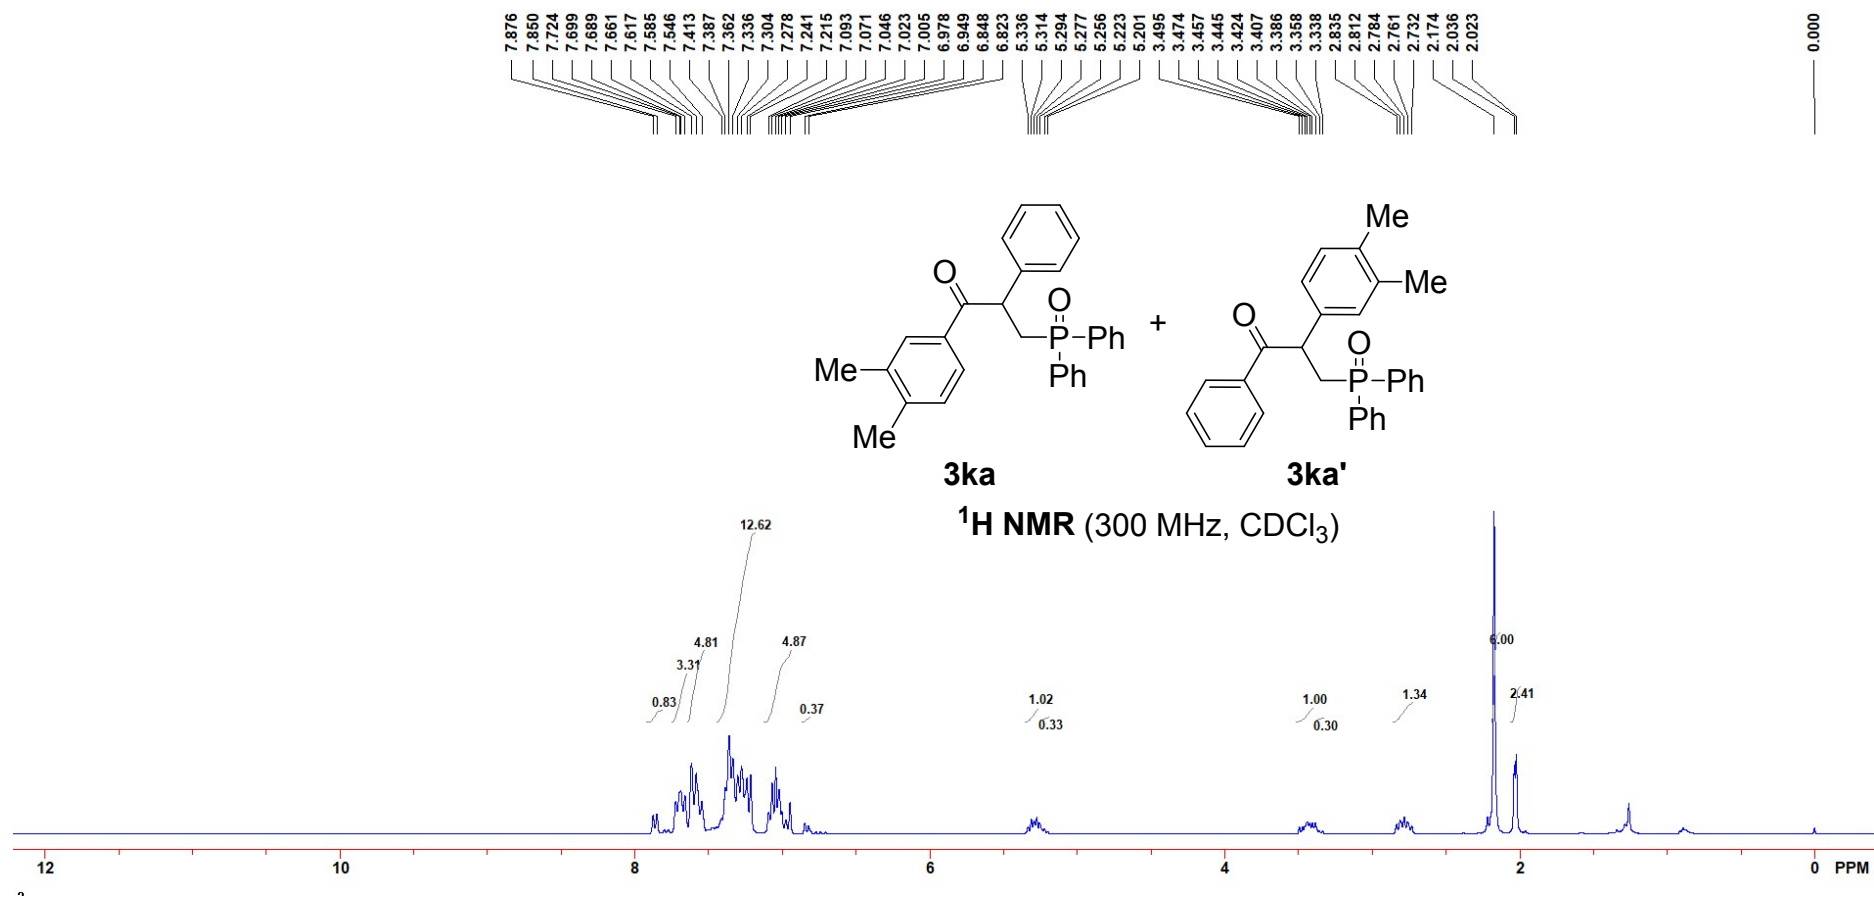

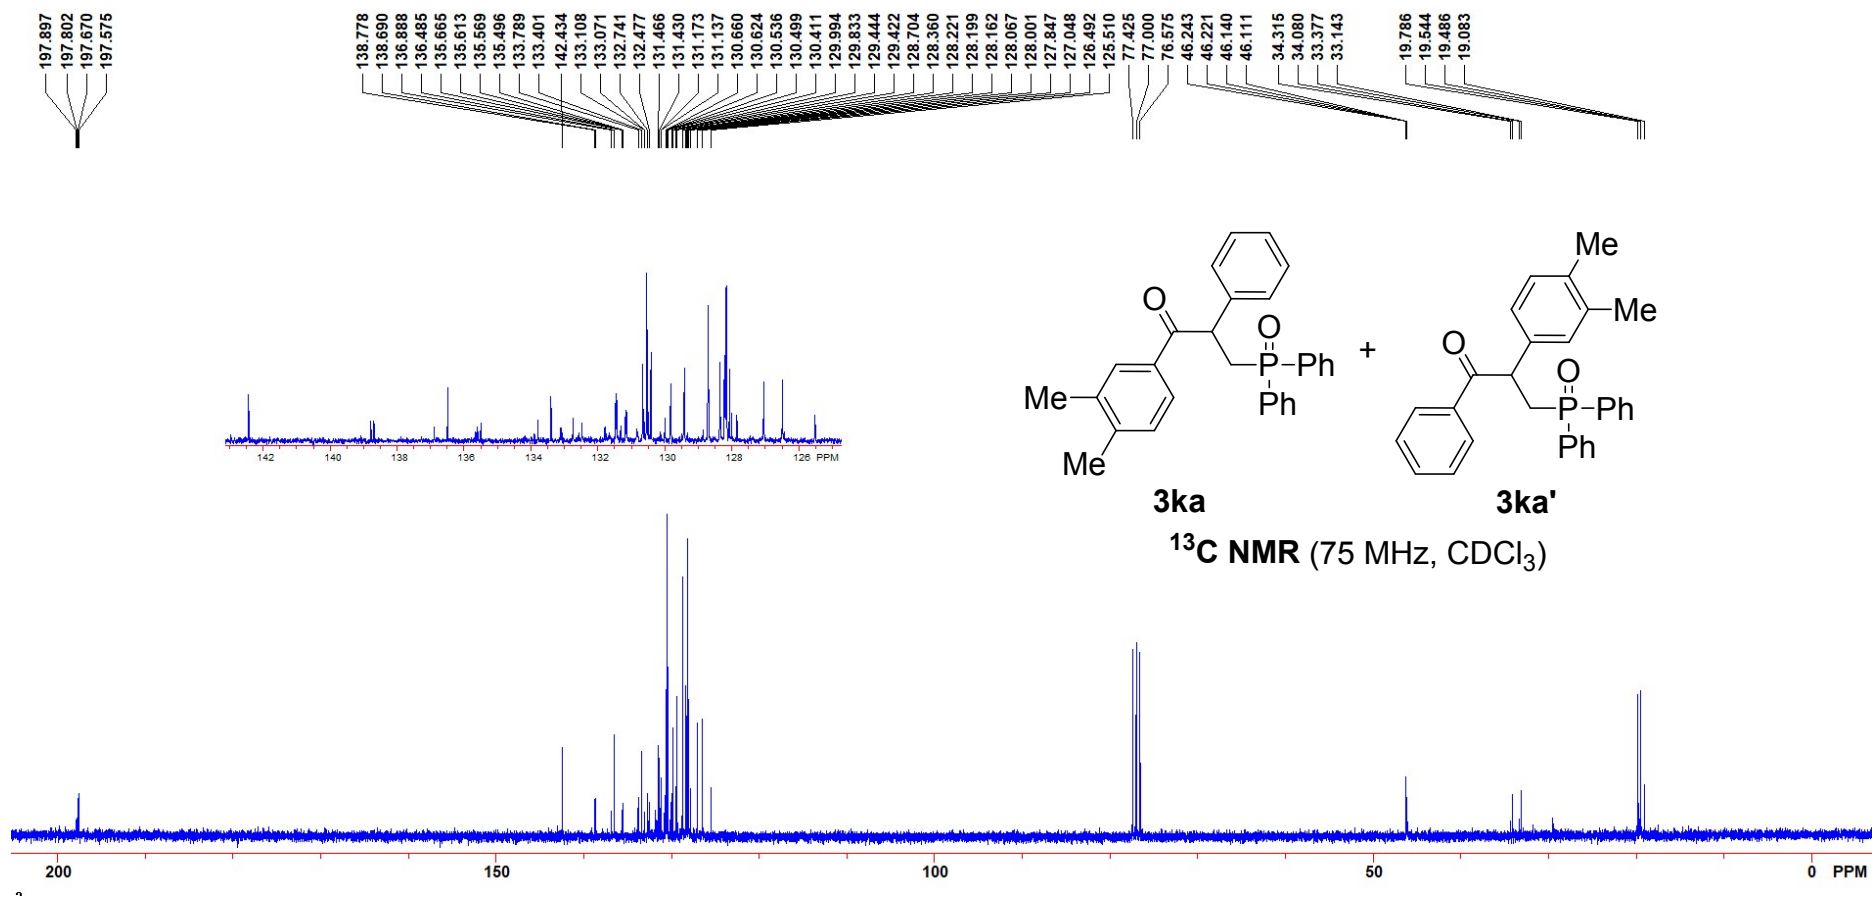

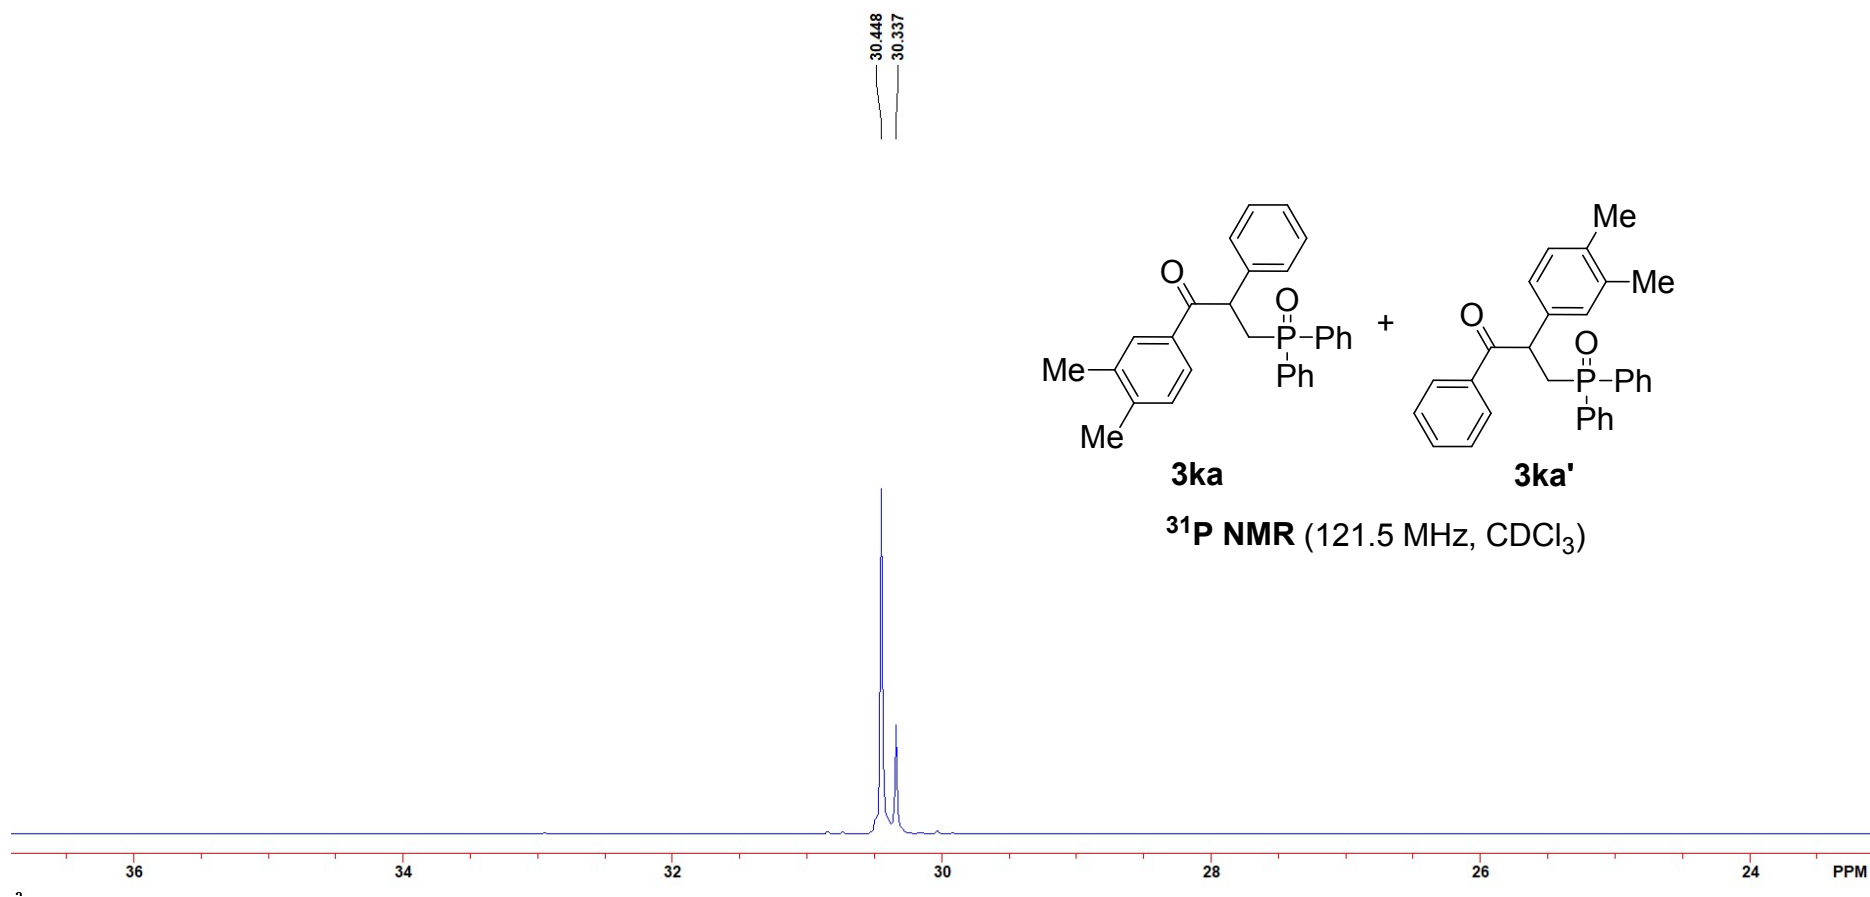

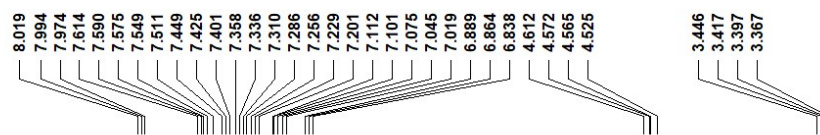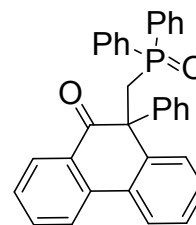

**3la**

$^1\text{H}$  NMR (300 MHz,  $\text{CDCl}_3$ )

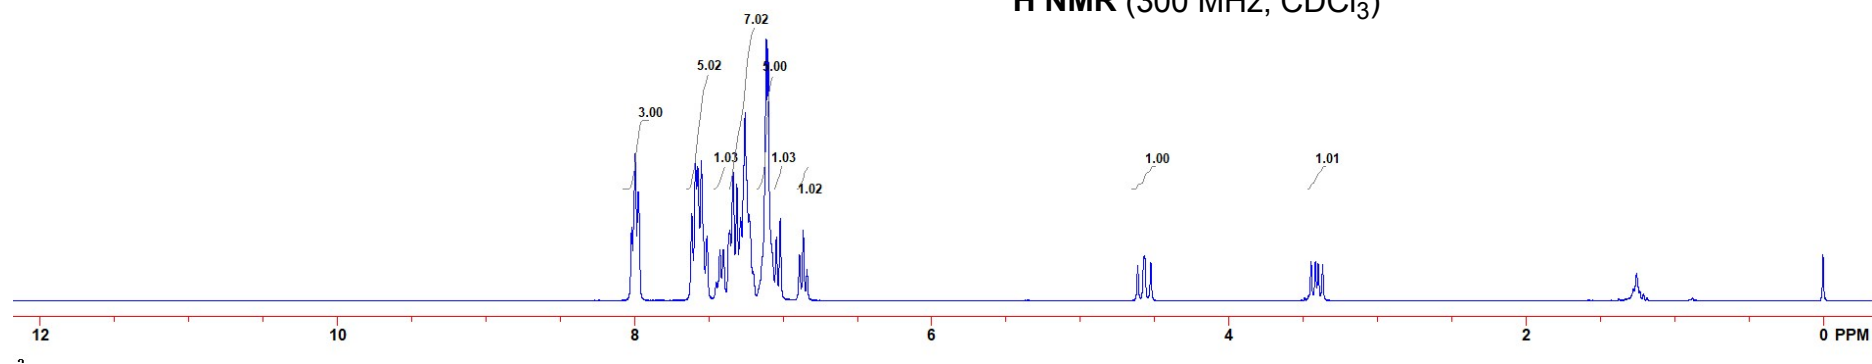

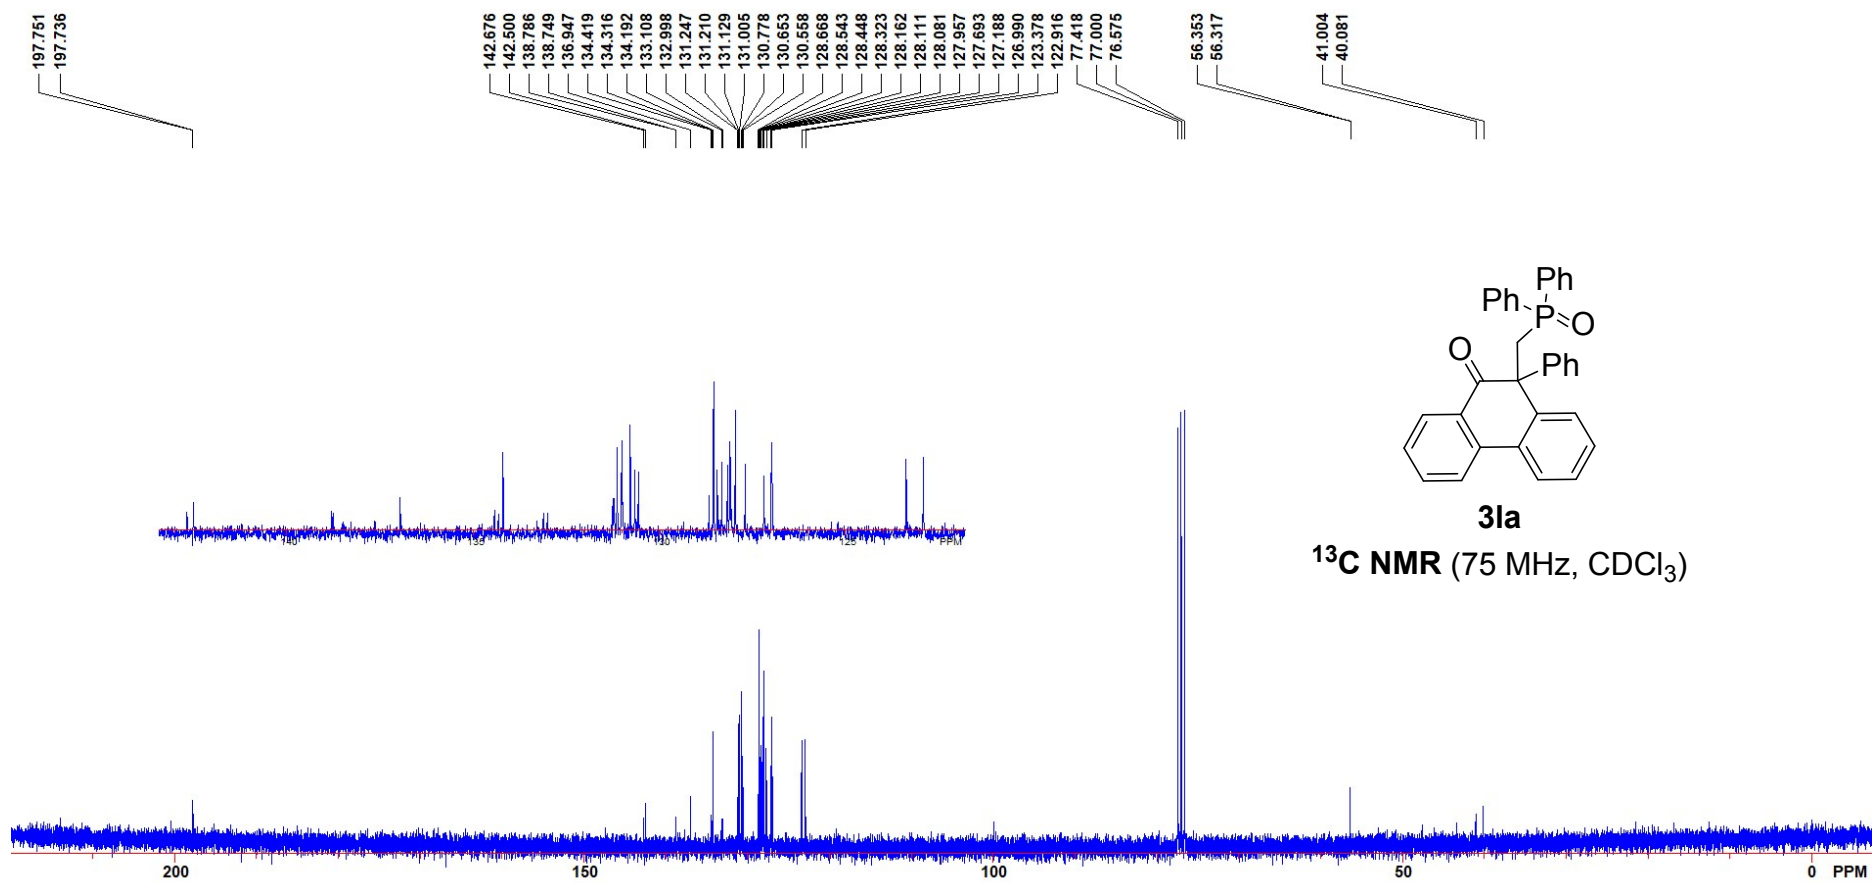



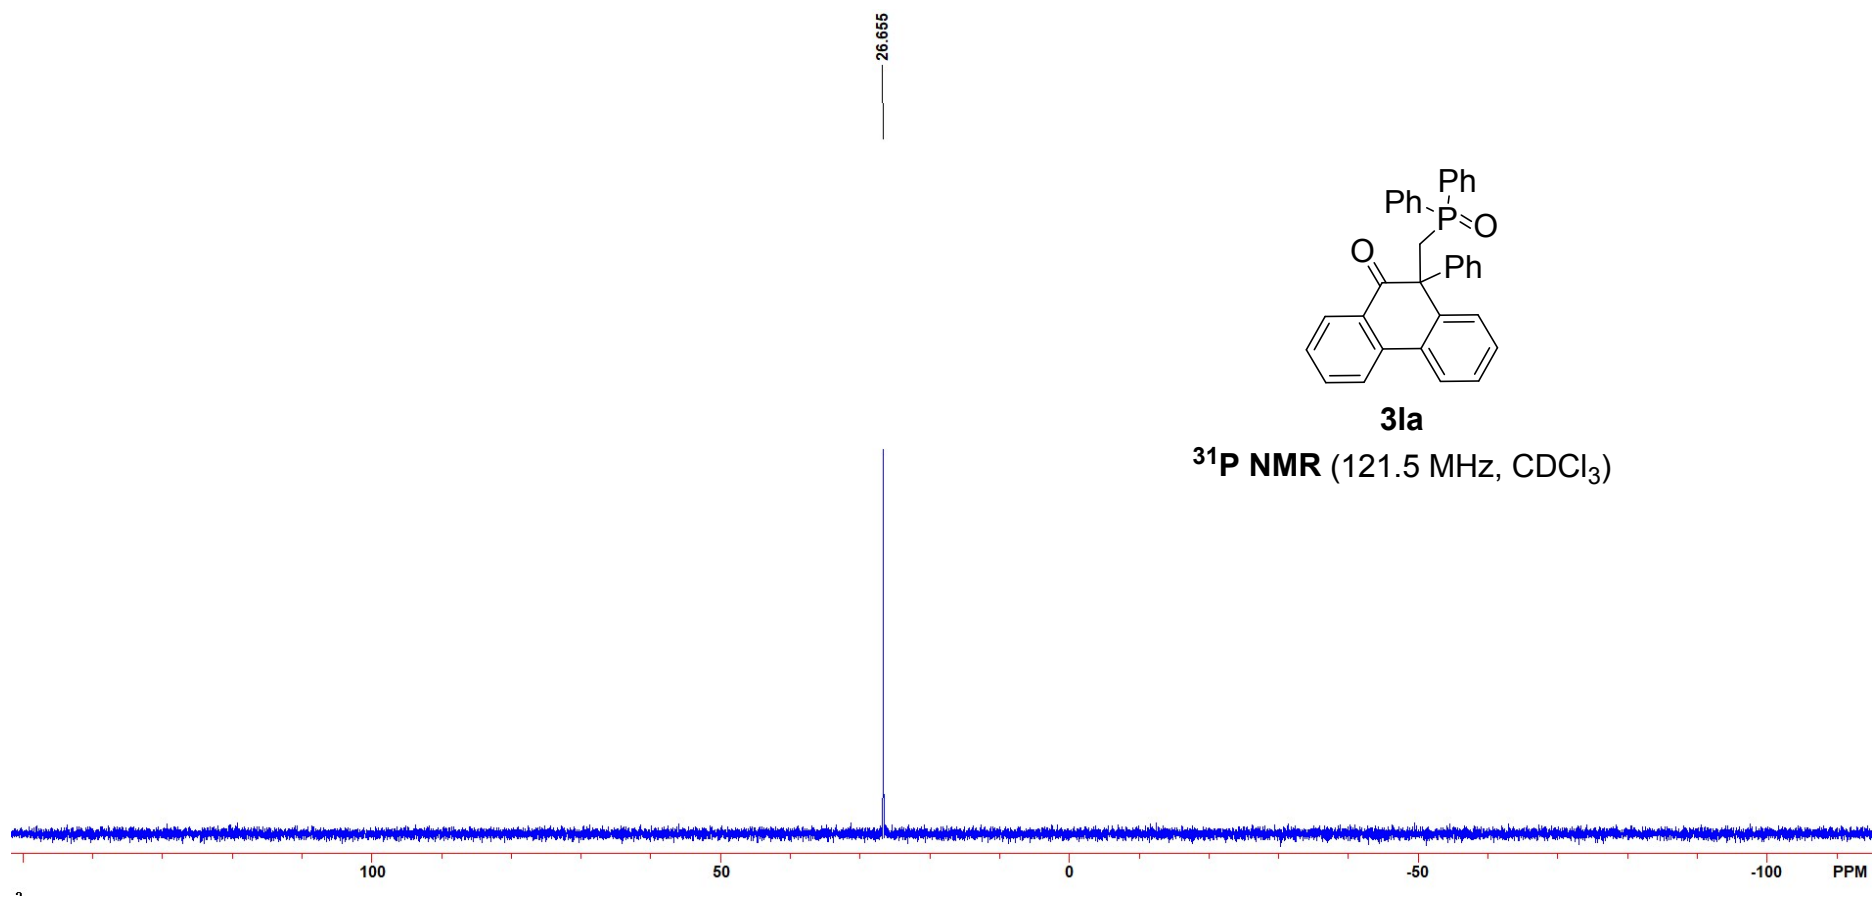

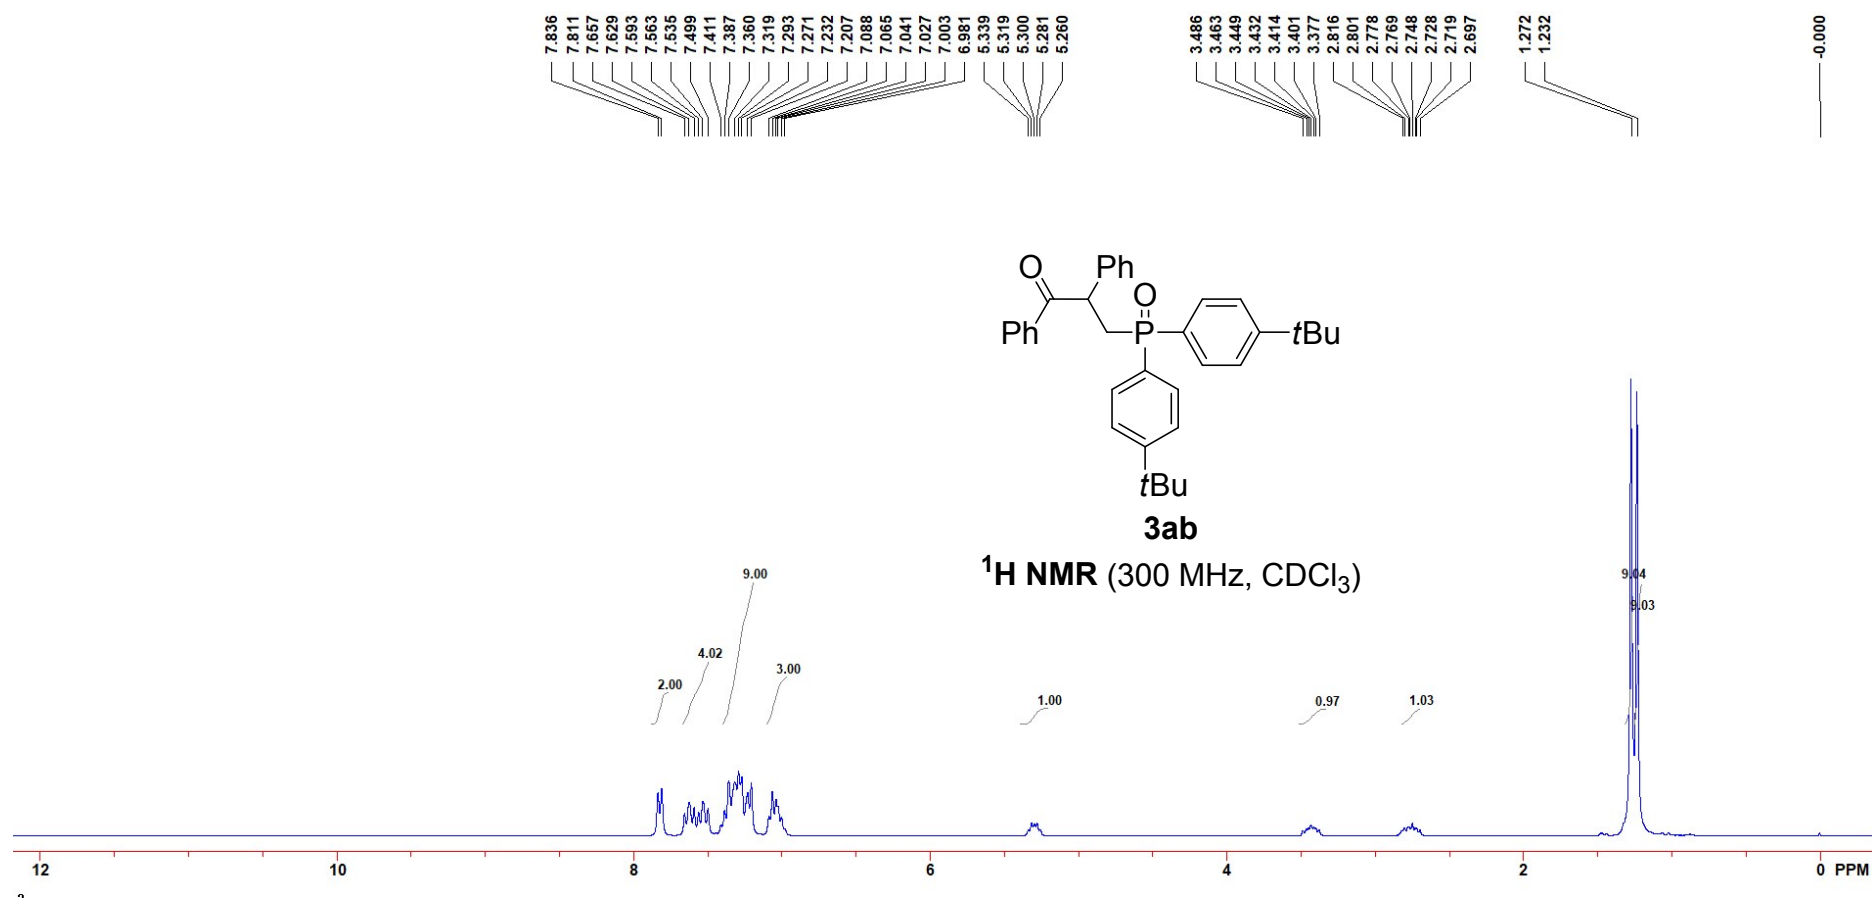

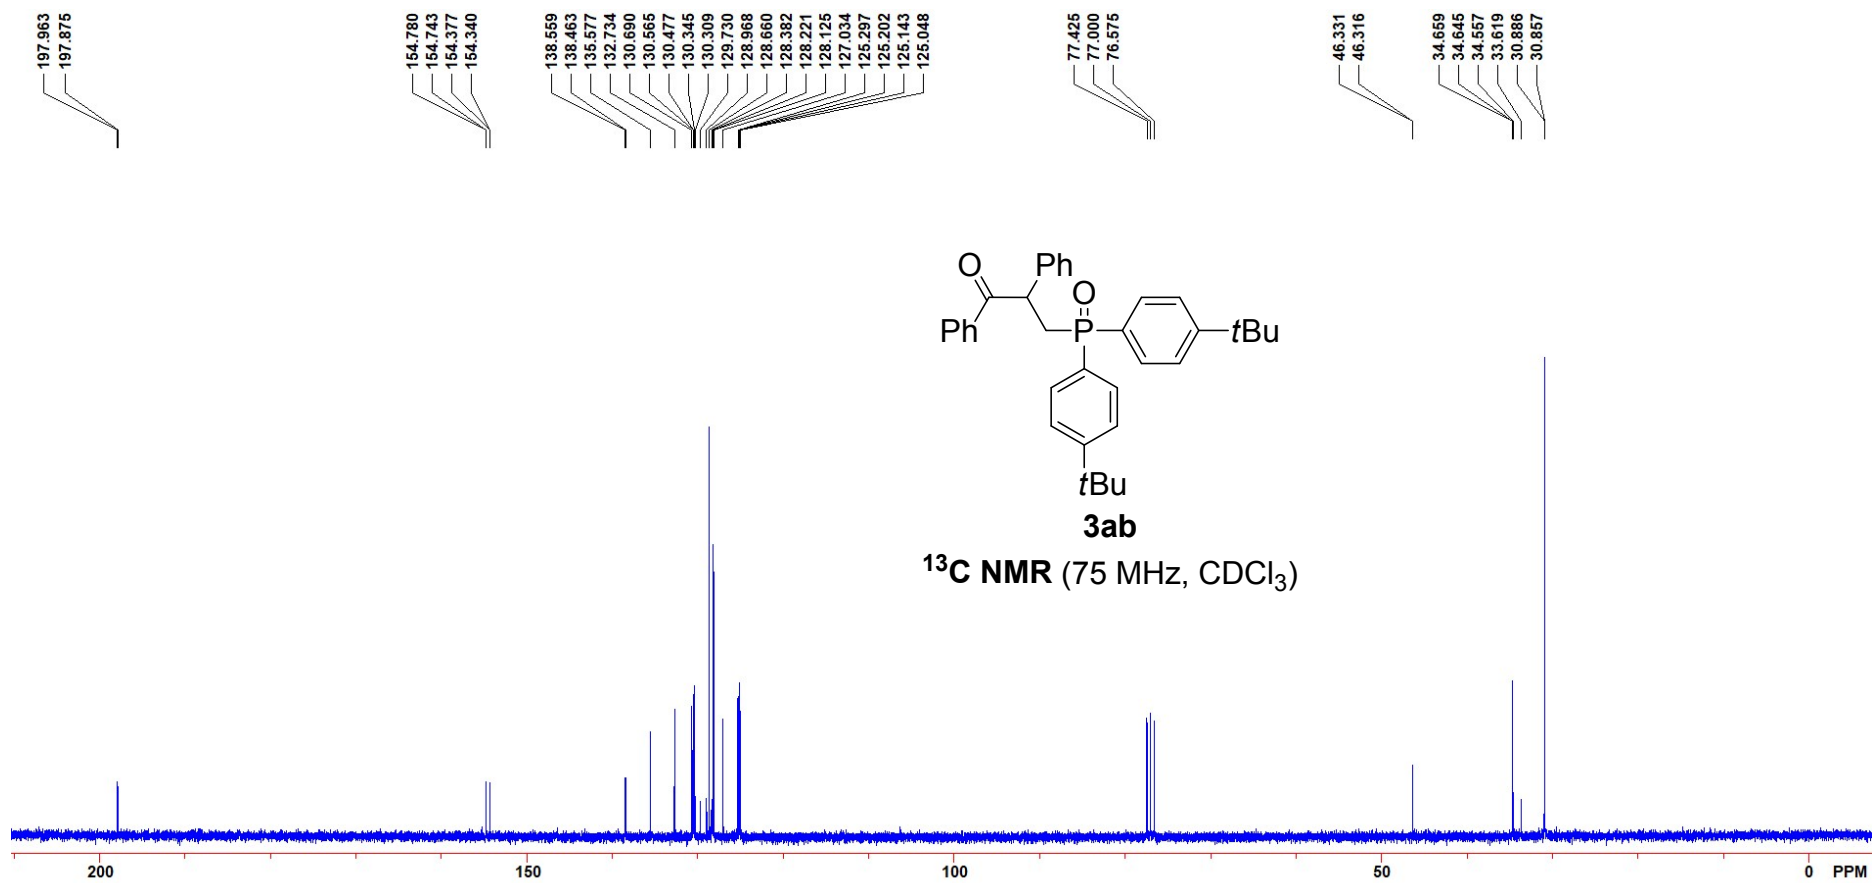

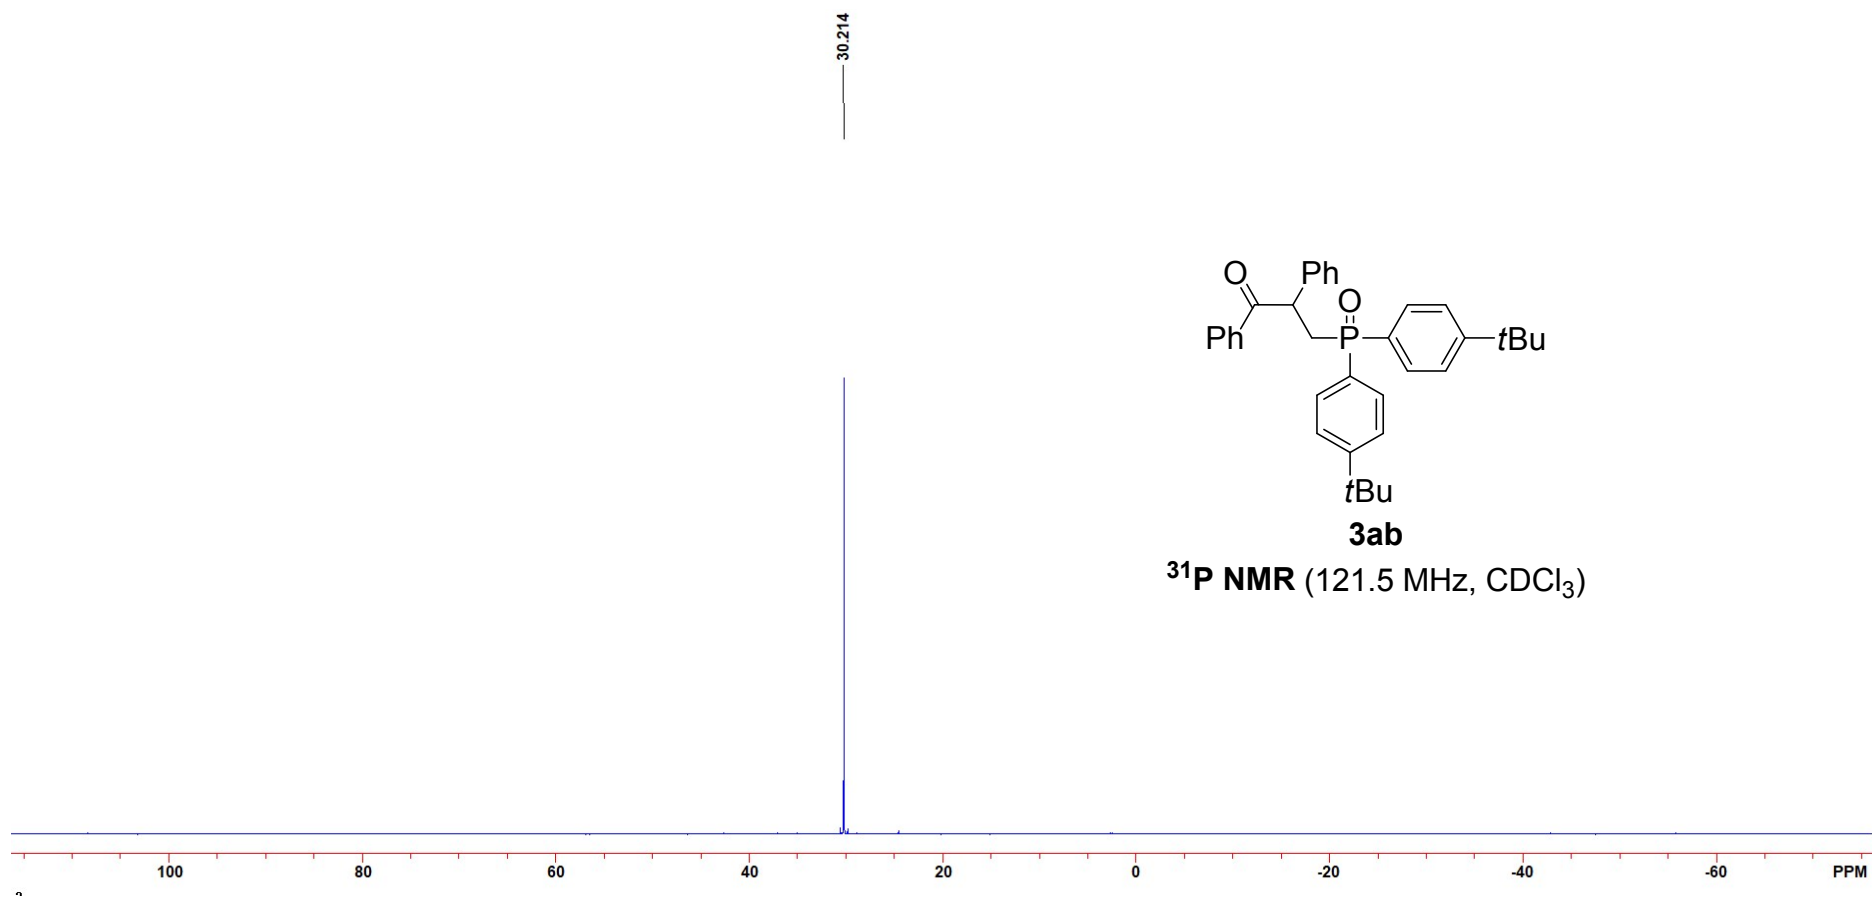

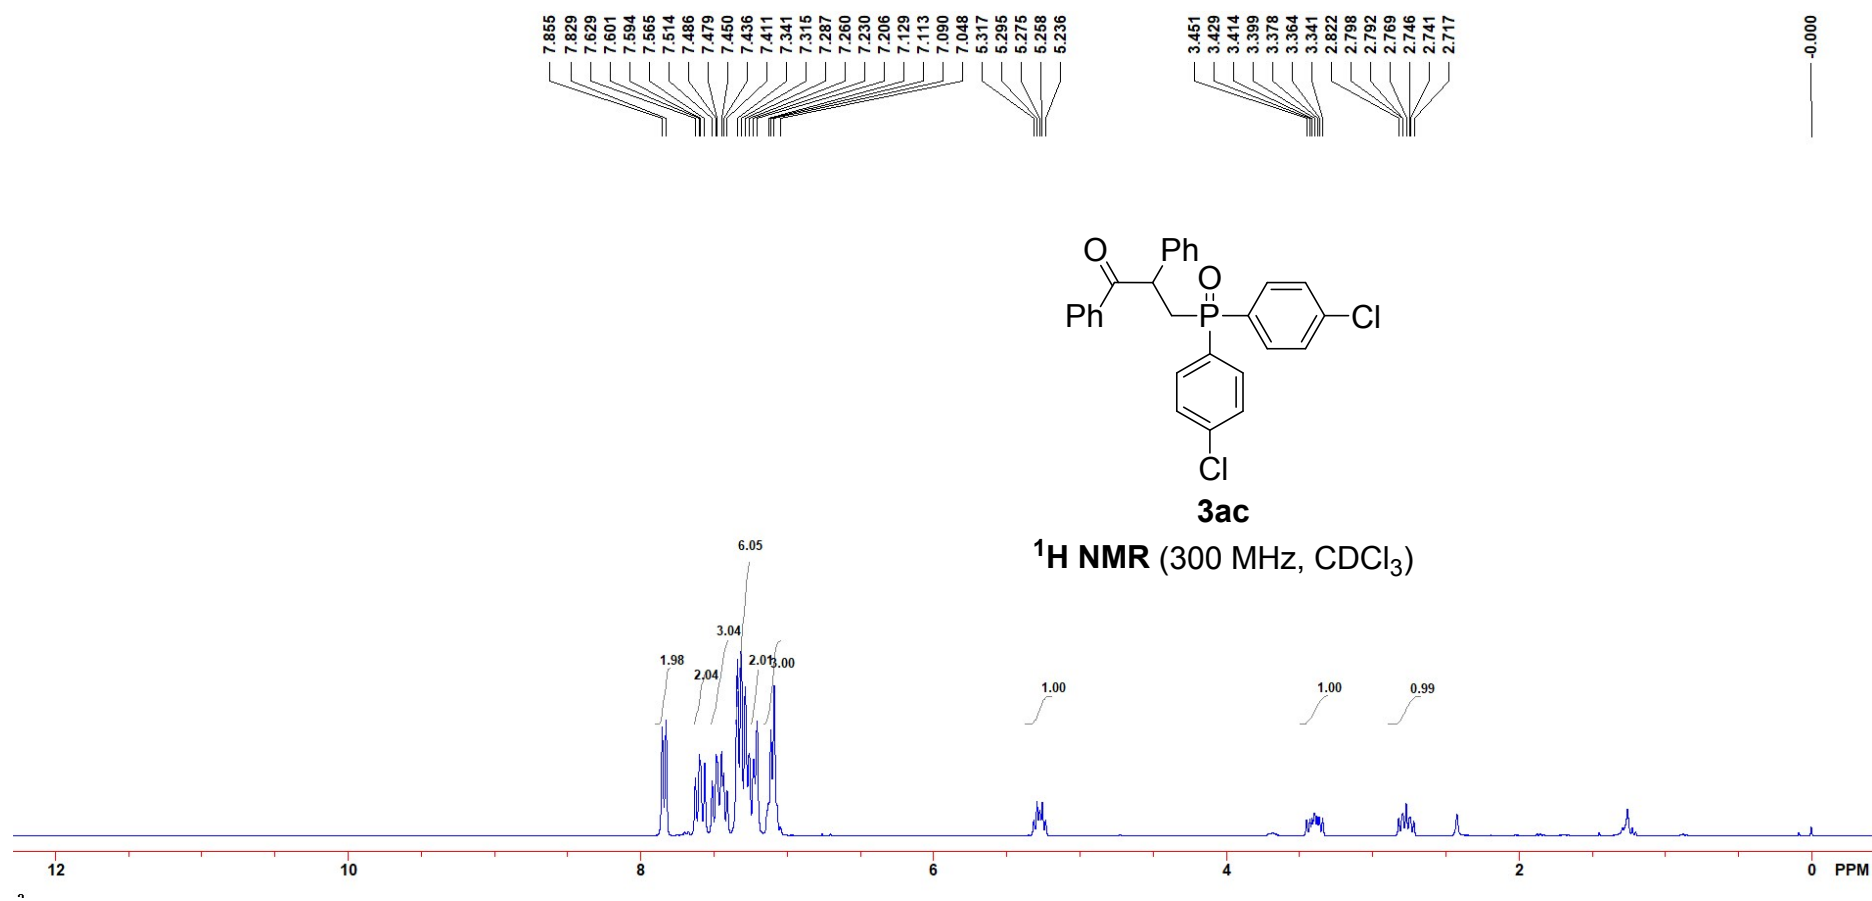

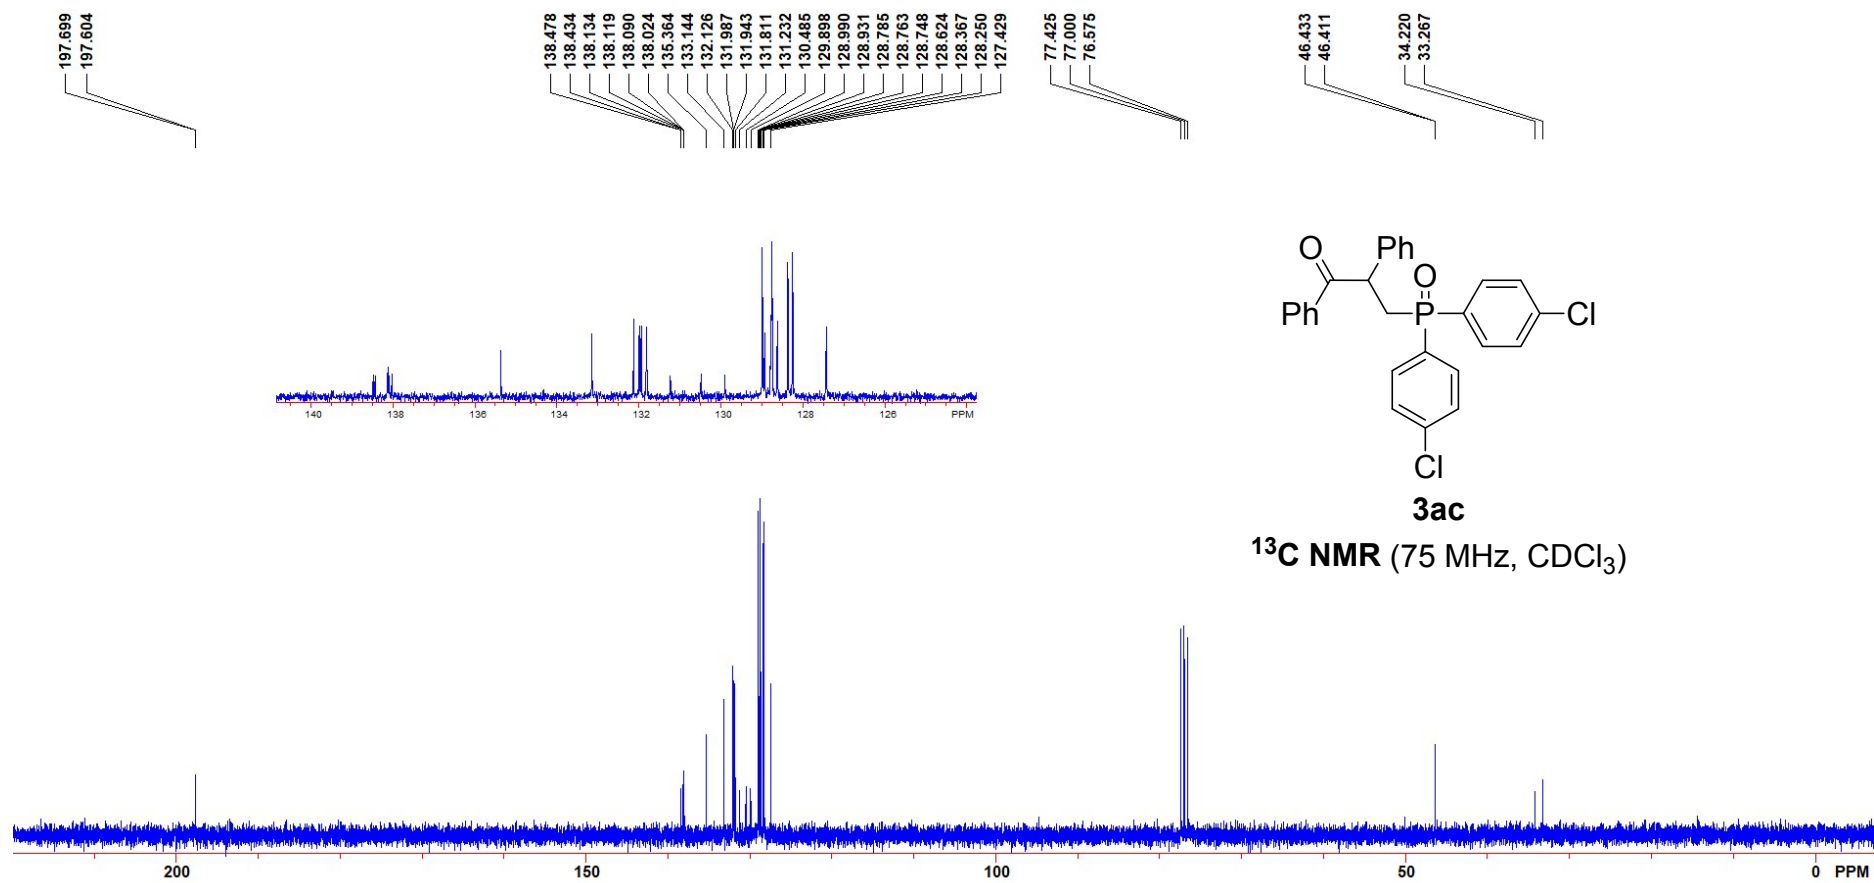

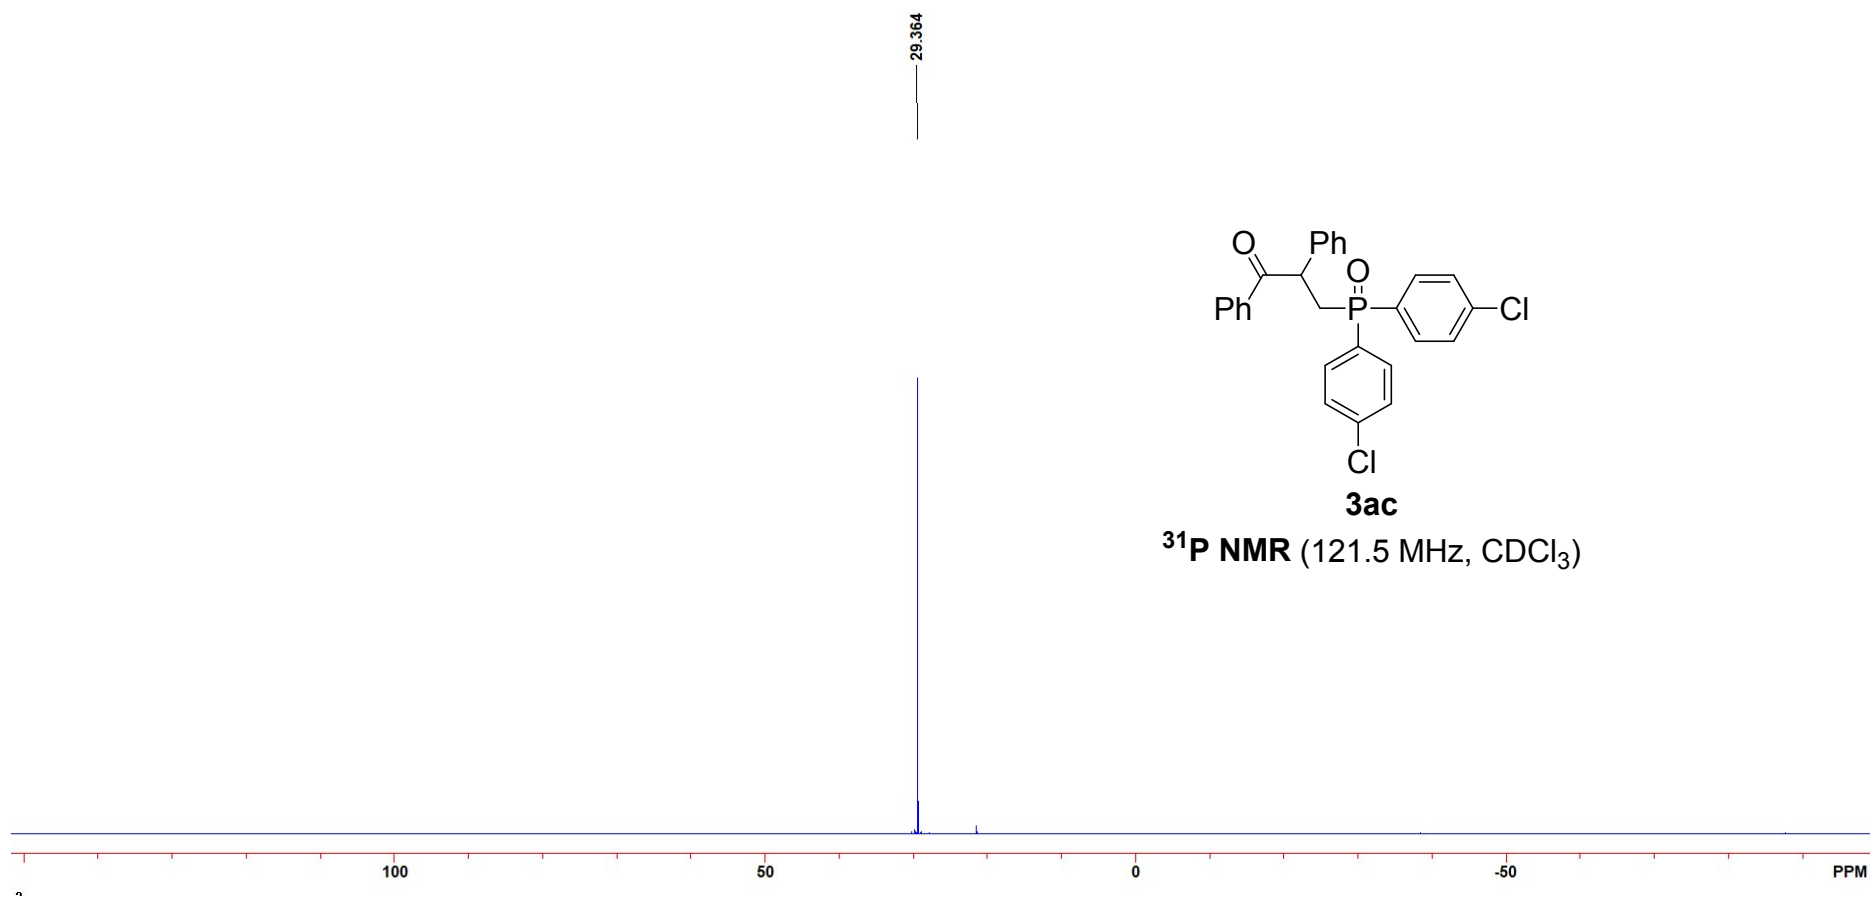

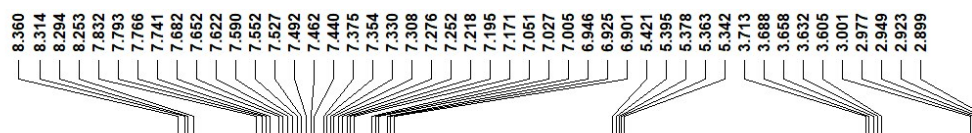

-0.000

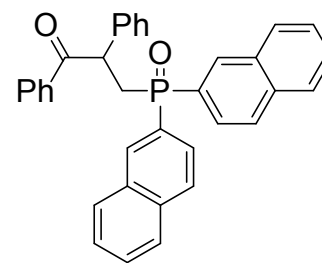

**3ad**

**<sup>1</sup>H NMR (300 MHz, CDCl<sub>3</sub>)**

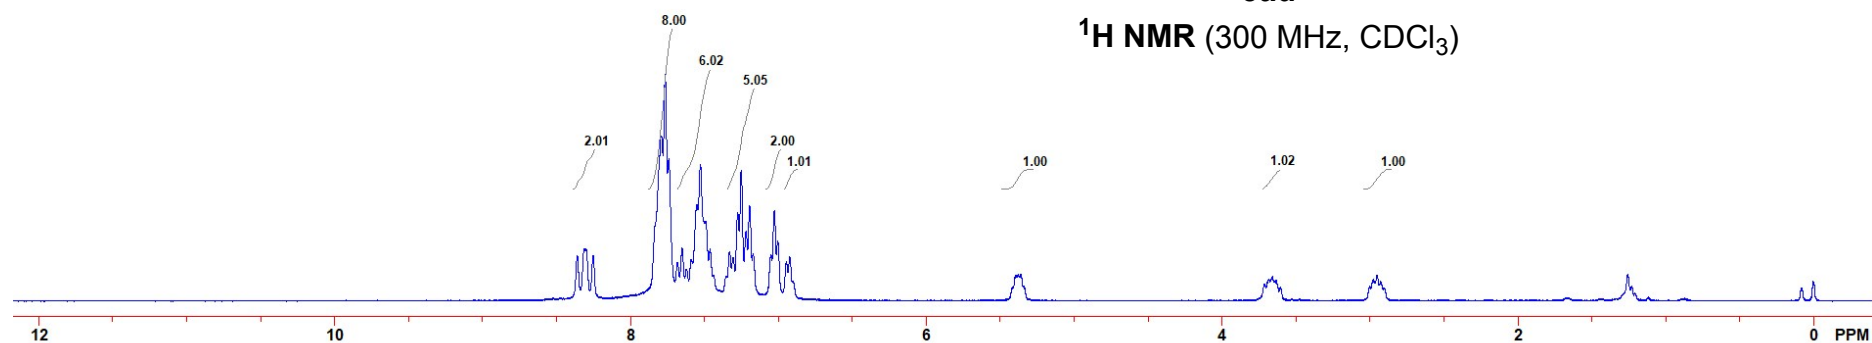



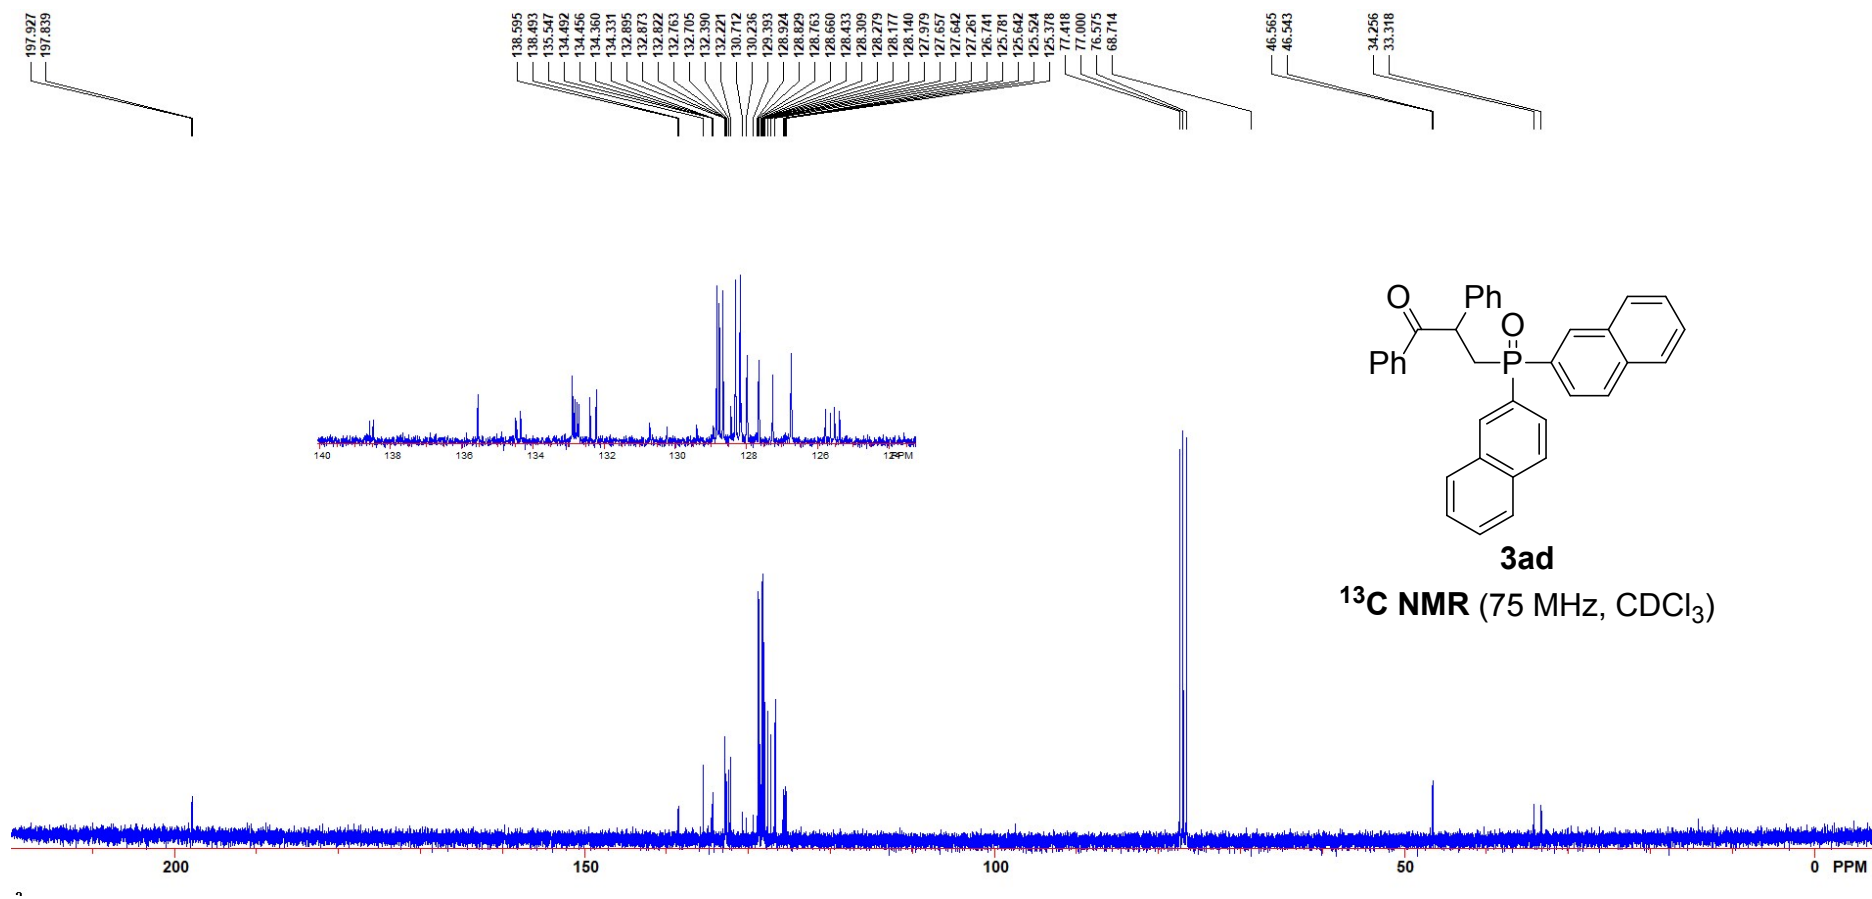

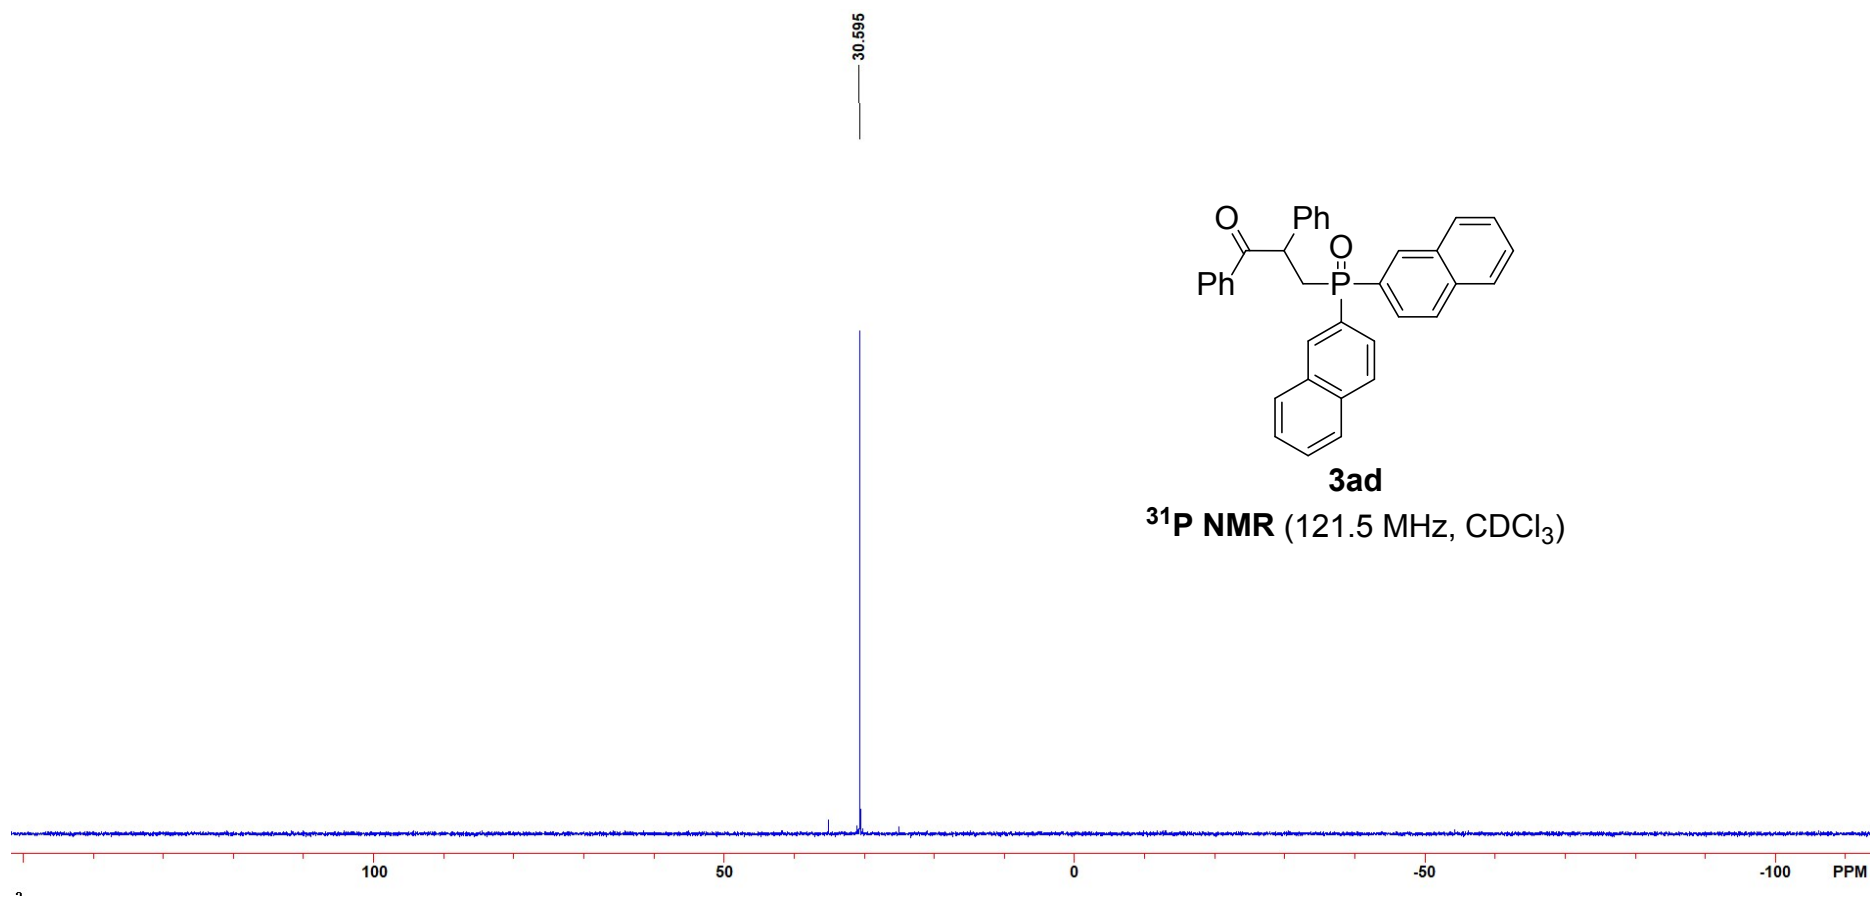

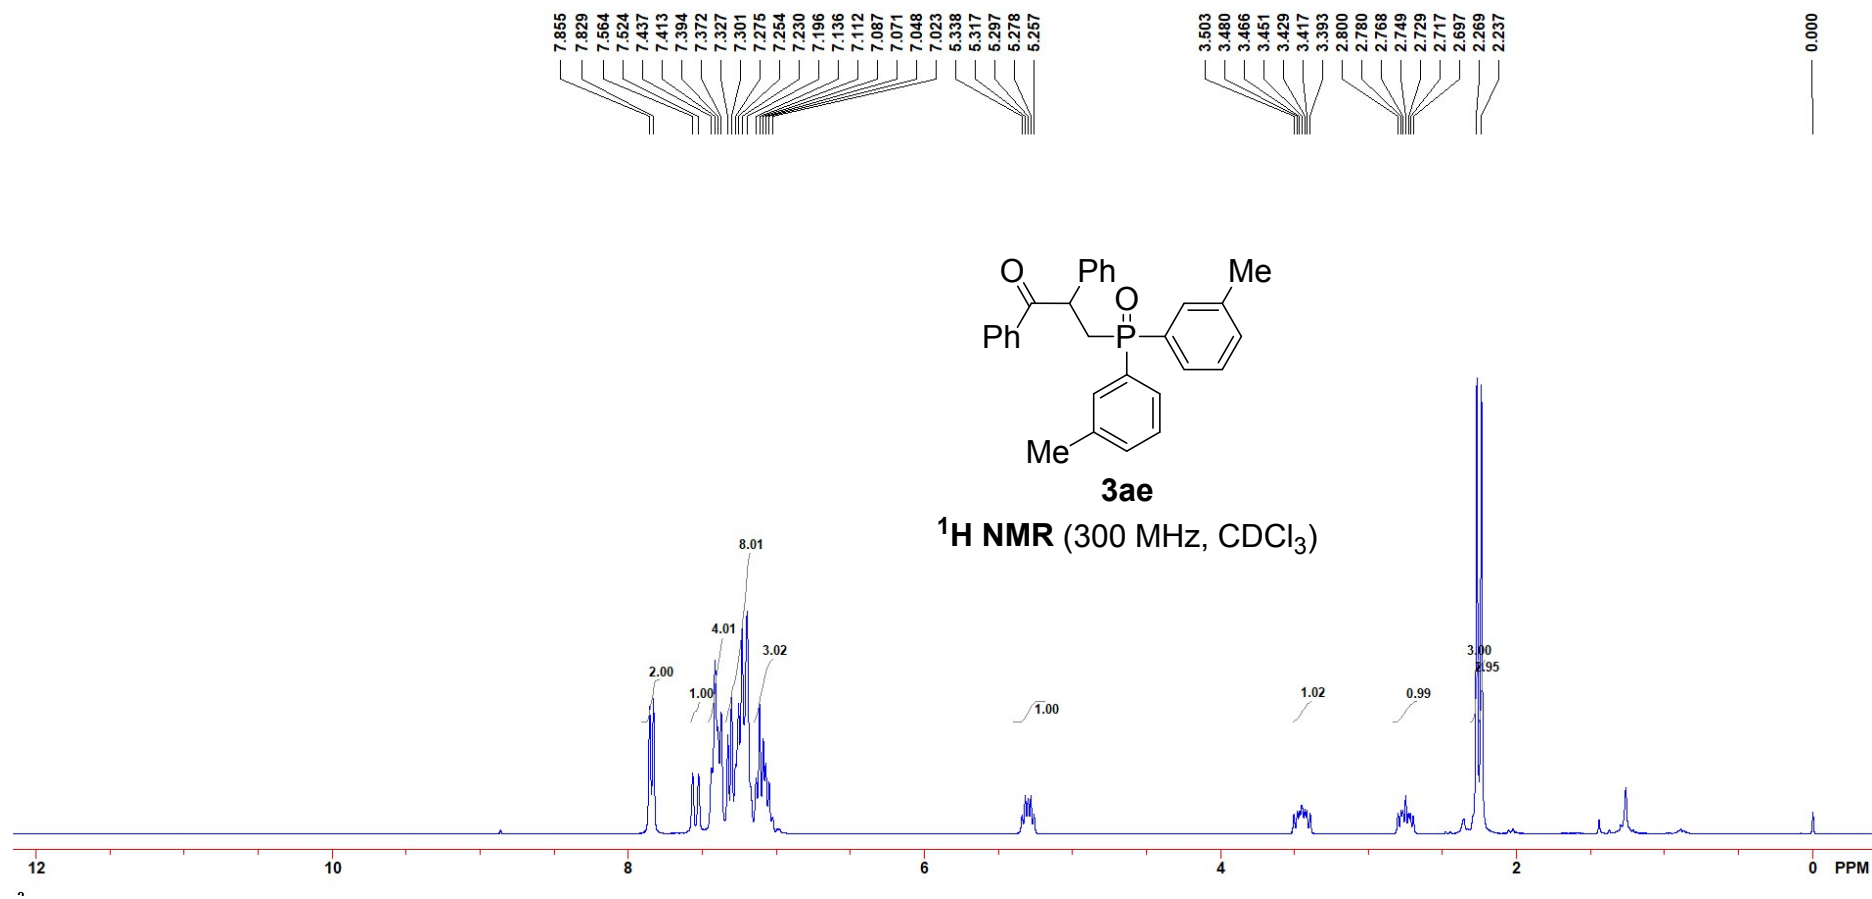

197.912  
197.824

138.683  
138.581  
138.324  
138.170  
138.112  
137.958  
135.635  
133.547  
132.917  
132.866  
132.331  
132.294  
132.236  
132.155  
132.118  
131.613  
131.335  
131.210  
131.093  
128.756  
128.331  
128.257  
128.243  
128.162  
128.074  
127.752  
127.642  
127.613  
127.517  
127.210  
77.425  
77.000  
76.575

46.418  
46.397  
34.359  
33.428  
21.215  
21.178

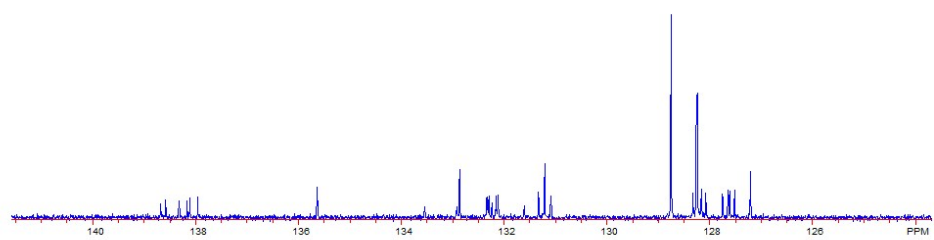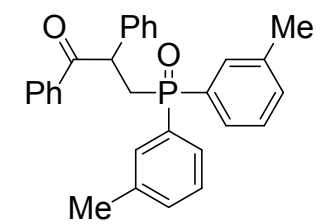

**3ae**

<sup>13</sup>C NMR (75 MHz, CDCl<sub>3</sub>)

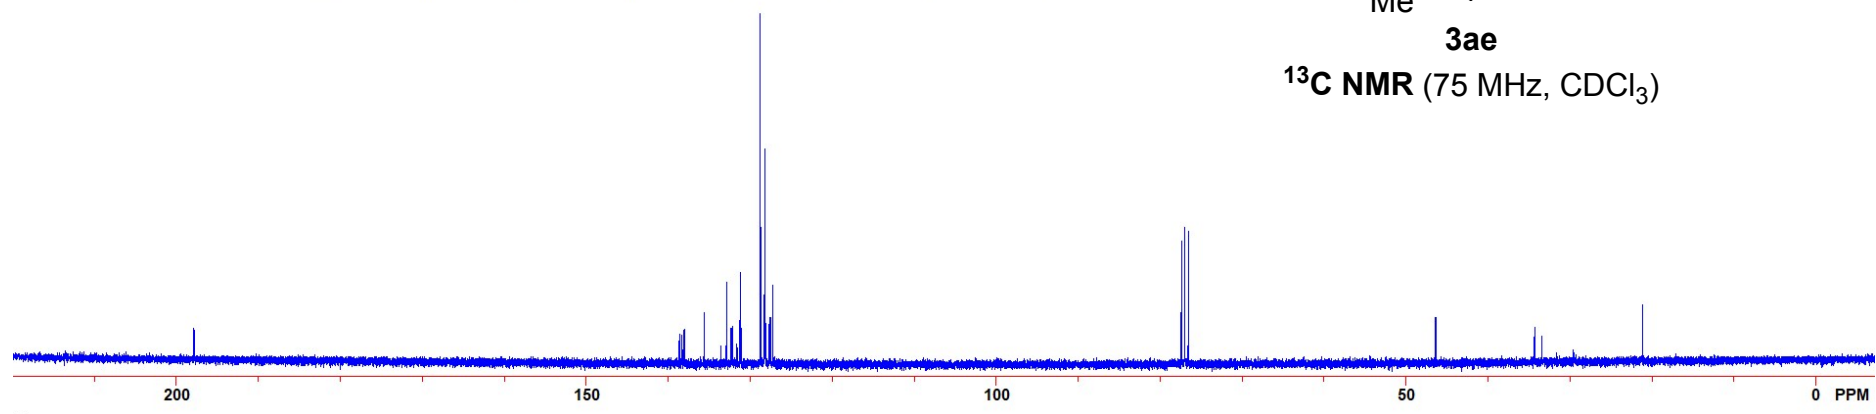

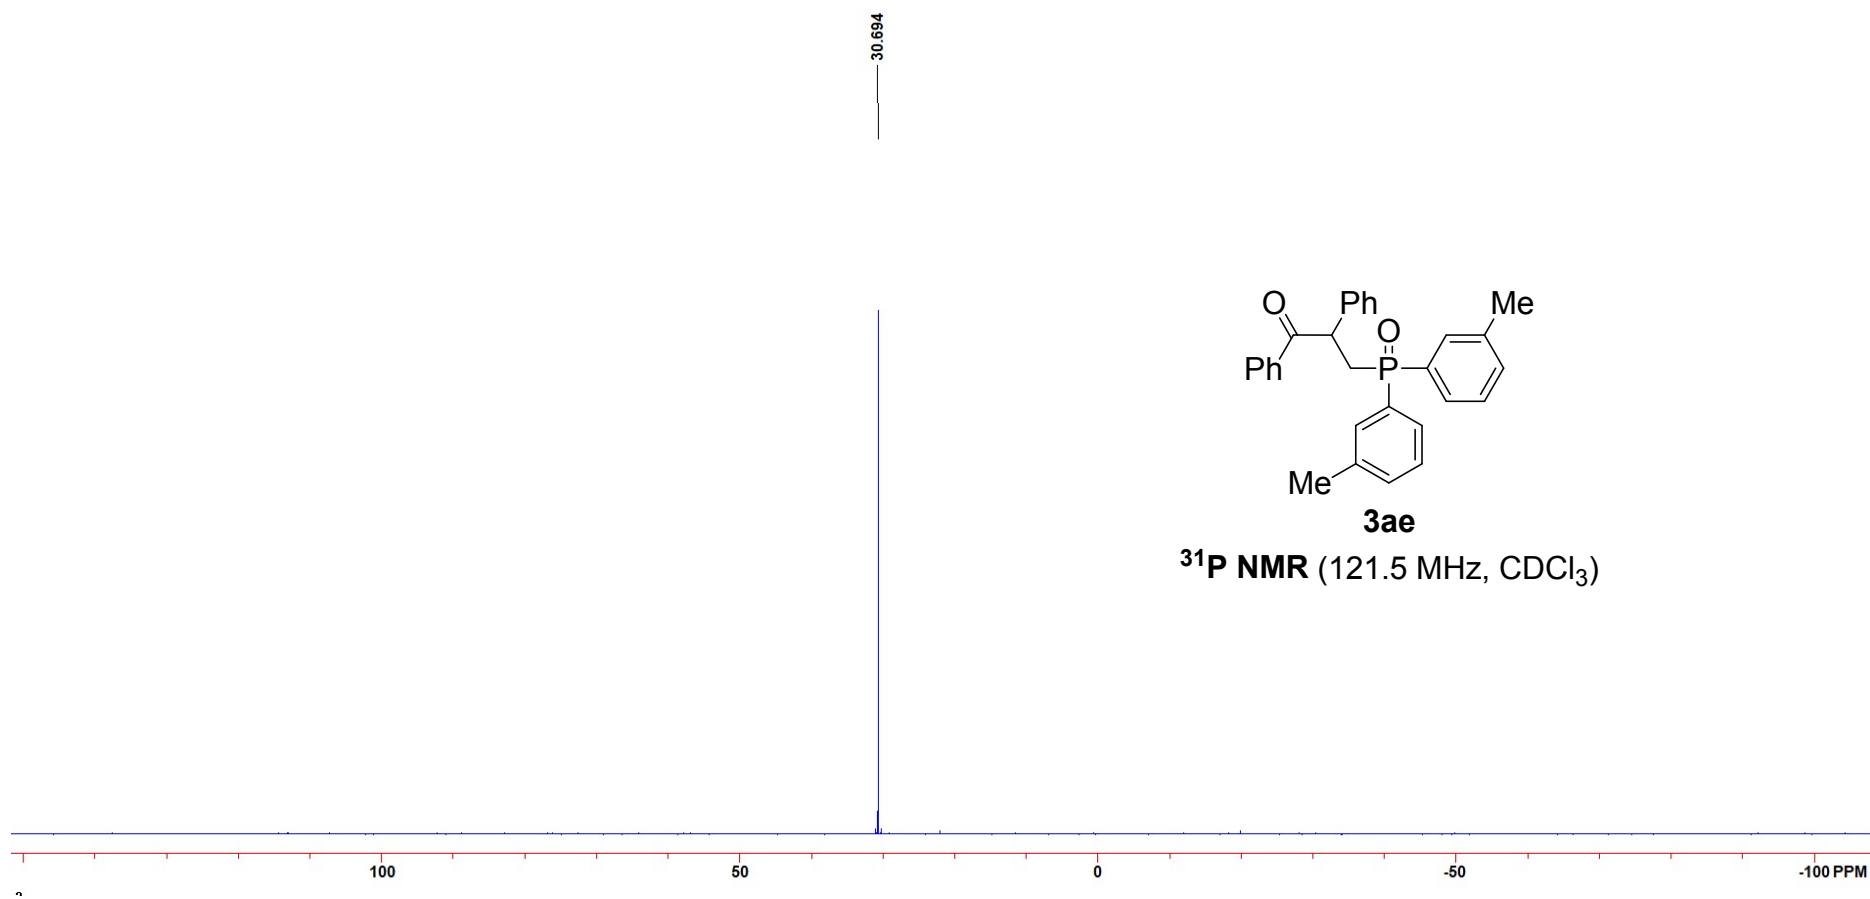

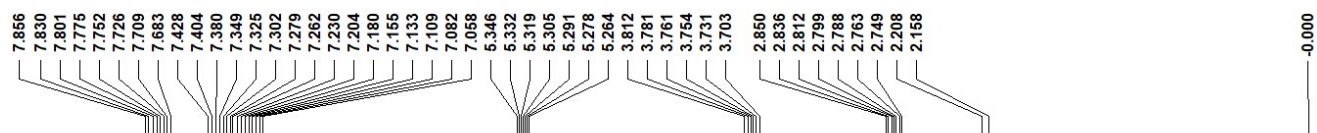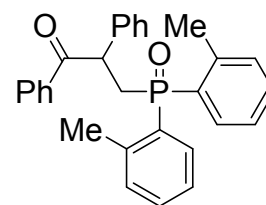

**3af**

<sup>1</sup>H NMR (300 MHz, CDCl<sub>3</sub>)

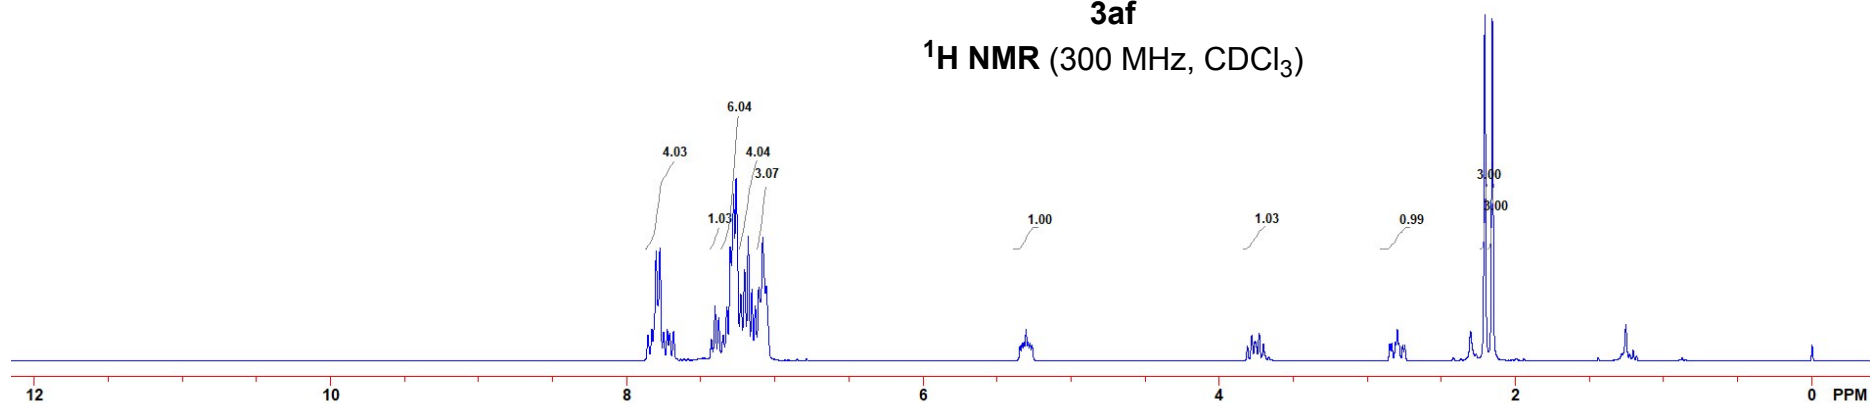

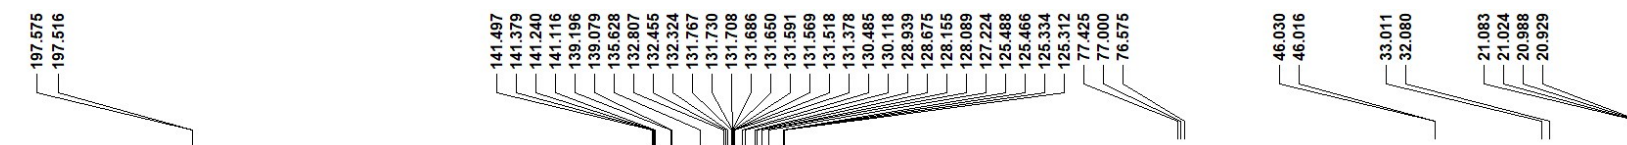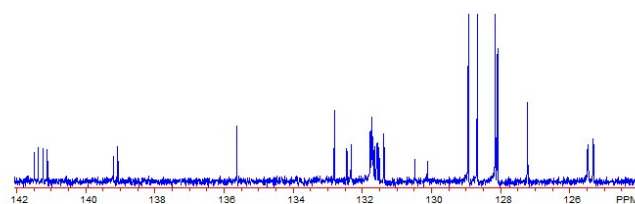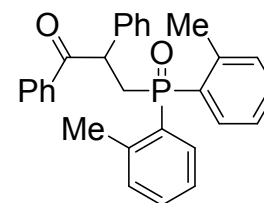

**3af**

**<sup>13</sup>C NMR (75 MHz, CDCl<sub>3</sub>)**

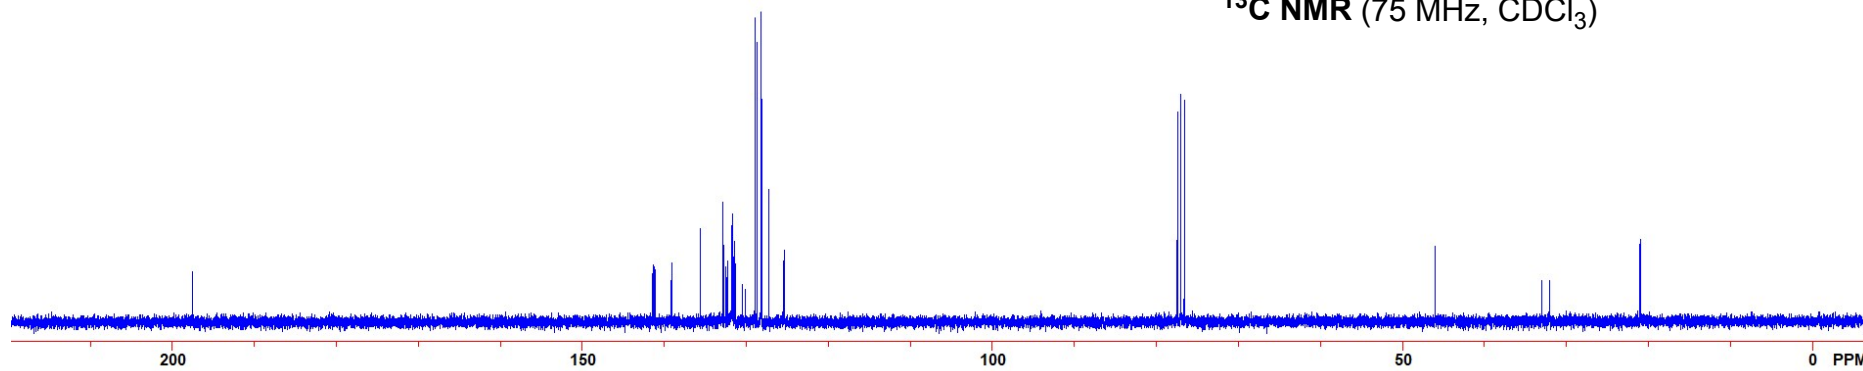

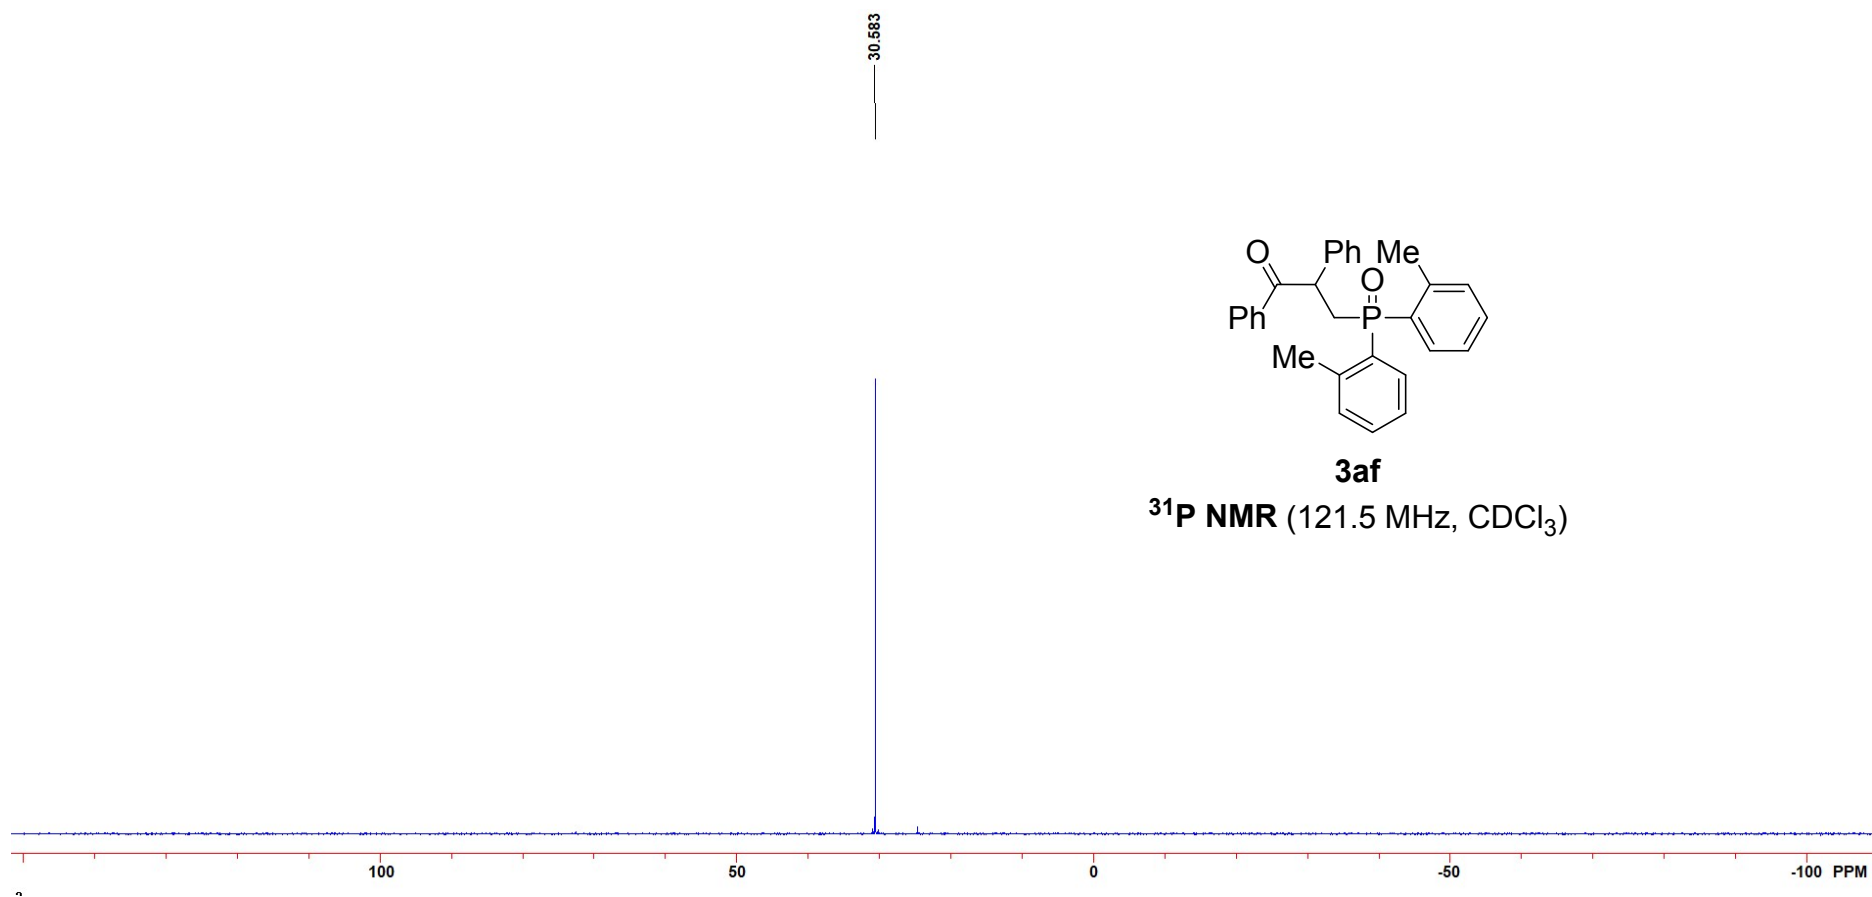



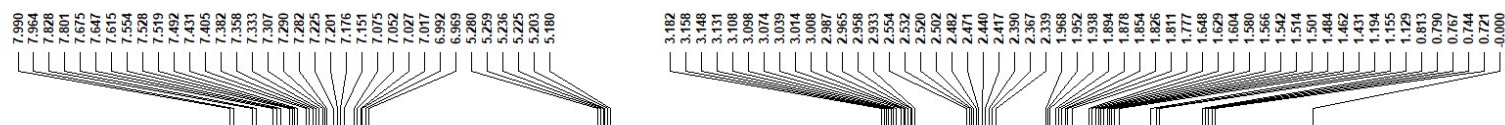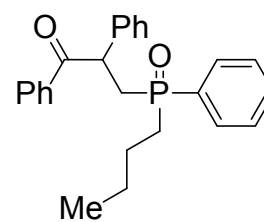

**3ag**

<sup>1</sup>H NMR (300 MHz, CDCl<sub>3</sub>)

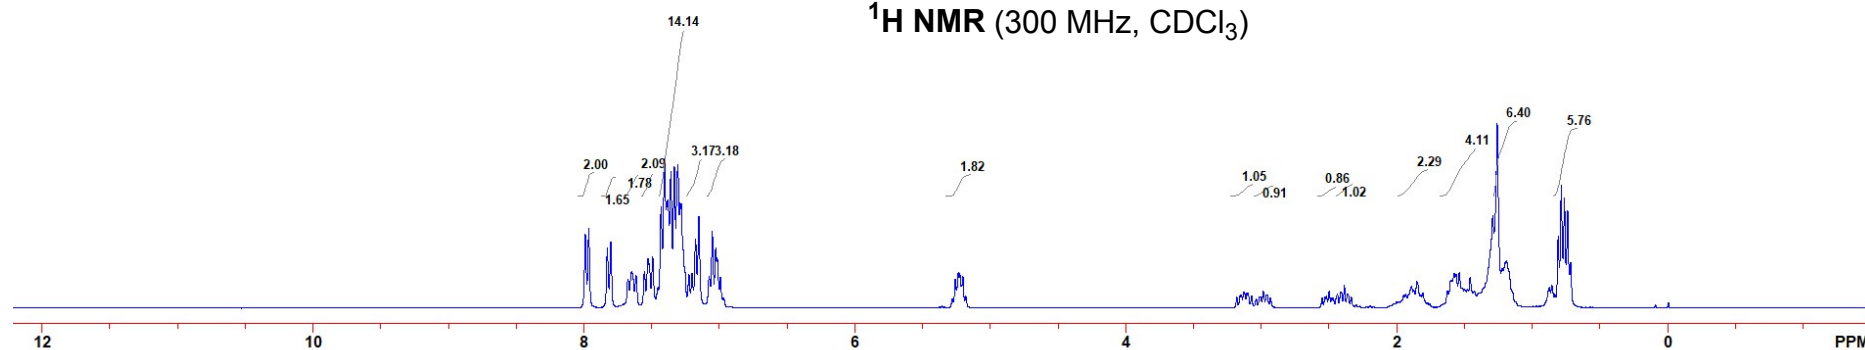

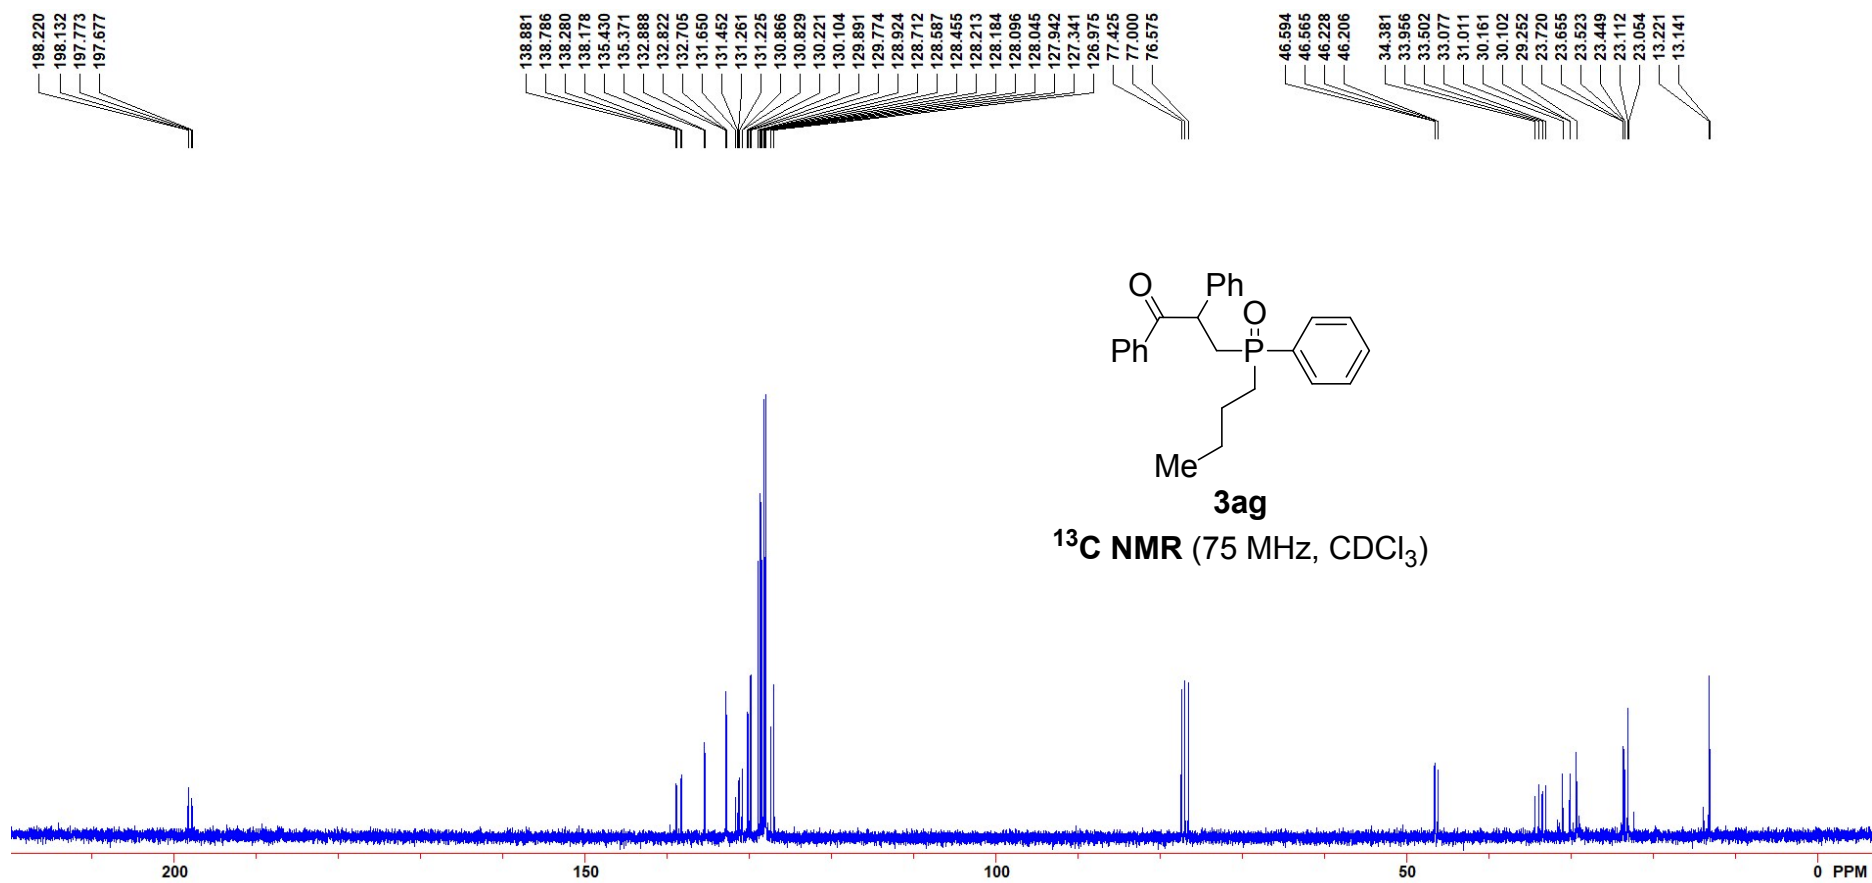

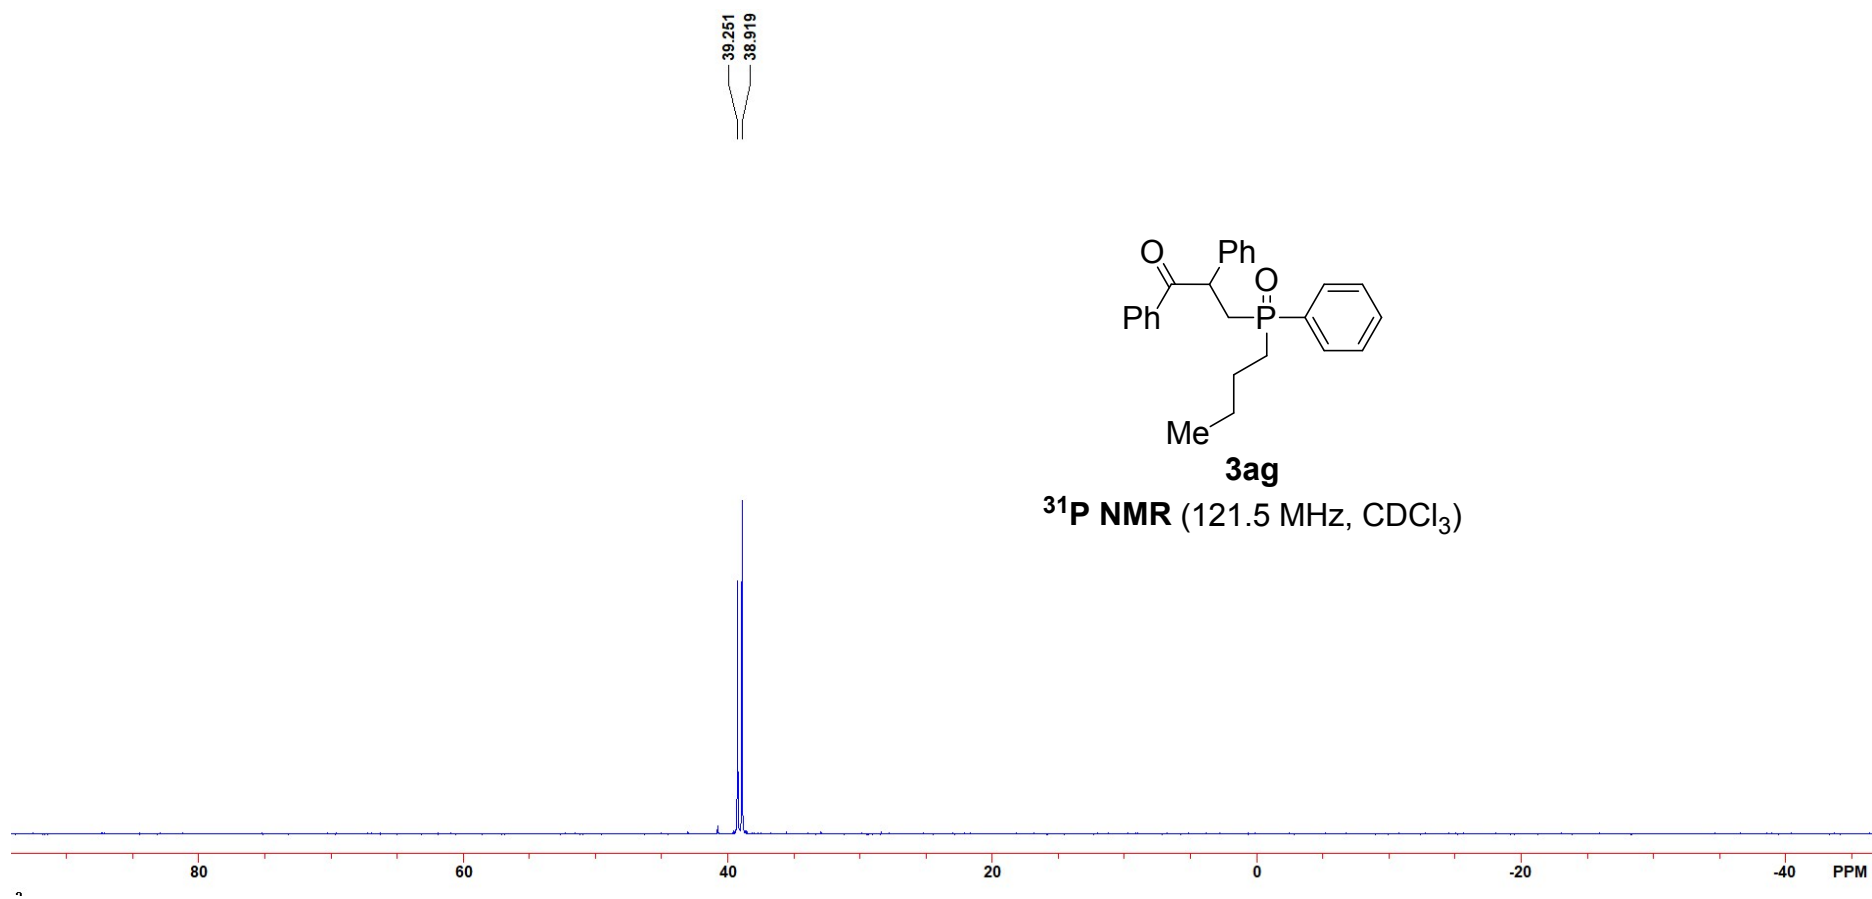

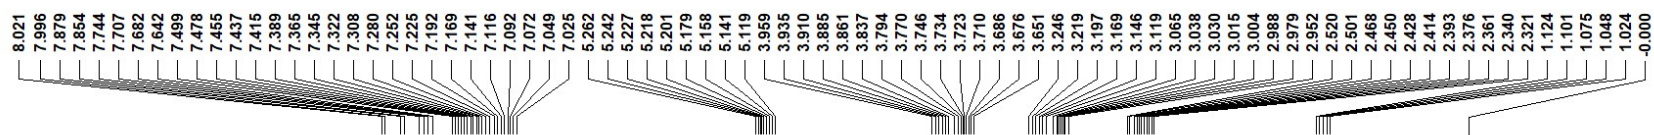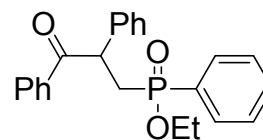

**3ah**

<sup>1</sup>H NMR (300 MHz, CDCl<sub>3</sub>)

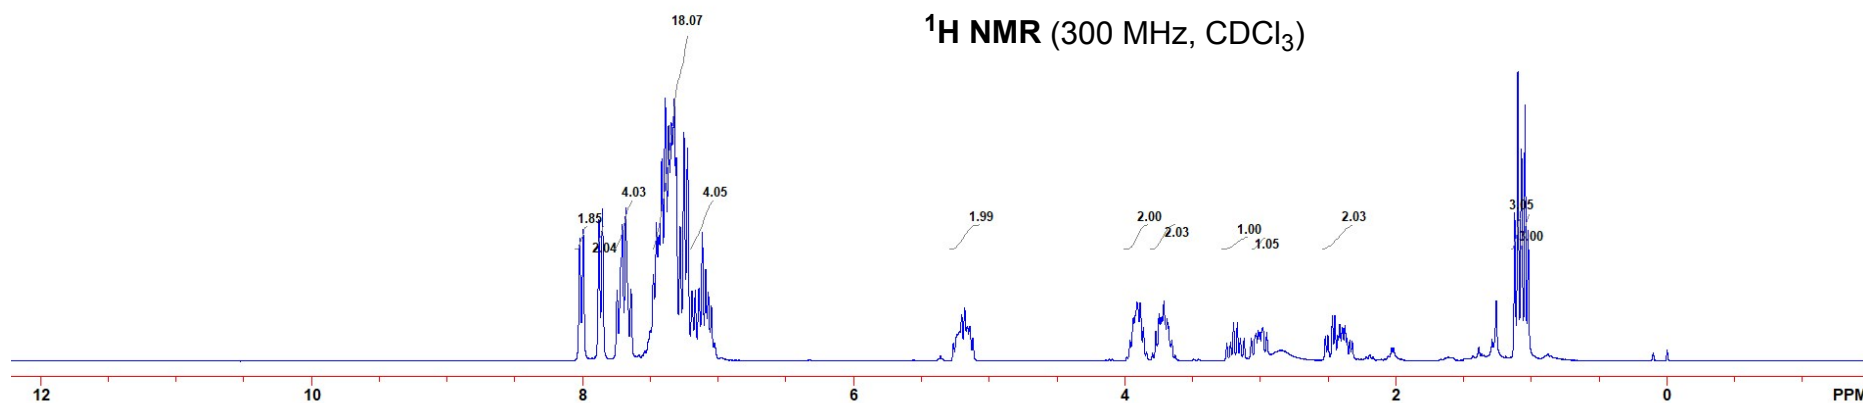

197.883  
197.795  
197.648  
197.560

138.947  
138.815  
138.251  
138.119  
136.899  
135.716  
132.946  
132.858  
132.170  
132.133  
131.994  
131.957  
131.635  
131.510  
131.378  
129.972  
129.715  
128.895  
128.770  
128.748  
128.675  
128.477  
128.397  
128.309  
128.272  
128.221  
128.140  
128.067  
127.254  
127.224  
77.425  
77.000  
76.575  
60.471  
60.427  
60.383  
60.346  
46.939  
46.924  
46.484  
46.462  
34.615  
34.454  
33.296  
33.135  
16.130  
16.042  
15.954

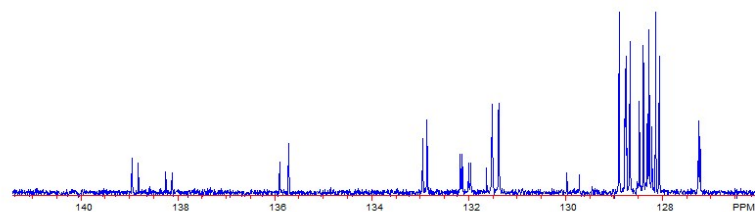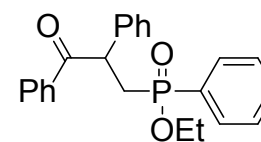

**3ah**

**<sup>13</sup>C NMR (75 MHz, CDCl<sub>3</sub>)**

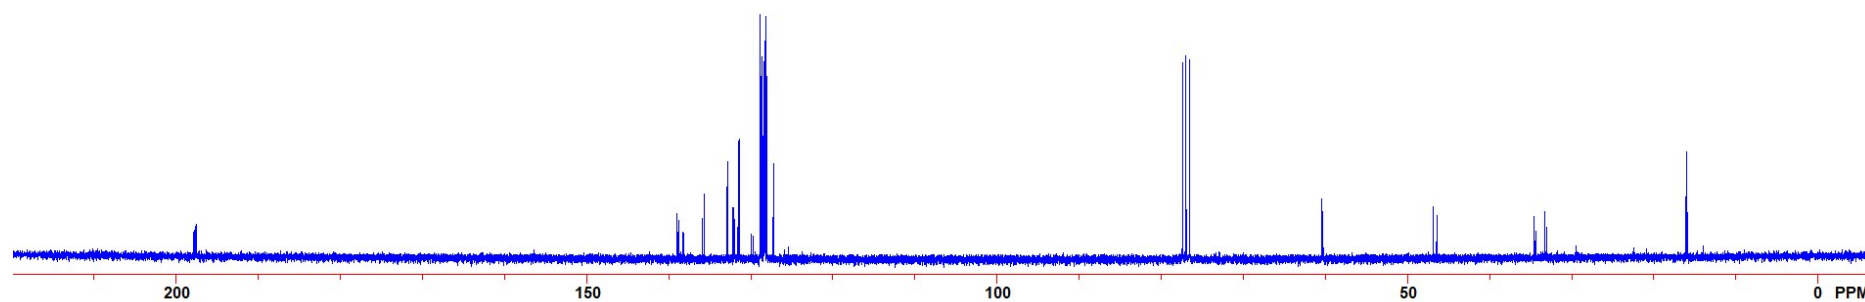

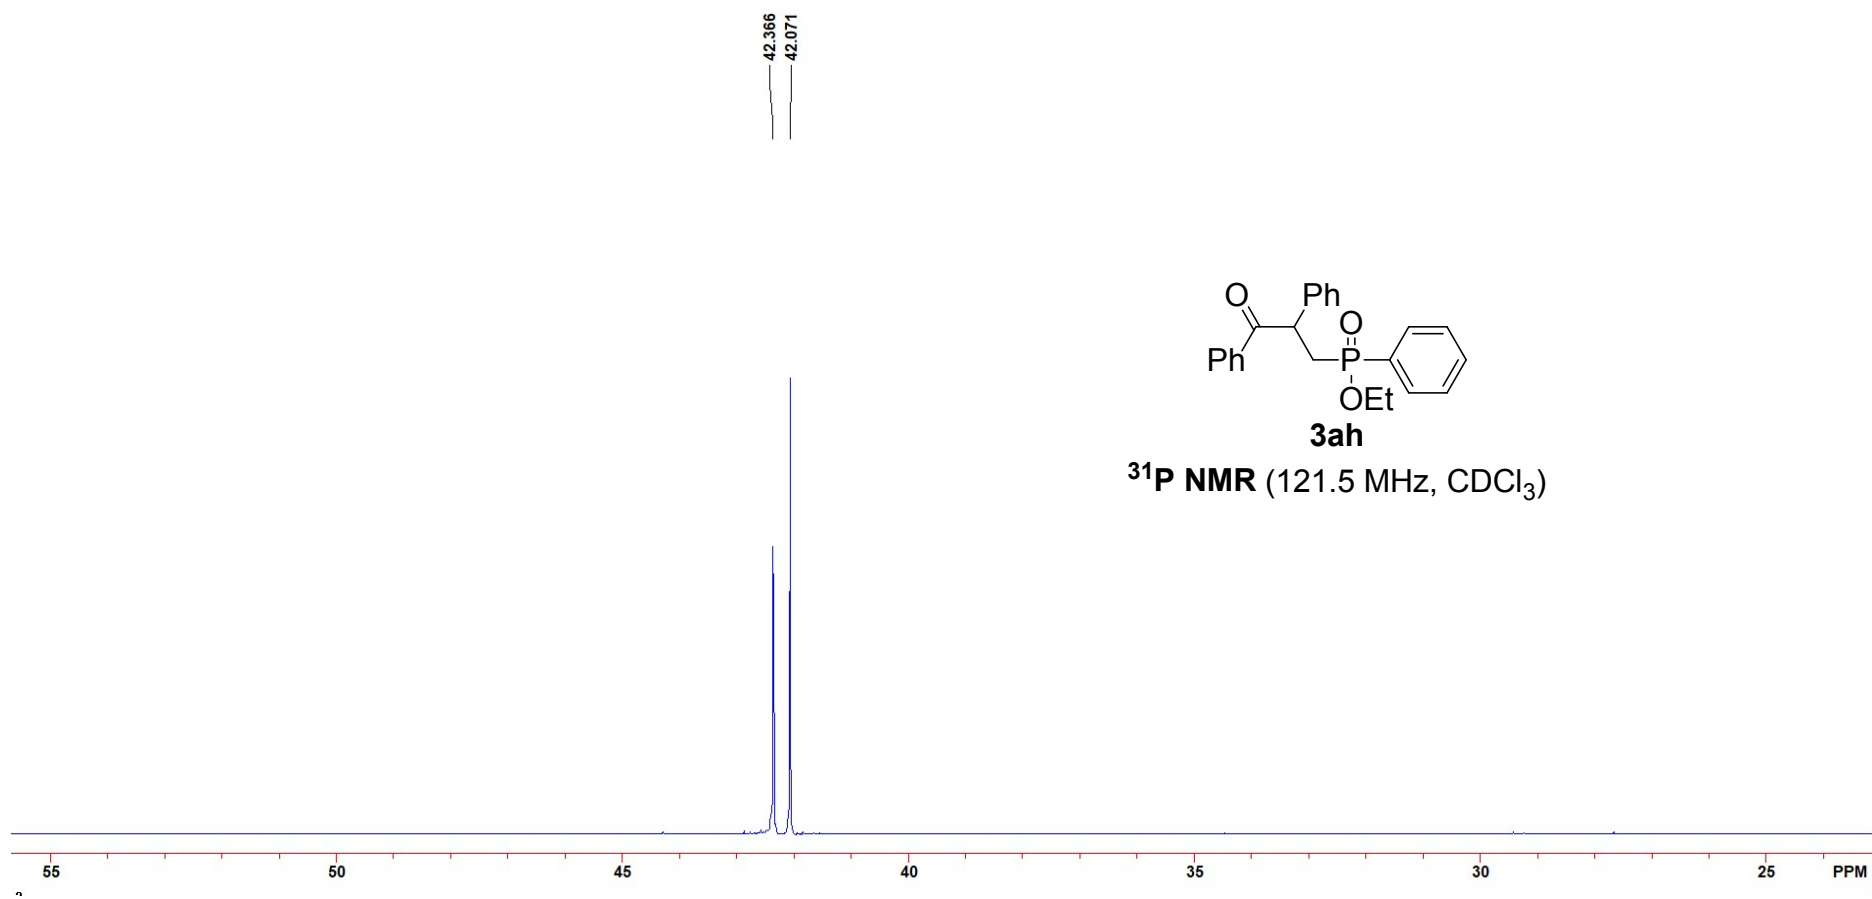

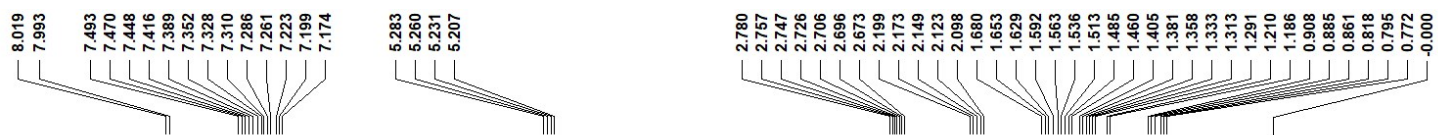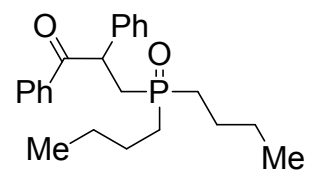

**3ai**

$^1\text{H}$  NMR (300 MHz,  $\text{CDCl}_3$ )

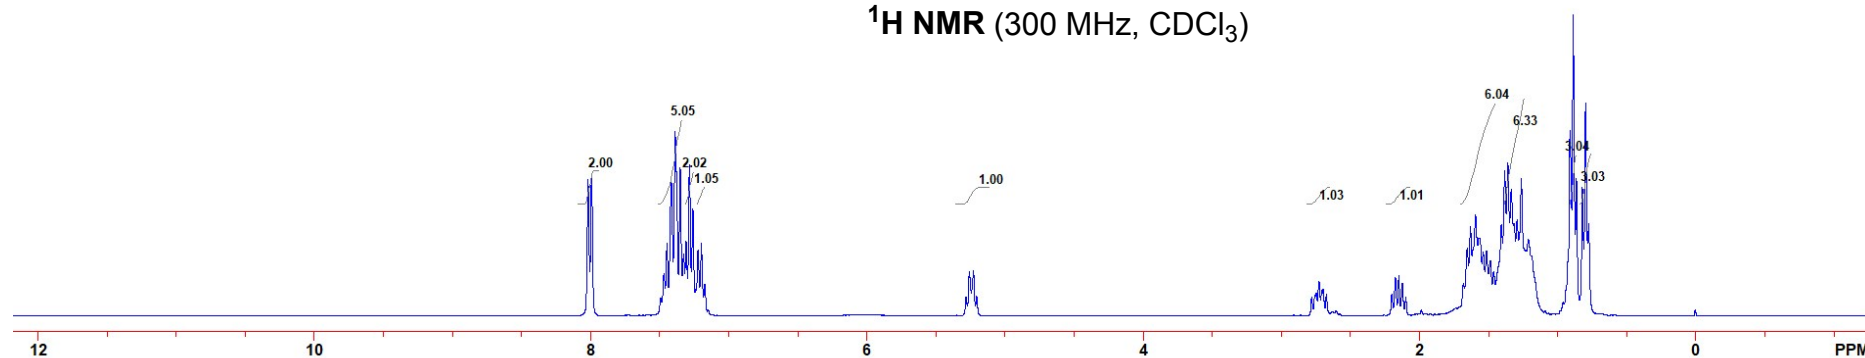

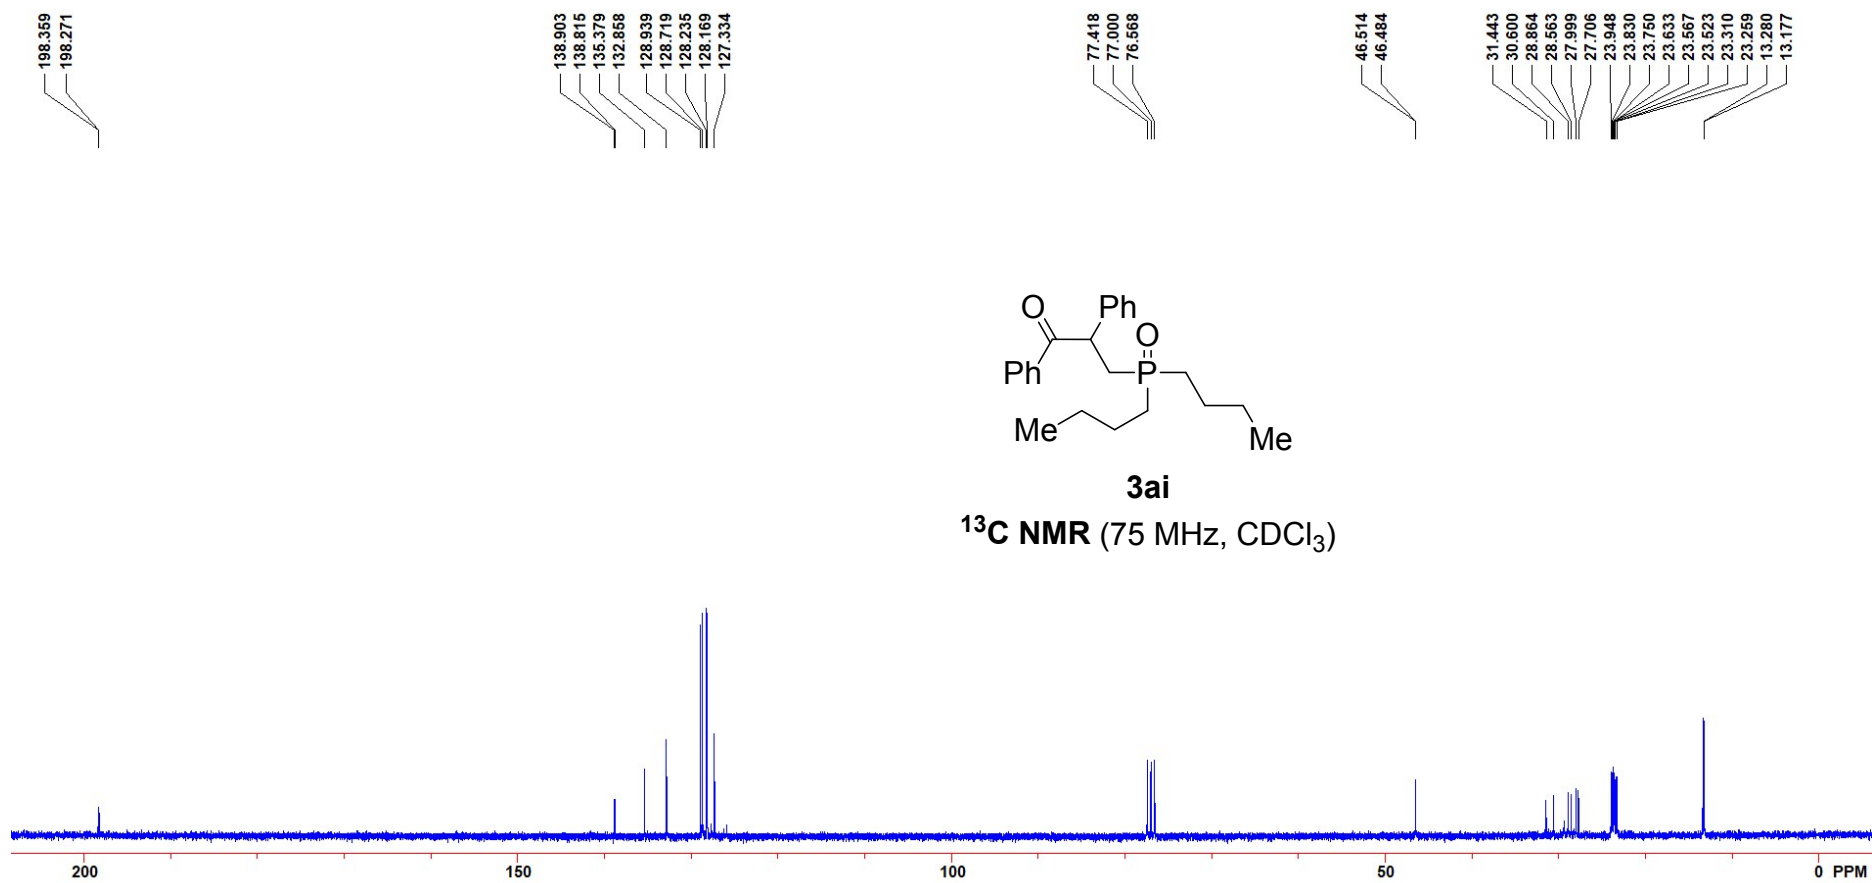



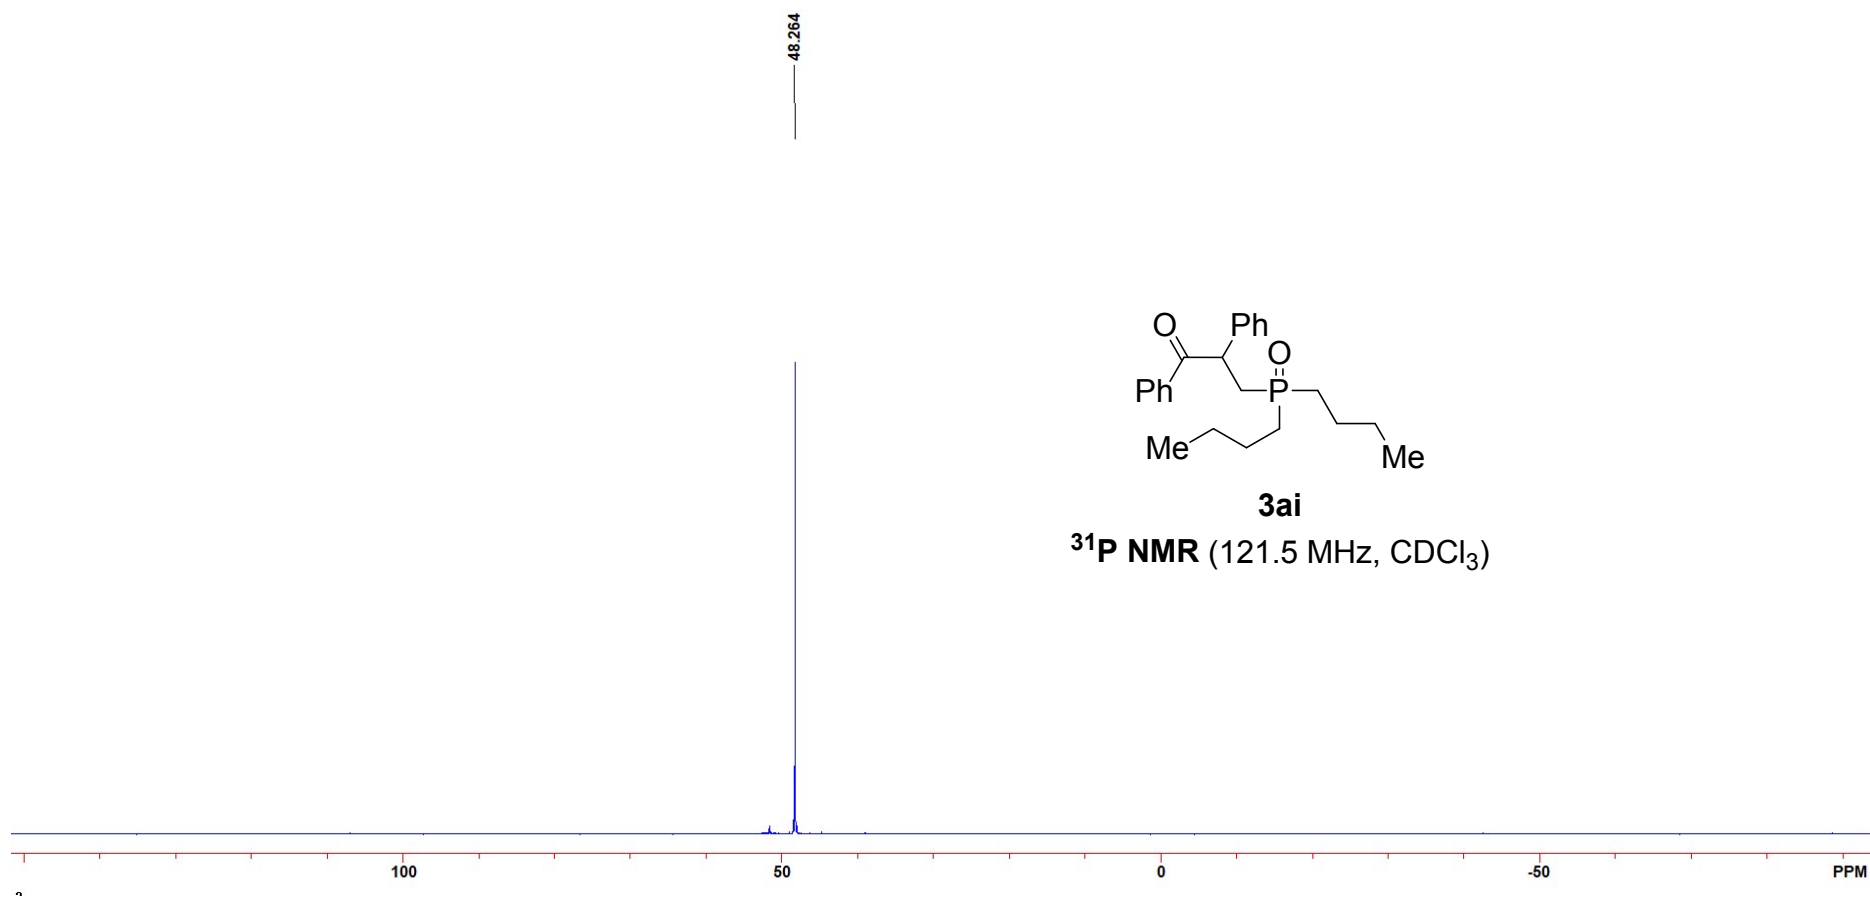

Supplement: c8ob00231b1.pdf [file c8ob00231b1.pdf]
